# Supplementary material for: A highly efficient, rapid one-pot synthesis of some new heteroaryl pyrano[2,3-c]pyrazoles in ionic liquid under microwave-irradiation
Source: Royal Society of Chemistry journal article supplement (doi:10.1039/c3ra00068k), 2013-01-01

## Supporting Information

### A highly efficient, rapid one-pot synthesis of some new heteroarylpyrano[2,3-*c*]pyrazoles in ionic liquid under microwave-irradiation

Narsidas J. Parmar <sup>a\*</sup>, Hitesh A. Barad<sup>a</sup>, Bhavesh R. Pansuriya<sup>a</sup>, Navin P. Talpada<sup>a</sup>

*Department of Chemistry, Sardar Patel University, Vallabh Vidyanagar-388120. Dist. Anand, Gujarat, India*

| Serial No. | Description                                                                                                                                                    | Page No. |
|------------|----------------------------------------------------------------------------------------------------------------------------------------------------------------|----------|
| 1.1        | General Methods                                                                                                                                                | 1-2      |
| 1.2        | General Procedure for Synthesis of Aldehydes ( <b>1</b> , <b>6</b> )                                                                                           | 2-3      |
| 1.3        | General Procedure for Synthesis of fused pyrano[2,3- <i>c</i> ]pyrazoles ( <b>3a-c</b> , <b>4a-c</b> , <b>5a-c</b> , <b>7a-c</b> , <b>8a-c</b> , <b>9a-c</b> ) | 3        |
| 1.4        | Analytical data for compounds                                                                                                                                  | 3-6      |
| 1.5        | Characteristic noe's of <b>7a</b>                                                                                                                              | 7        |
| 1.6        | Signal of H-4 and H-6/H-7a in <sup>1</sup> H NMR                                                                                                               | 7        |
| 1.7        | <sup>1</sup> H NMR, <sup>13</sup> C NMR, IR and Mass Spectral Data                                                                                             | 8-49     |

#### 1.1 General methods

All solvents and reagents were used as supplied from commercial sources. The recorded melting points are uncorrected. IR spectra were recorded in KBr on Shimadzu FT-IR 8401 spectrometer and are reported in wave numbers (cm<sup>-1</sup>). All microwave heating experiments were performed in a closed system, on Catalyst Scientific Microwave Oven model CATA-R (2.45 GHz, 140 to 700 Watts) from Catalyst™ Systems, Pune, India. <sup>1</sup>H NMR and <sup>13</sup>C NMR spectra were recorded on a Bruker Avance 400 spectrometer operating at 400 MHz for <sup>1</sup>H NMR and 100 MHz for <sup>13</sup>C NMR in CDCl<sub>3</sub> as both solvent and reference. Chemical shifts are expressed in parts per million (ppm, δ) and referenced to the residual protic solvent. Coupling constants are reported in Hertz (Hz). Splitting patterns are designated as s, for singlet; d, for doublet; t, for triplet; q, for quartet; br, for broad; m, for multiplet; comp, for complex multiplet. Degree of substitution (C, CH, CH<sub>2</sub>, and CH<sub>3</sub>) was determined by the DEPT-135 method. The ESI mass spectra were taken on Shimadzu LCMS-2010 spectrometer. Elemental analyses (% C, H, N) were carried out by Perkin-Elmer 2400 series-II elemental analyzer (Perkin-Elmer, USA). TLC was performed on Merck 60 F254 precoated silica plates, spots were detected under UV lamp

\* Corresponding author. Tel.: +91-2692-226858; fax: +91-2692-236475; e-mail: [njpchemdeptspu@yahoo.co.in](mailto:njpchemdeptspu@yahoo.co.in)

(254 nm, 366 nm), or by dipping into a permanganate solution ( prepared by dissolving 3 g  $\text{KMnO}_4$ , 20 g  $\text{K}_2\text{CO}_3$  , and 5 mL 5%  $\text{NaOH}$  in 300 mL  $\text{H}_2\text{O}$ ), or an anisaldehyde solution (prepared by dissolving 3% *p*-methoxybenzaldehyde and 1%  $\text{H}_2\text{SO}_4$  in  $\text{MeOH}$  ) or 2,4-dinitro phenyl hydrazine solution (prepared by dissolving 12 g 2,4-DNP and 6 mL Conc.  $\text{H}_2\text{SO}_4$  in a mixture of 8 mL water and 20 mL  $\text{EtOH}$  ) followed by heating.

## 1.2 General Procedure for Synthesis of Aldehydes (1, 6)

### 1.2.1 Synthesis of Quinoline-3-carboxaldehyde (1):

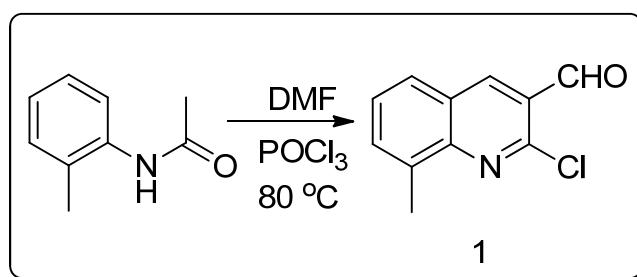

$\text{POCl}_3$  (98.28 mmol) was added drop wise to  $\text{DMF}$  (34.65 mmol) while maintaining the temperature at  $0\text{--}5\text{ }^\circ\text{C}$ . The mixture was allowed to stir for about 5 min. Acetanilide **1a** (10.37 mmol) was then added and the resulting solution heated for 8 h at  $75\text{--}80\text{ }^\circ\text{C}$ . The reaction mixture was cooled to room temperature and then poured into crushed ice with stirring. A pale yellow precipitate appeared immediately and was filtered and washed with water and then dried. The crude compound was recrystallized from ethyl acetate.

### 1.2.2 3-chloro-1H-indole-2-carbaldehyde (6):

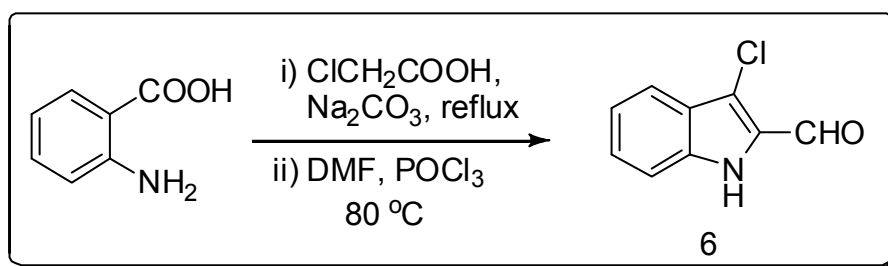

#### a) Phenylglycine-*o*-carboxylic acid:

In a 750 ml round bottomed flask fitted with a reflux condenser place 14 gm of anthranilic acid, 10 gm of chloroacetic acid, 20 gm of anhydrous sodium carbonate and 200 ml of water. Reflux the mixture for 3 h, then pour into a beaker, cool, render slightly acidic with concentrated hydrochloric acid, and allow to stand overnight. Filter off the crude acid and wash it with water. Recrystallize from hot water and dry at  $100\text{ }^\circ\text{C}$ .

b) **3-chloro-1H-indole-2-carbaldehyde:**

The Vilsmeier reagent was prepared by the drop wise addition of POCl<sub>3</sub> (30 mmol) to cooled DMF (5 mL) under constant stirring. The Phenylglycine-*o*-carboxylic acid (5 mmol) was dissolved in 5 mL of DMF and added drop wise to the Vilsmeier reagent. The reaction mixture was gradually allowed to attain rt, stirred for further 30 min, refluxed on a water bath maintained at 60-80 °C for 4-6 h. After the completion of the reaction, the reaction mixture was cooled and neutralized with crushed ice. Filter off the crude product and recrystallize from ethyl acetate.

**1.3 General Procedure for Synthesis of fused pyrano[2,3-*c*]pyrazoles (3a-c, 4a-c, 5a-c, 7a-c, 8a-c, 9a-c)**

Equimolar amounts (5 mmol) of pyrazole **2a-c** and the appropriate heteroaryl aldehyde **1** or **6** with an excess of dienophile (7 mmol) taken in 2 mL ionic liquid TEAA was subjected to microwave irradiation at 420 W to complete the reaction as monitored by TLC. When poured the reaction mass, after cooling to room temperature, into ice, it gave quantitative desired products **3-5**, and **7-9**, as purified by column chromatography using a mixture containing ethyl acetate and n-hexane in a ratio of 30:70 as an eluent. Mixture of ionic liquid and water left after product isolation was then heated to evaporate water to recover the TEAA. All the newly synthesized compounds were characterized based on their elemental, mass, NMR and IR spectroscopy.

**1.4 Analytical data for compounds**

**4-(2-chloro-8-methylquinolin-3-yl)-6-ethoxy-3-methyl-1-phenyl-1,4,5,6-tetrahydro-pyrano[2,3-*c*]pyrazole (3a):**

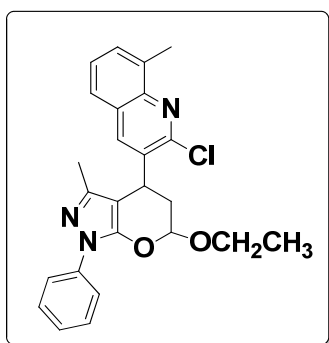

Isolated Yield (1.9 g, 90 %) as colorless crystals, mp 112-114 °C;  $\nu_{\max}/\text{cm}^{-1}$  = 2973, 2920, 1607, 1523, 1384, 1167, 1066, 769;  $\delta_{\text{H}}$  (400 MHz, CDCl<sub>3</sub>) 0.93 (t, 3H,  $J$  = 6.8 Hz &  $J$  = 6.4 Hz, OCH<sub>2</sub>CH<sub>3</sub>), 1.96 (s, 3H, C(3)CH<sub>3</sub>), 2.39-2.53 (m, 2H, C(5)H), 2.81 (s, 3H, C(Quinoline)CH<sub>3</sub>), 3.47-3.87 (m, 2H, OCH<sub>2</sub>CH<sub>3</sub>), 4.58 (d, 1H,  $J$  = 3.6 Hz, C(4)H), 5.51 (m, 1H, C(6)H), 7.39-7.93 (m, 9H, C(Ar)H) ppm;  $\delta_{\text{C}}$  (100 MHz; CDCl<sub>3</sub>) 13.15, 14.85, 17.82, 30.43, 33.25, 64.77, 96.87, 101.91, 119.99, 125.30, 125.52, 126.71, 127.44, 129.08,

129.98, 134.08, 136.21, 138.82, 138.97, 145.93, 146.94, 149.27, 149.63 ppm; Anal. Calcd for C<sub>25</sub>H<sub>24</sub>ClN<sub>3</sub>O<sub>2</sub>: C, 69.20; H, 5.57; N, 9.68. Found: C, 69.25; H, 5.55; N, 9.70.

**4-(2-chloro-8-methylquinolin-3-yl)-6-ethoxy-3,5-dimethyl-1-phenyl-1,4,5,6-tetrahydro pyrano[2,3-c]pyrazole (4a):**

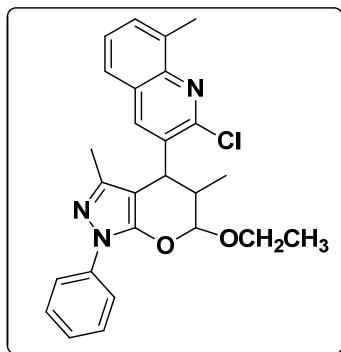

Isolated Yield (1.96 g, 90 %) as colorless crystals, mp 174-176 °C;  $\nu_{\max}/\text{cm}^{-1}$  = 2958, 2915, 2833, 1653, 1601, 1522, 1367, 982, 745;  $\delta_{\text{H}}$  (400 MHz,  $\text{CDCl}_3$ ) 1.15 (d, 3H,  $J$  = 6.4 Hz, C(5) $\text{CH}_3$ ), 1.25 (t, 3H,  $J$  = 6.4 Hz &  $J$  = 6.8 Hz,  $\text{OCH}_2\text{CH}_3$ ), 1.78 (s, 3H, C(3) $\text{CH}_3$ ), 2.30 (m, 1H, C(5)H), 2.83 (s, 3H, C(Quinoline) $\text{CH}_3$ ), 3.65-4.04 (m, 2H,  $\text{OCH}_2\text{CH}_3$ ), 4.45 (d, 1H,  $J$  = 4.2 Hz, C(4)H), 5.22 (d, 1H,  $J$  = 4.2 Hz, C(6)H), 7.24-7.94 (m, 9H, C(Ar)H) ppm;  $\delta_{\text{C}}$  (100 MHz;  $\text{CDCl}_3$ ) 13.09, 13.32, 14.95, 17.79, 65.65, 98.07, 103.97, 119.94, 125.23, 125.42, 126.98, 127.53, 129.04, 130.35, 136.51, 138.80, 146.03, 146.66, 148.87 ppm;  $m/z$ (ESI) 447.8 ( $\text{M}^+$ ); Anal. Calcd for  $\text{C}_{26}\text{H}_{26}\text{ClN}_3\text{O}_2$ : C, 69.71; H, 5.85; N, 9.38. Found: C, 69.65; H, 5.80; N, 9.32.

**4-(2-chloro-8-methylquinolin-3-yl)-3-methyl-1-phenyl-1,4,4a,5,6,7a-hexahydro furo[3',2':5,6]pyrano[2,3-c]pyrazole (5a):**

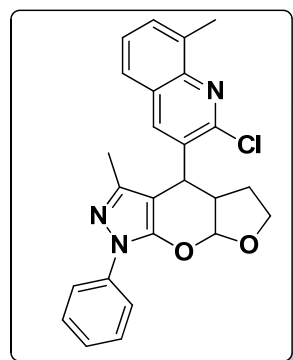

Isolated Yield (1.8 g, 88 %) as colorless crystals, mp 164-166 °C;  $\nu_{\max}/\text{cm}^{-1}$  = 3038, 2974, 2903, 1610, 1519, 1384, 1072, 753;  $\delta_{\text{H}}$  (400 MHz,  $\text{CDCl}_3$ ) 2.05 (s, 3H, C(3) $\text{CH}_3$ ), 2.08 (m, 1H, C(4a)H), 2.44-2.72 (m, 2H, C(5)H), 2.81 (s, 3H, C(Quinoline) $\text{CH}_3$ ), 4.12-4.36 (m, 2H, C(6)H), 4.60 (d, 1H,  $J$  = 3.8 Hz, C(4)H), 5.58 (d, 1H,  $J$  = 3.2 Hz, C(7a)H), 7.25-7.94 (m, 9H, C(Ar)H) ppm;  $\delta_{\text{C}}$  (100 MHz;  $\text{CDCl}_3$ ) 12.85, 17.82, 27.48, 33.49, 45.83, 68.74, 102.11, 120.03, 125.45, 125.58, 127.19, 127.44, 129.10, 130.50, 135.04, 136.42, 137.08, 138.69, 146.05, 147.09, 149.30, 149.44 ppm;  $m/z$ (ESI) 431.3 ( $\text{M}^+$ ); Anal. Calcd for  $\text{C}_{25}\text{H}_{22}\text{ClN}_3\text{O}_2$ : C, 69.52; H, 5.13; N, 9.73. Found: C, 69.48; H, 5.15; N, 9.70.

**4-(2-chloro-8-methylquinolin-3-yl)-1,3-diphenyl-1,4,4a,5,6,7a-hexahydro-furo[3',2':5,6]pyrano[2,3-c]pyrazole (5c):**

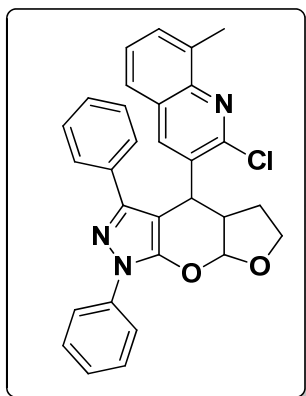

Isolated Yield (2.0 g, 86 %) as colorless crystals, mp 204-206 °C;  $\nu_{\max}/\text{cm}^{-1}$  = 2970, 2912, 1601, 1509, 1383, 1104, 754;  $\delta_{\text{H}}$  (400 MHz,  $\text{CDCl}_3$ ) 2.04-2.47 (m, 2H, C(5)H), 2.78 (m, 1H, C(4a)H), 2.83 (s, 3H, C(Quinoline) $\text{CH}_3$ ), 4.13-4.36 (m, 2H, C(6)H), 4.99 (d, 1H,  $J$  = 4.2 Hz, C(4)H), 5.67 (d, 1H,  $J$  = 3.6 Hz, C(7a)H), 7.22-8.09 (m, 14H, C(Ar)H) ppm;  $\delta_{\text{C}}$  (100 MHz;  $\text{CDCl}_3$ ) 17.78, 27.34, 34.83, 45.53, 68.86, 91.95, 102.25, 120.54, 125.57, 126.05, 126.16, 127.19, 127.45, 128.06, 128.65, 129.14, 130.60, 132.97, 135.20, 136.39, 137.54, 138.74, 146.17, 147.93, 148.97, 150.17 ppm; Anal. Calcd for  $\text{C}_{30}\text{H}_{24}\text{ClN}_3\text{O}_2$ : C, 72.94; H, 4.90; N, 8.51. Found: C, 72.85; H, 5.10; N, 8.46.

**4-(3-chloro-1*H*-indol-2-yl)-6-ethoxy-3-methyl-1-phenyl-1,4,5,6-tetrahydropyrano[2,3-*c*]pyrazole (7a):**

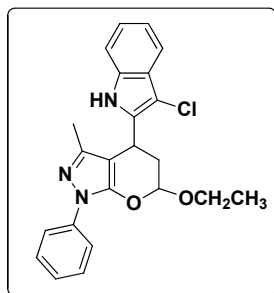

Isolated Yield ( 1.86 g, 90 %) as colorless crystals, mp= 186-188 °C(d);  $\nu_{\max}/\text{cm}^{-1}$  = 2923, 2854, 1622, 1545, 1480, 1370, 1152, 1031, 978, 737;  $\delta_{\text{H}}$  (400 MHz,  $\text{CDCl}_3$ ) 1.15 (t, 3H,  $J$  = 7.2 Hz & 6.8 Hz,  $\text{OCH}_2\text{CH}_3$ ), 1.36 (m, 1H, 5a-H), 1.79 (s, 3H, 3- $\text{CH}_3$ ), 2.09 (m, 1H, 5b-H), 3.53-3.77 (m, 2H,  $\text{OCH}_2\text{CH}_3$ ), 4.49 (d-d, 1H,  $J$  = 6 Hz & 10.4 Hz, 4-H), 5.17 (m, 1H, 6-H), 7.18-7.73 (m, 9H, Ar-H), 9.97 (s, 1H, NH) ppm. Anal. Calcd for  $\text{C}_{23}\text{H}_{22}\text{ClN}_3\text{O}_2$ : C, 67.73; H, 5.44; N, 10.30. Found: C, 67.90; H, 5.39; N, 10.34.

**4-(3-chloro-1*H*-indol-2-yl)-6-ethoxy-3-methyl-1-(*p*-tolyl)-1,4,5,6-tetrahydropyrano[2,3-*c*]pyrazole (7b):**

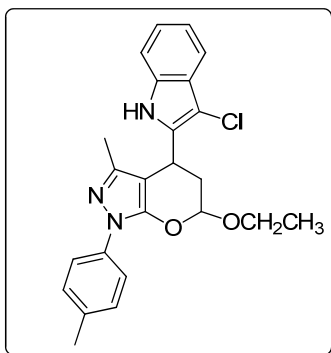

Isolated Yield (2.0 g, 85 %) as colourless crystals, mp 170-172 °C (d);  $\nu_{\max}/\text{cm}^{-1}$  = 2923, 2854, 1622, 1545, 1480, 1370, 1152, 1031, 978, 737;  $\delta_{\text{H}}$  (400 MHz,  $\text{CDCl}_3$ ) 1.16 (t, 3H,  $J$  = 7.2 Hz &  $J$  = 7.2 Hz,  $\text{OCH}_2\text{CH}_3$ ), 1.30 (1H, C(5a)H), 1.80 (s, 3H, C(3) $\text{CH}_3$ ), 2.13 (m, 1H, C(5b)H), 2.38 (s, 3H, C(Ph) $\text{CH}_3$ ), 3.51-3.80 (m, 2H,  $\text{OCH}_2\text{CH}_3$ ), 4.50 (d-d, 1H,  $J$  = 5.6 & 10 Hz, C(4)H), 5.17 (m, 1H, C(6)H), 7.18-7.73 (m, 8H, C(Ar)H), 9.97 (s, 1H, NH) ppm;  $\delta_{\text{C}}$  (100 MHz;  $\text{CDCl}_3$ ) 12.80, 14.95, 20.90, 22.65, 24.26, 33.58, 65.03, 96.22, 100.81, 111.34, 117.62, 119.92, 120.11, 120.27, 122.42, 126.02, 129.54, 134.56, 135.17, 136.07, 146.85, 148.55 ppm; Anal. Calcd for  $\text{C}_{24}\text{H}_{24}\text{ClN}_3\text{O}_2$ : C, 68.32; H, 5.73; N, 9.96. Found: C, 68.28; H, 5.72; N, 10.01.

**4-(3-chloro-1*H*-indol-2-yl)-6-ethoxy-1,3-diphenyl-1,4,5,6-tetrahydropyrano[2,3-*c*]pyrazole (7c):**

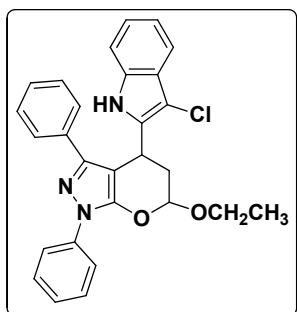

Isolated Yield (2.1 g, 82 %) as colourless crystals, mp 176-178 °C(d);  $\nu_{\max}/\text{cm}^{-1}$  = 2977, 2927, 1592, 1573, 1511, 1454, 1384, 1110, 1041, 979, 752;  $\delta_{\text{H}}$  (400 MHz,  $\text{CDCl}_3$ ) 1.27 (t, 3H,  $J$  = 7.2 Hz &  $J$  = 6.8 Hz,  $\text{OCH}_2\text{CH}_3$ ), 2.14-2.47 (m, 2H, C(5)H), 3.67-4.04 (m, 2H,  $\text{OCH}_2\text{CH}_3$ ), 4.87 (t, 1H,  $J$  = 6.4 Hz &  $J$  = 6.8 Hz, C(4)H), 5.41 (m, 1H, 6-H), 7.08-7.99 (m, 14H, C(Ar)H), 8.08 (s, 1H, NH) ppm;  $^{13}\text{C}$   $\delta_{\text{C}}$  (100 MHz;  $\text{CDCl}_3$ ) 15.06, 26.44, 34.31, 65.54, 94.42, 101.26, 103.42, 111.20, 117.55, 120.32, 120.65, 122.44, 126.13, 126.24, 126.46, 127.92, 128.17, 129.10, 132.36, 133.90, 134.71, 138.57, 148.38, 150.06 ppm;  $m/z$ (ESI) 469.8 ( $\text{M}^+$ ); Anal. Calcd for  $\text{C}_{28}\text{H}_{24}\text{ClN}_3\text{O}_2$ : C, 71.56; H, 5.15; N, 8.94. Found: C, 71.44; H, 5.08; N, 9.01.

**4-(3-chloro-1*H*-indol-2-yl)-6-ethoxy-3,5-dimethyl-1-phenyl-1,4,5,6-tetrahydropyrano  
[2,3-*c*]pyrazole (8a):**

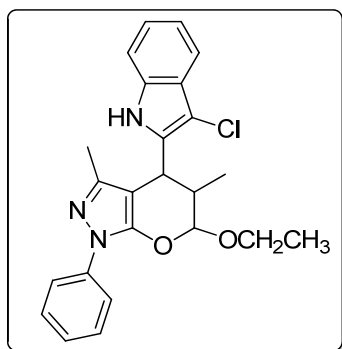

Isolated Yield (2.0 g 87 %) as colourless crystals, mp 190-192 °C(d);  $\nu_{\max}/\text{cm}^{-1}$  =3010, 2976, 1609, 1514, 1383, 1072, 747;  $\delta_{\text{H}}$  (400 MHz,  $\text{CDCl}_3$ ) 0.86 (d, 3H,  $J = 7.2$  Hz, C(5)CH<sub>3</sub>), 1.16 (t, 3H,  $J = 6.8$  Hz, OCH<sub>2</sub>CH<sub>3</sub>), 1.35-1.50 (m, 1H, C(5)H), 1.63 (s, 3H, C(3)CH<sub>3</sub>), 3.55-4.14 (m, 2H, OCH<sub>2</sub>CH<sub>3</sub>), 4.108 (d, 1H,  $J = 7.0$  Hz, C(4)H), 4.91 (d, 1H,  $J = 2$  Hz, C(6)H), 7.18-7.92 (m, 9H, C(Ar)H), 10.27 (s, 1H, NH) ppm;  $^{13}\text{C}$   $\delta_{\text{C}}$  (100 MHz;  $\text{CDCl}_3$ ) 12.51, 13.29, 30.54, 30.63, 38.17, 65.27, 97.66, 104.42, 104.47, 105.12, 111.44, 117.86, 119.70,

119.90, 122.36, 125.24, 125.73, 128.99, 133.49, 134.89, 138.50, 147.33, 148.52 ppm; Anal. Calcd for C<sub>24</sub>H<sub>24</sub>ClN<sub>3</sub>O<sub>2</sub>: C, 68.32; H, 5.73; N, 9.96. Found: C, 68.28; H, 5.78; N, 9.92.

**4-(3-chloro-1*H*-indol-2-yl)-3-methyl-1-phenyl-1,4,4a,5,6,7a-hexahydrofuro  
[3',2':5,6]pyrano[2,3-*c*]pyrazole (9a):**

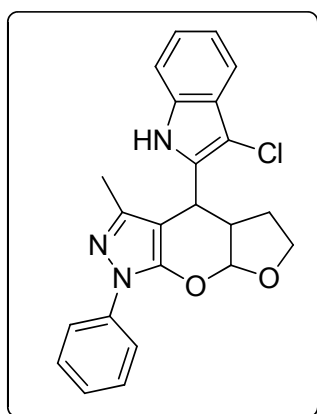

Isolated Yield (2.0 g, 89 %) as colourless crystals, mp 178-180 °C(d);  $\nu_{\max}/\text{cm}^{-1}$  =3010, 2976, 1609, 1514, 1383, 1072, 747;  $\delta_{\text{H}}$  (400 MHz,  $\text{CDCl}_3$ ) 1.90-1.96 (m, 1H, C(4a)H), 2.01 (s, 3H, C(3)CH<sub>3</sub>), 3.35-2.73 (m, 2H, C(5)H), 4.05-4.26 (m, 2H, C(6)H), 4.49 (d, 1H,  $J = 4.8$  Hz, C(4)H), 5.31 (d, 1H,  $J = 3.6$  Hz, C(7a)H), 7.21-7.86 (m, 9H, C(Ar)H), 9.29 (br, 1H, N-H) ppm;  $\delta_{\text{C}}$  (100 MHz;  $\text{CDCl}_3$ ) 12.65, 27.27, 28.05, 45.38, 68.52, 102.68, 111.58, 117.69, 118.61, 119.60, 119.67, 120.57, 122.69, 125.66, 126.53, 129.15, 133.96, 135.59, 138.46, 147.54, 149.33 ppm;  $m/z$ (ESI) 405.9 ( $\text{M}^+$ ); Anal. Calcd for C<sub>23</sub>H<sub>20</sub>ClN<sub>3</sub>O<sub>2</sub>: C, 68.06; H, 4.97; N, 10.35. Found: C, 68.10; H, 5.01; N, 10.32.

**4-(3-chloro-1*H*-indol-2-yl)-1,3-diphenyl-1,4,4a,5,6,7a-hexahydrofuro  
[3',2':5,6]pyrano[2,3-*c*]pyrazole (9c):**

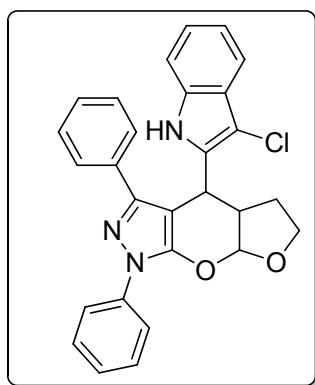

Isolated Yield (2.3 g, 90 %) as colourless crystals, mp 210-212 °C(d);  $\nu_{\max}/\text{cm}^{-1}$  =2999, 2945, 1619, 1583, 1541, 1444, 1353, 1121, 1001, 980, 756;  $\delta_{\text{H}}$  (400 MHz,  $\text{CDCl}_3$ ) 1.97-2.05 (m, 1H, C(4a)H), 2.34-2.96 (m, 2H, C(5)H), 4.12-4.33 (m, 2H, C(6)H), 4.85 (d, 1H,  $J = 0.8$  Hz, C(4)H), 5.79 (d, 1H,  $J = 3.6$  Hz, C(7a)H), 7.21-8.05 (m, 14H, C(Ar)H), 8.02 (br, 1H, N-H) ppm;  $\delta_{\text{C}}$  (100 MHz;  $\text{CDCl}_3$ ) 26.99, 29.51, 29.59, 45.20, 68.74, 79.08, 90.14, 102.45, 103.09, 111.61, 120.47, 120.62, 120.78, 122.93, 126.18, 126.62, 128.23, 128.77, 129.14, 132.66, 133.85, 135.58, 138.54, 148.35, 149.98 ppm; Anal. Calcd for

C<sub>28</sub>H<sub>22</sub>ClN<sub>3</sub>O<sub>2</sub>: C, 71.87; H, 4.74; N, 8.98. Found: C, 71.75; H, 4.82; N, 8.90.

## 1.5 Characteristicnoe's of 7a

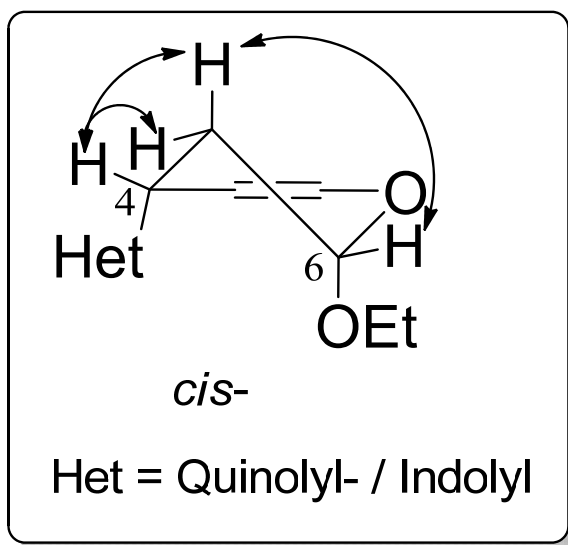

## 1.6 Signal of H-4 and H-6/H-7a in <sup>1</sup>H NMR

**Table 4:** Signals of H-4 and H-6/H-7a in the <sup>1</sup>H NMR spectra of *cis* **3-5** & **7-9**

| Cis    | $\delta$ (H-4) (ppm)           | $\delta$ (H-6) (ppm)           | Cis    | $\delta$ (H-4) (ppm) | $\delta$ (H-7a) (ppm) |
|--------|--------------------------------|--------------------------------|--------|----------------------|-----------------------|
|        | $J_{5(ax),4}/J_{5(eq),4}$ (Hz) | $J_{5(ax),6}/J_{5(eq),6}$ (Hz) |        | $J_{4a(eq),4}$ (Hz)  | $J_{4a(eq),7a}$ (Hz)  |
| Cis-3a | 4.58                           | 5.51                           | Cis-5a | 4.60                 | 5.58                  |
|        | 3.6/3.6                        | -                              |        | 3.8                  | 3.2                   |
| Cis-4a | 4.45                           | 5.22                           | Cis-5c | 4.99                 | 5.67                  |
|        | 4.2                            | 4.2                            |        | 4.2                  | 3.6                   |
| Cis-7a | 4.49                           | 5.17                           | Cis-9a | 4.49                 | 5.31                  |
|        | 10.4/6.0                       | -                              |        | 4.8                  | 3.6                   |
| Cis-7b | 4.50                           | 5.17                           | Cis-9c | 4.85                 | 5.79                  |
|        | 10.0/5.6                       | -                              |        | 0.8                  | 3.6                   |
| Cis-7c | 4.87                           | 5.41                           |        |                      |                       |
|        | 6.8/6.4                        | -                              |        |                      |                       |
| Cis-8a | 4.10                           | 4.91                           |        |                      |                       |
|        | 7.0                            | 2                              |        |                      |                       |

# 1.7 <sup>1</sup>H NMR, <sup>13</sup>C NMR and Mass Spectral Data

## <sup>1</sup>H-NMR/3a/CDCl<sub>3</sub>

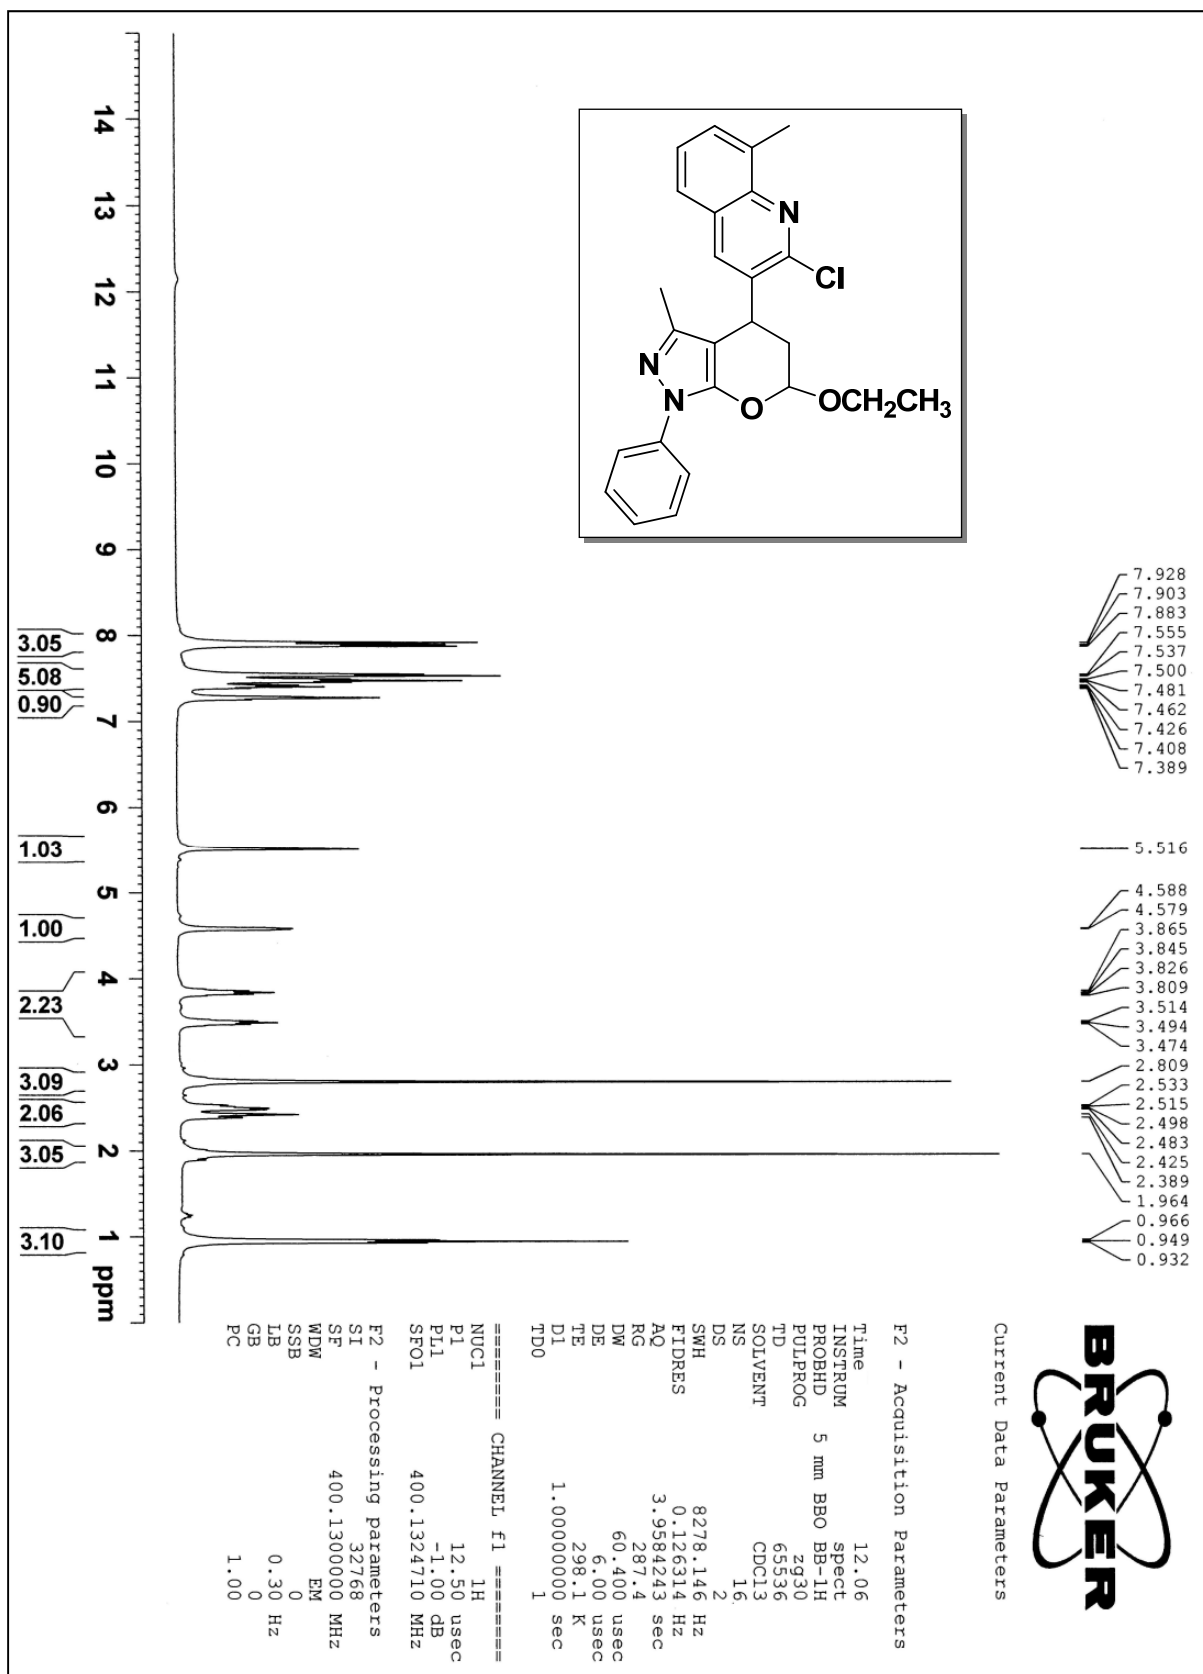



<sup>13</sup>C-NMR (DEPT-135)/**3a**/ CDCl<sub>3</sub>

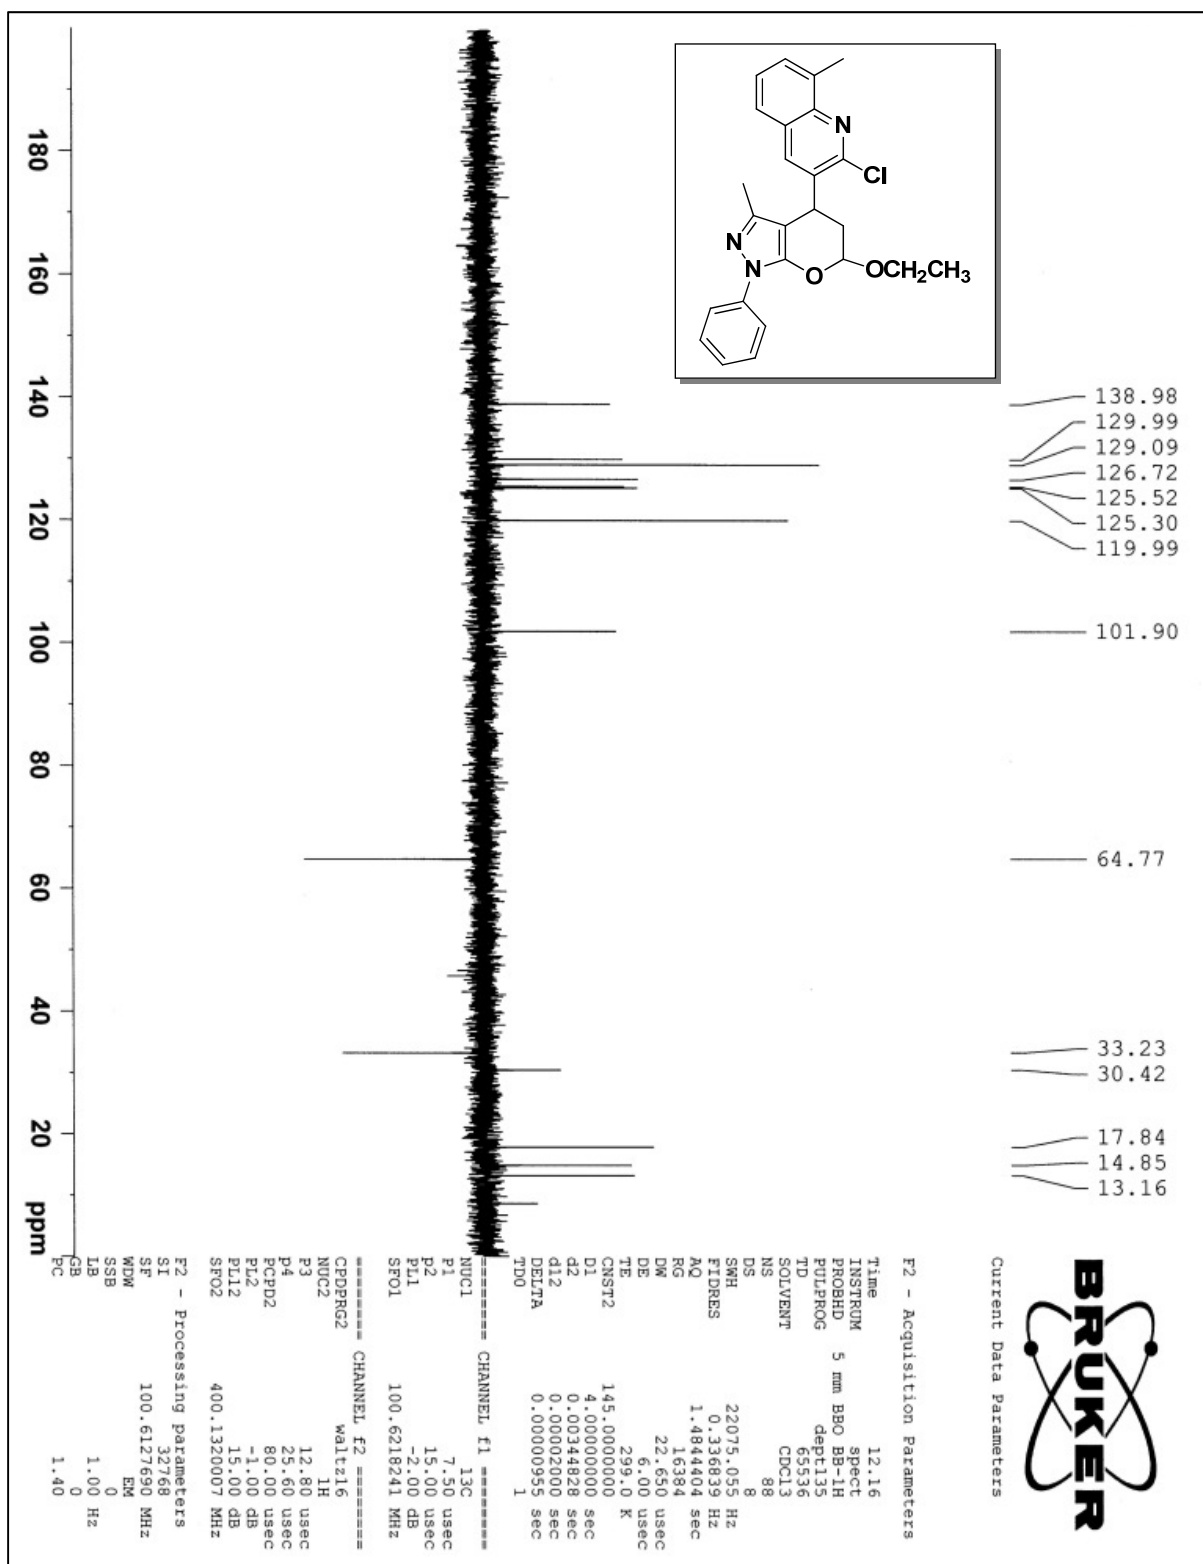

<sup>13</sup>C-NMR/3a/ CDCl<sub>3</sub>

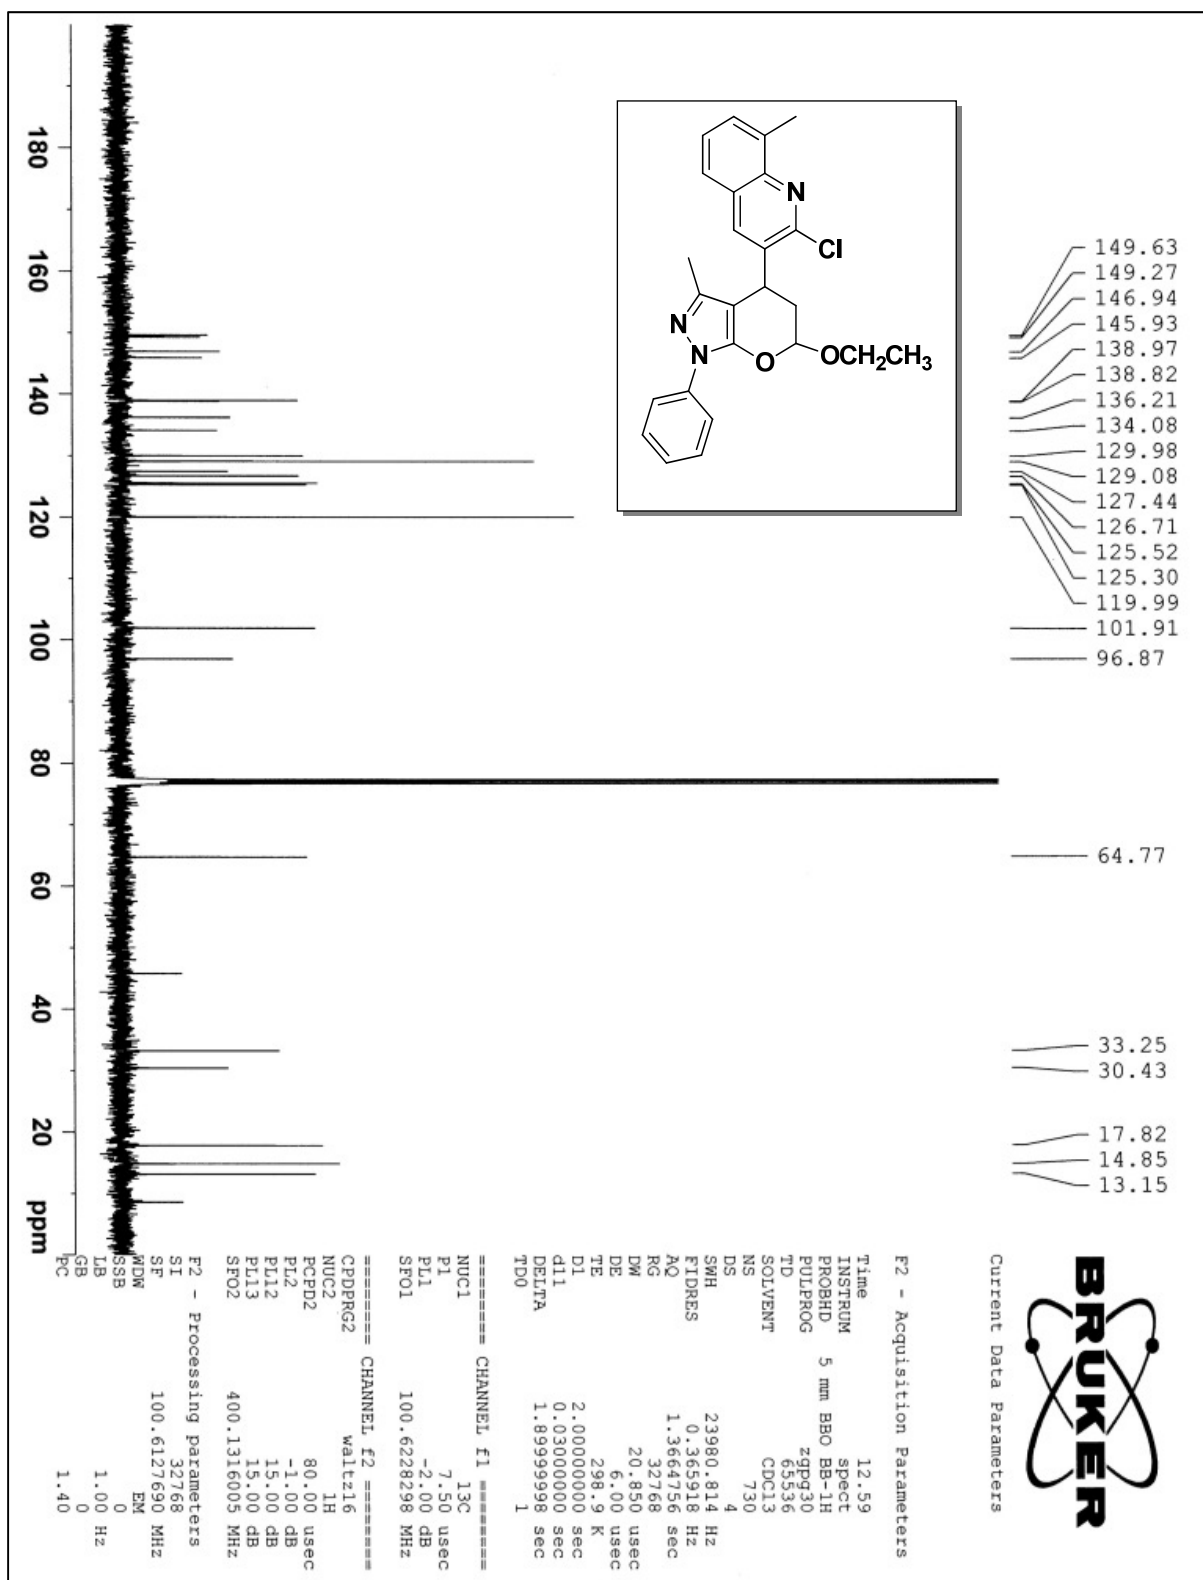

IR/3a/KBr

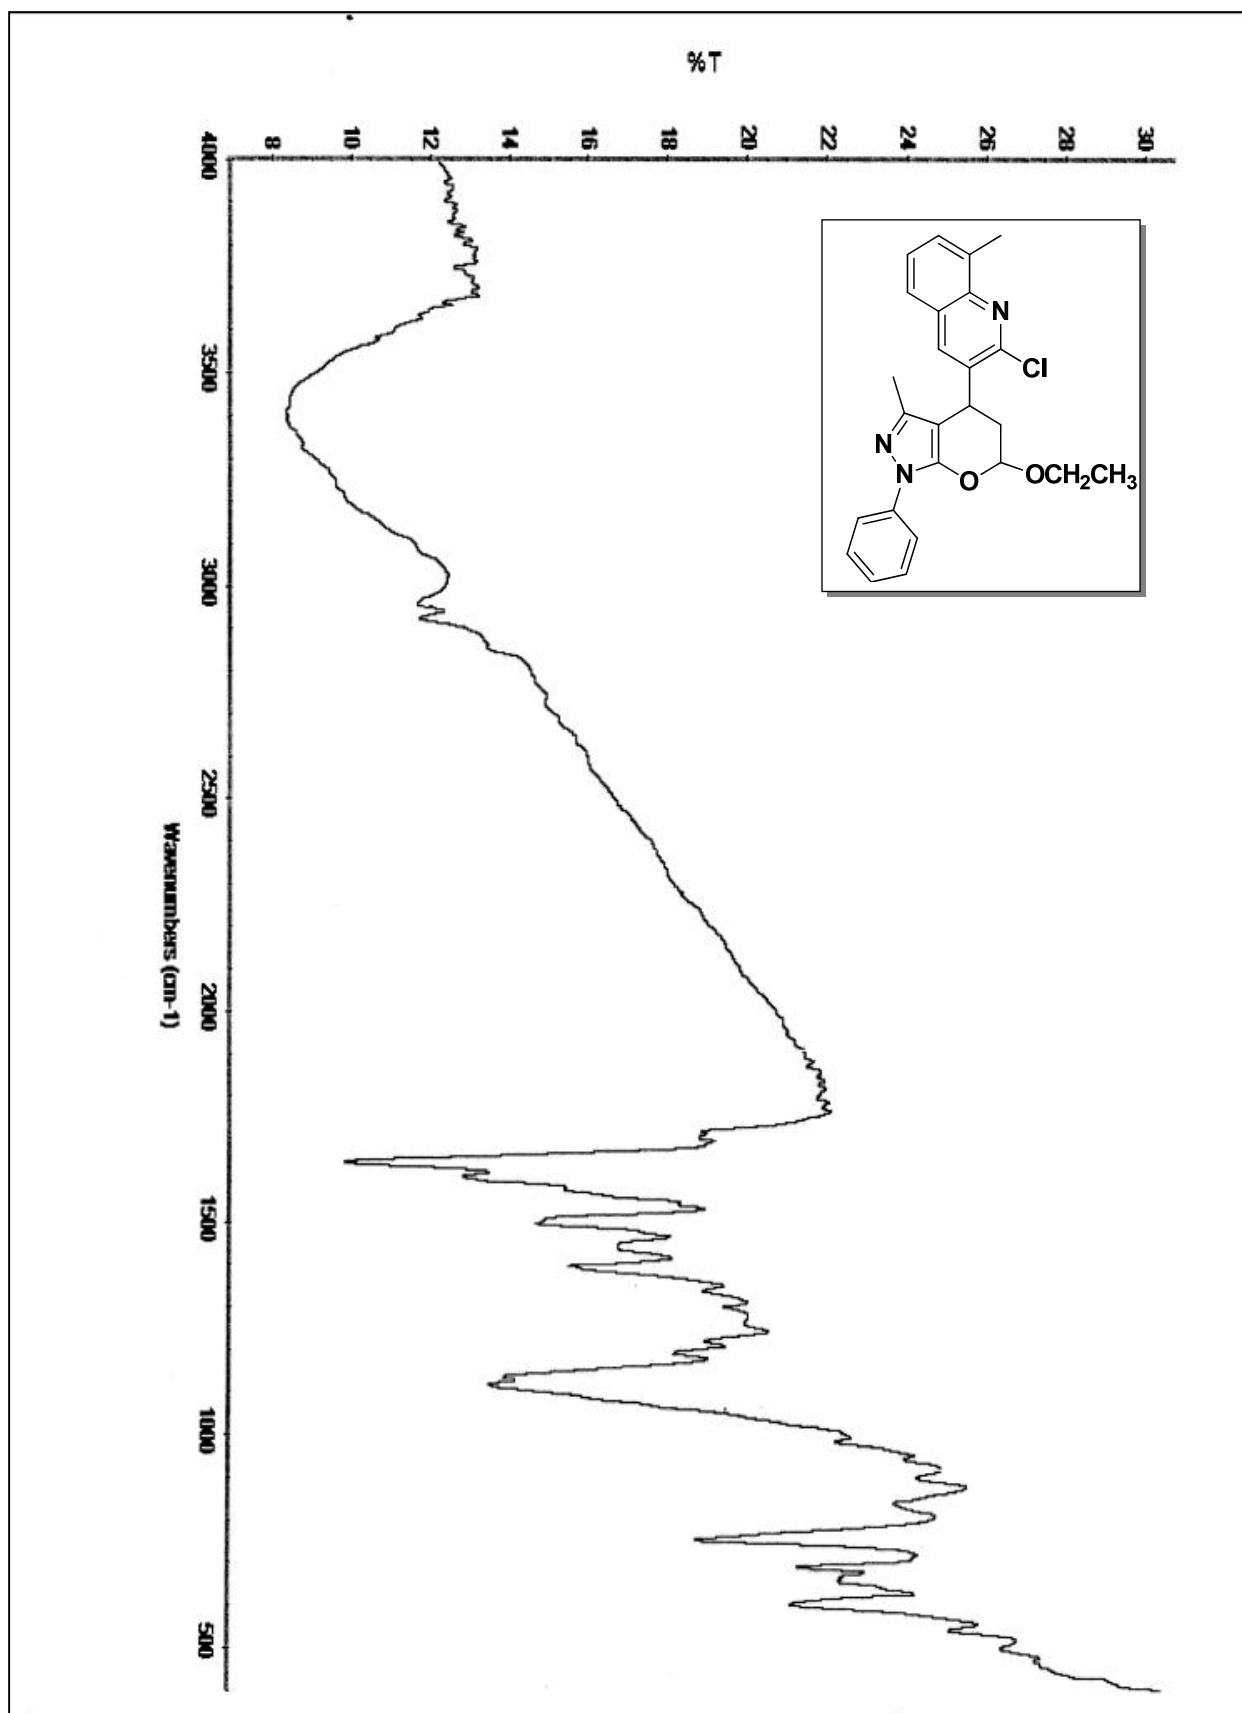

$^1\text{H-NMR}/3\text{c}/\text{CDCl}_3$

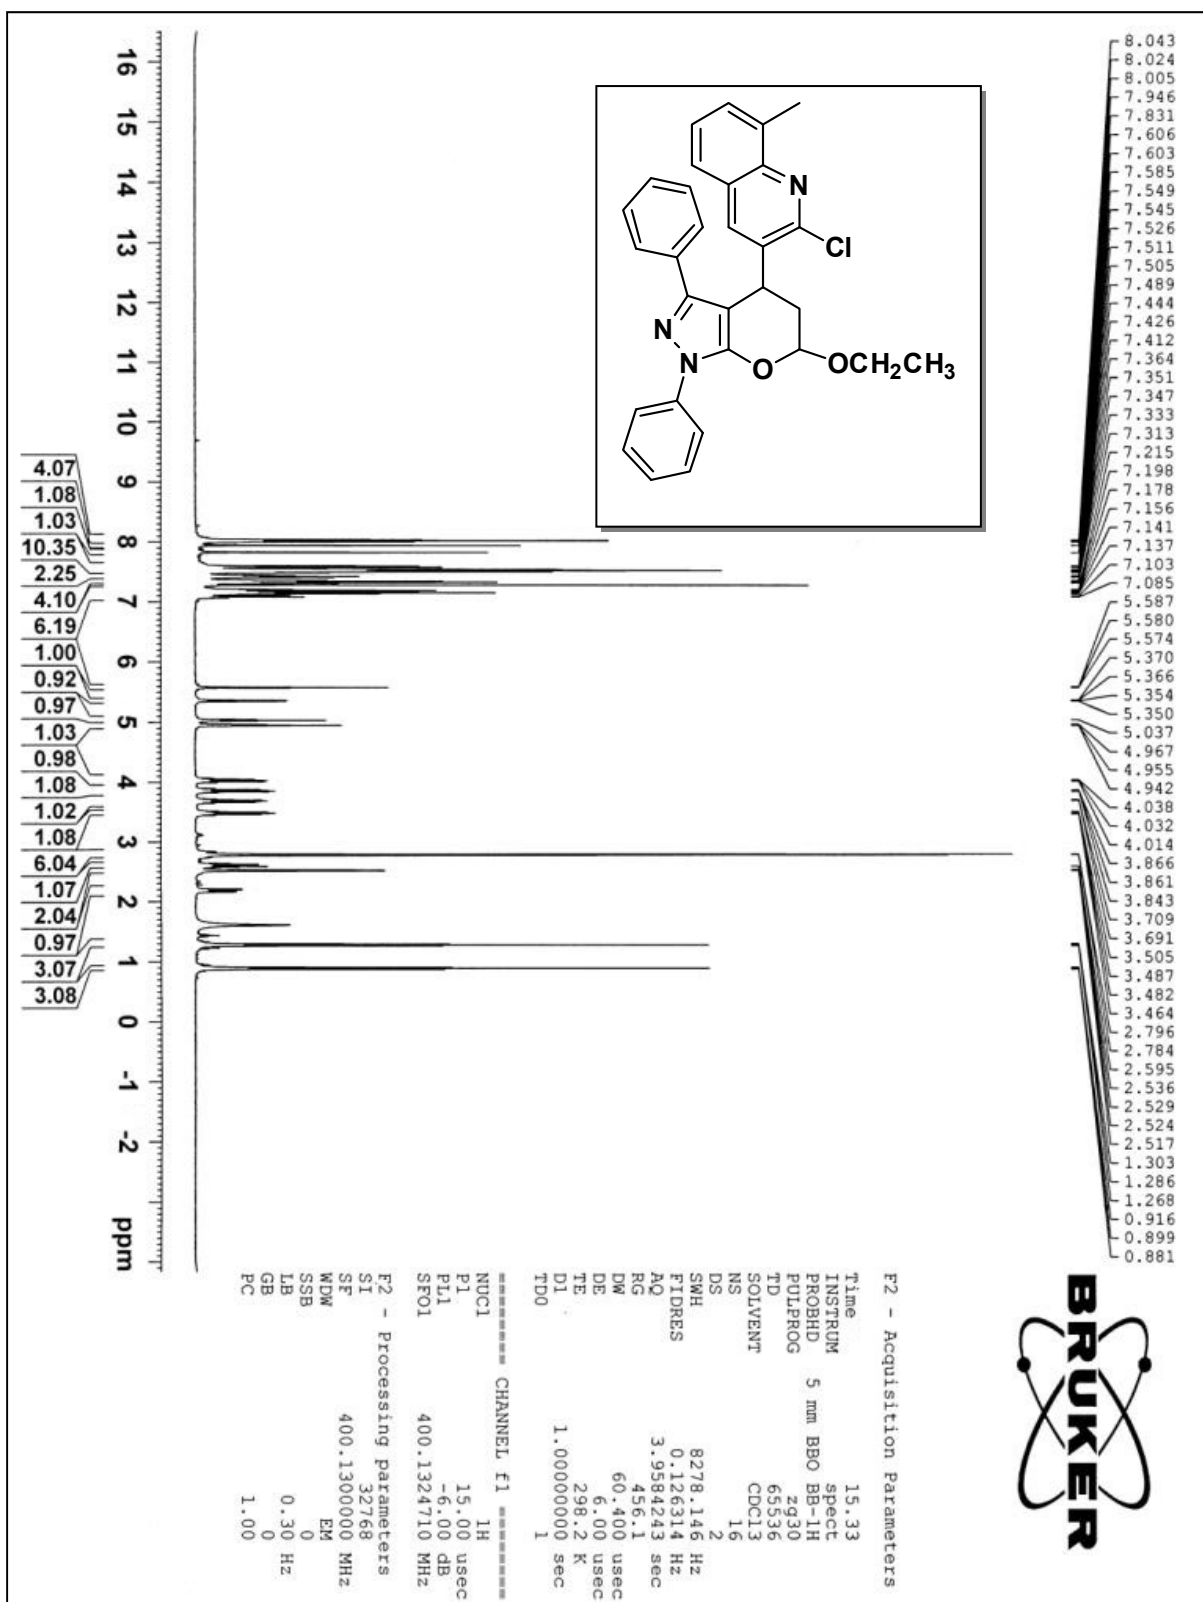

### 2D NOE for 3c

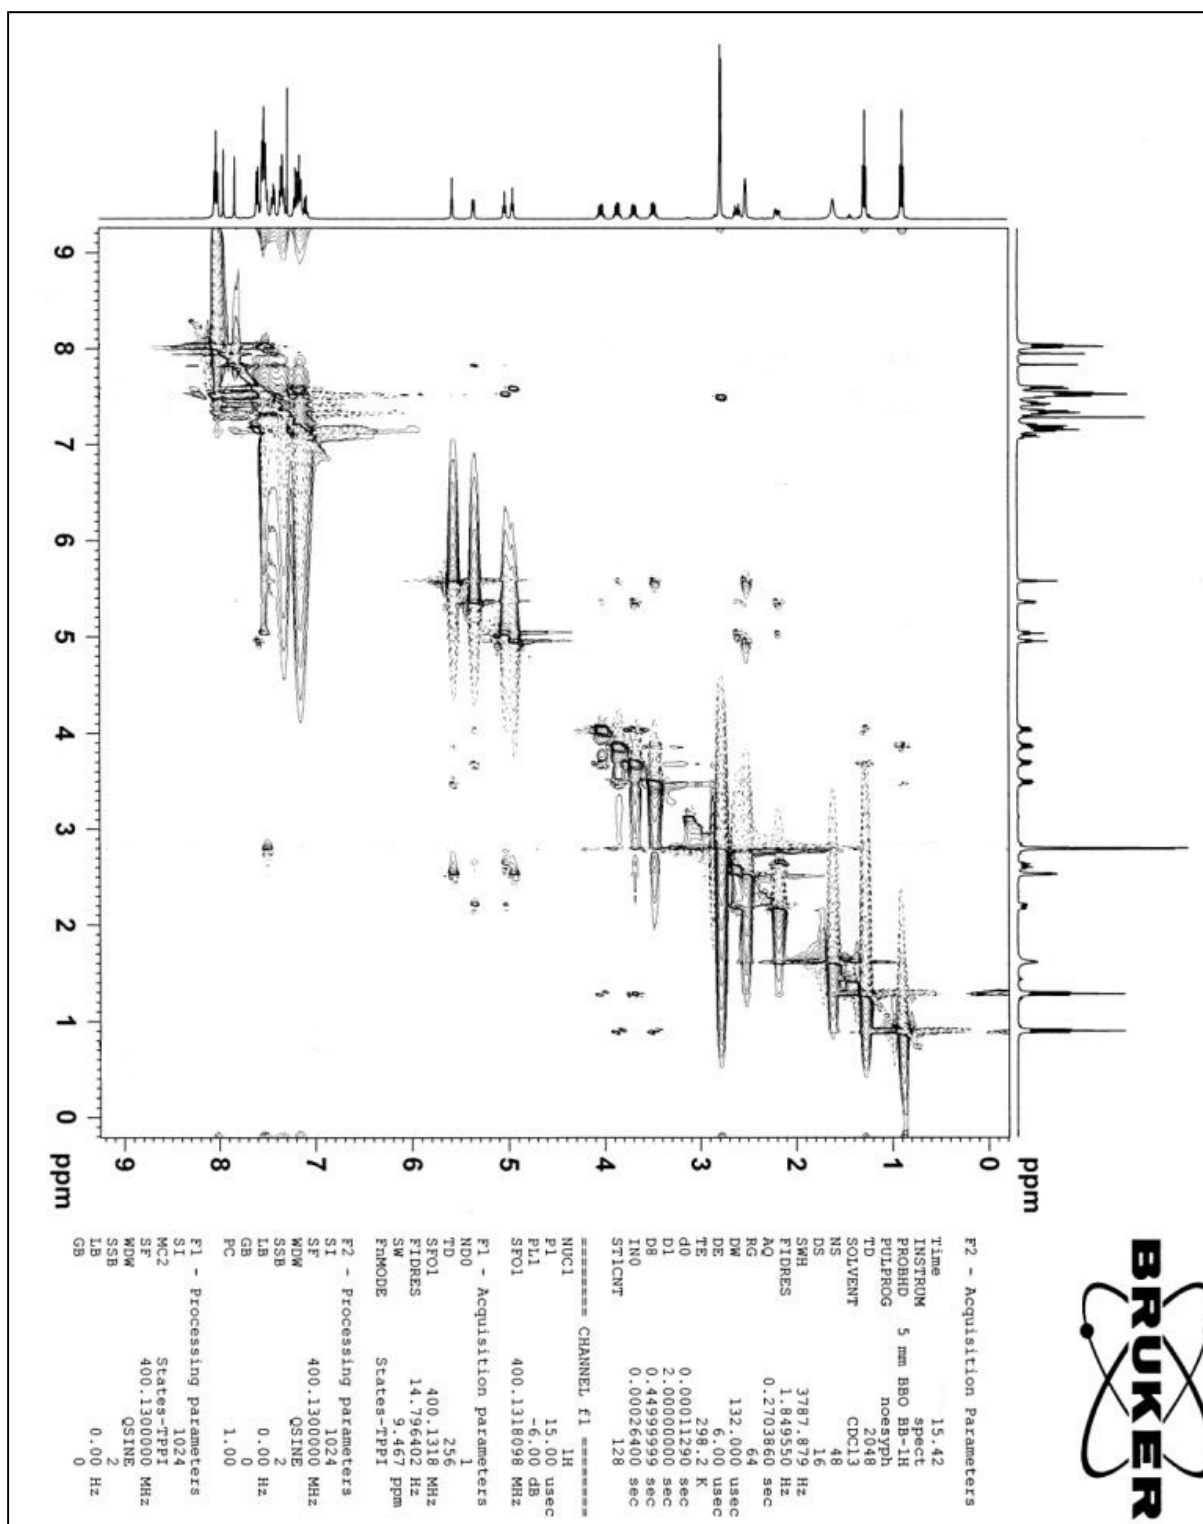

<sup>1</sup>H-NMR/4a/CDCl<sub>3</sub>

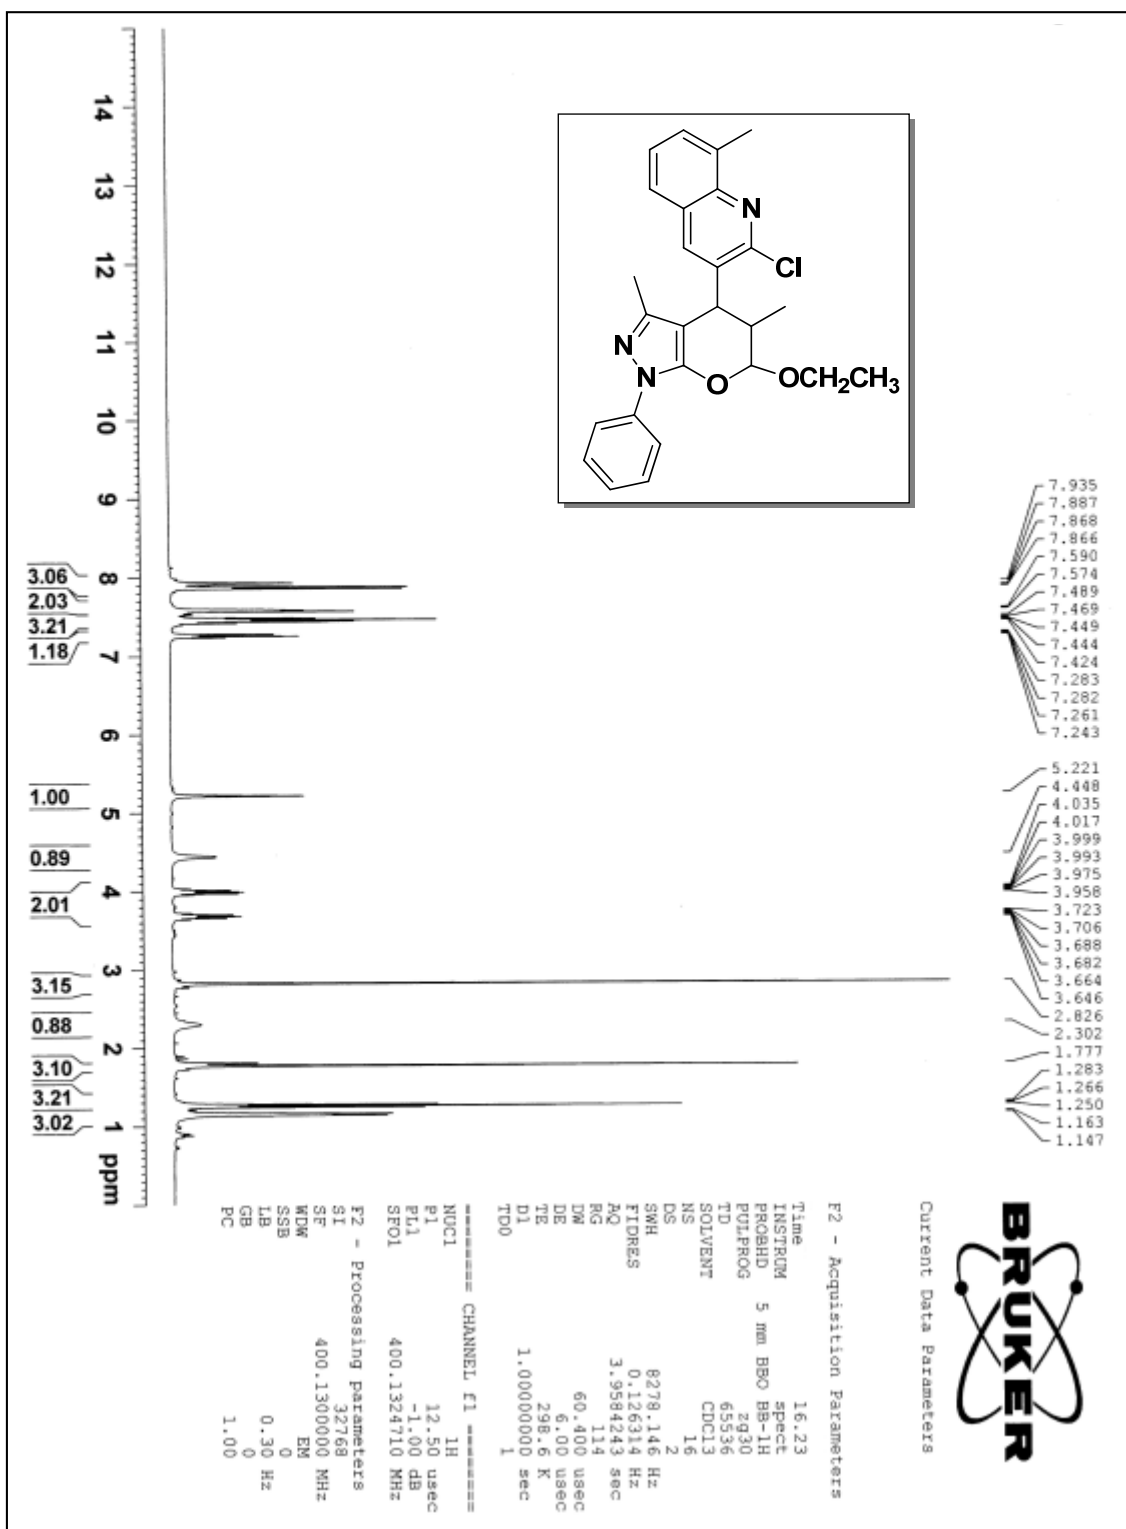

<sup>13</sup>C-NMR (DEPT-135)/4a/ CDCl<sub>3</sub>

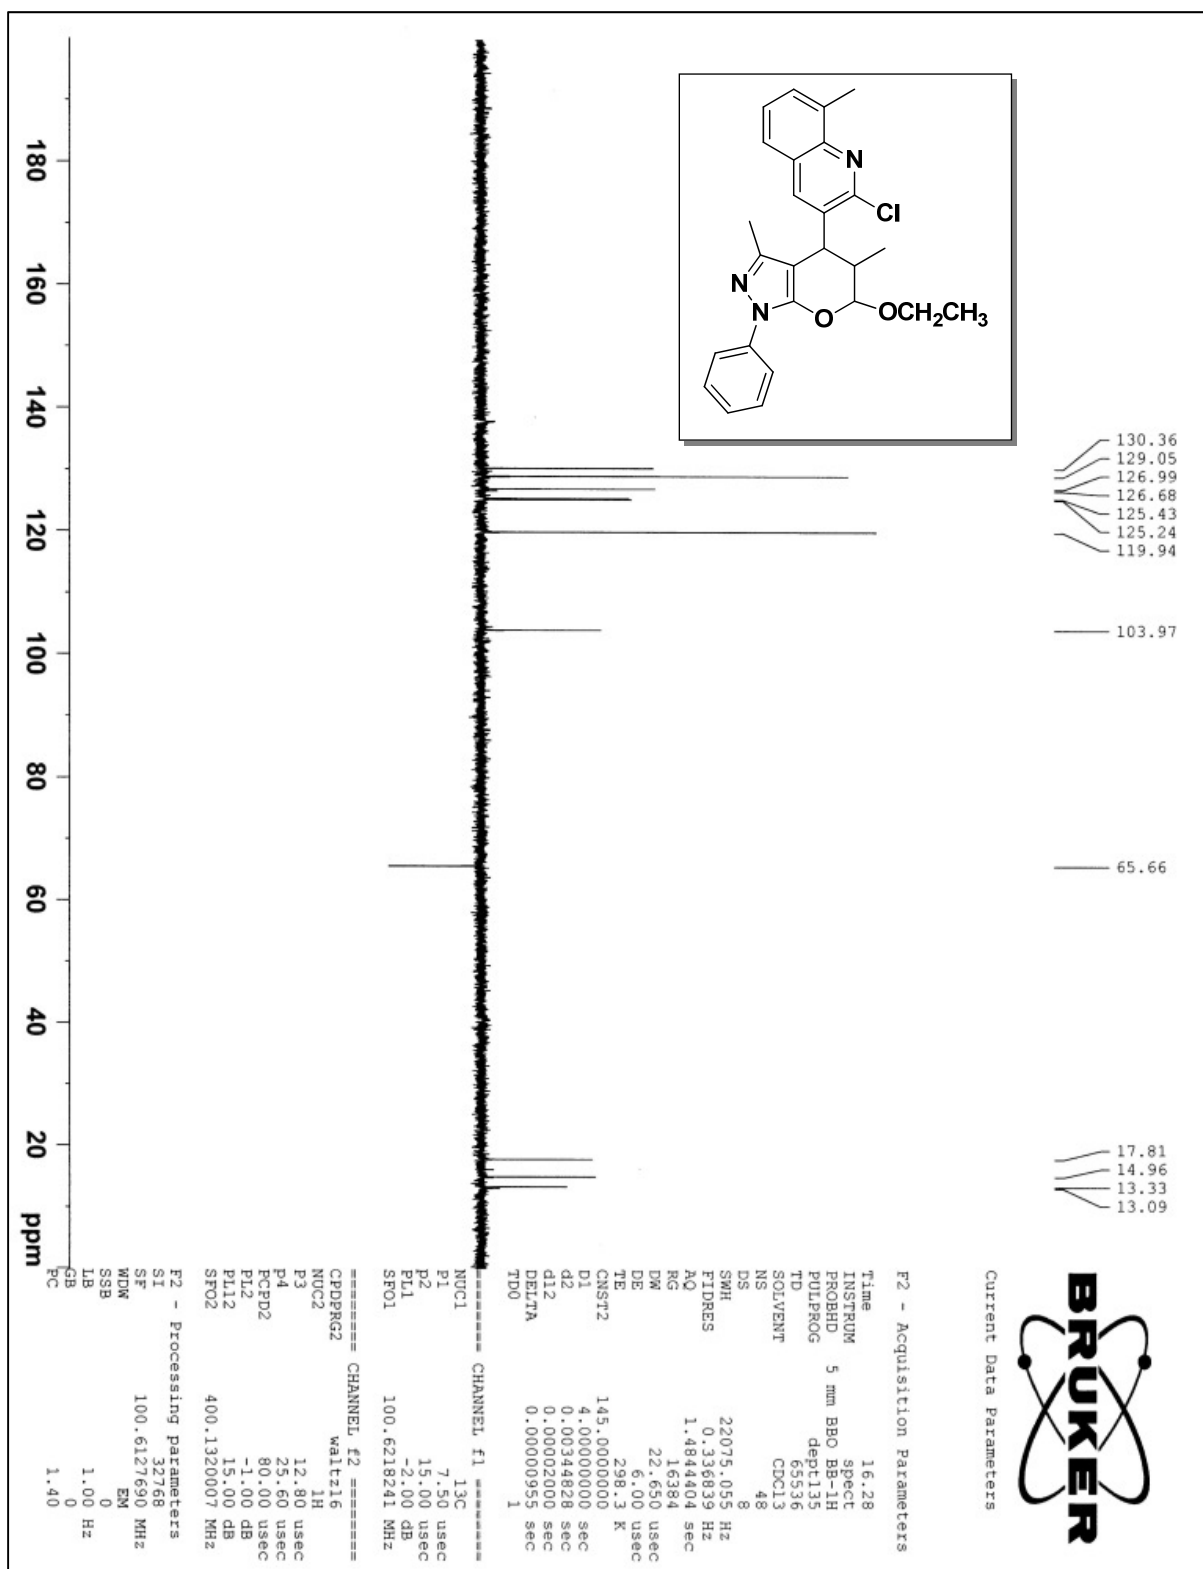

$^{13}\text{C-NMR}/4\text{a}/\text{CDCl}_3$

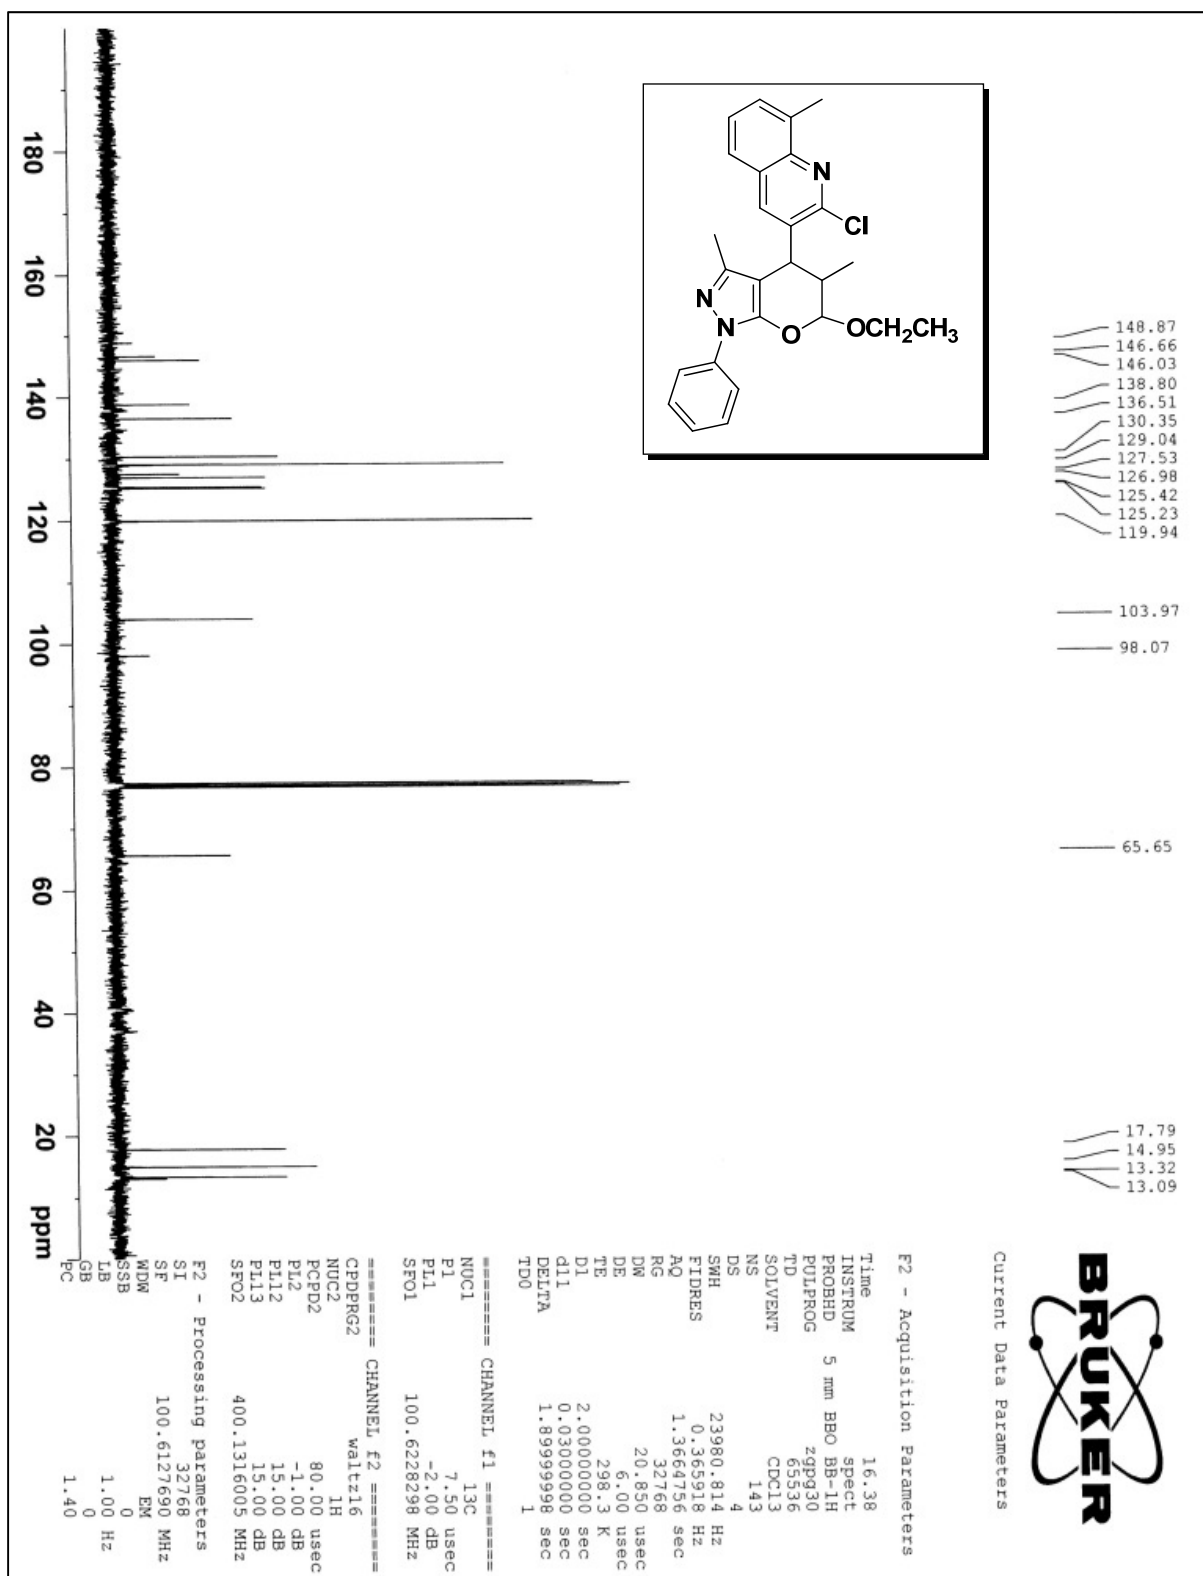



### MS/4a

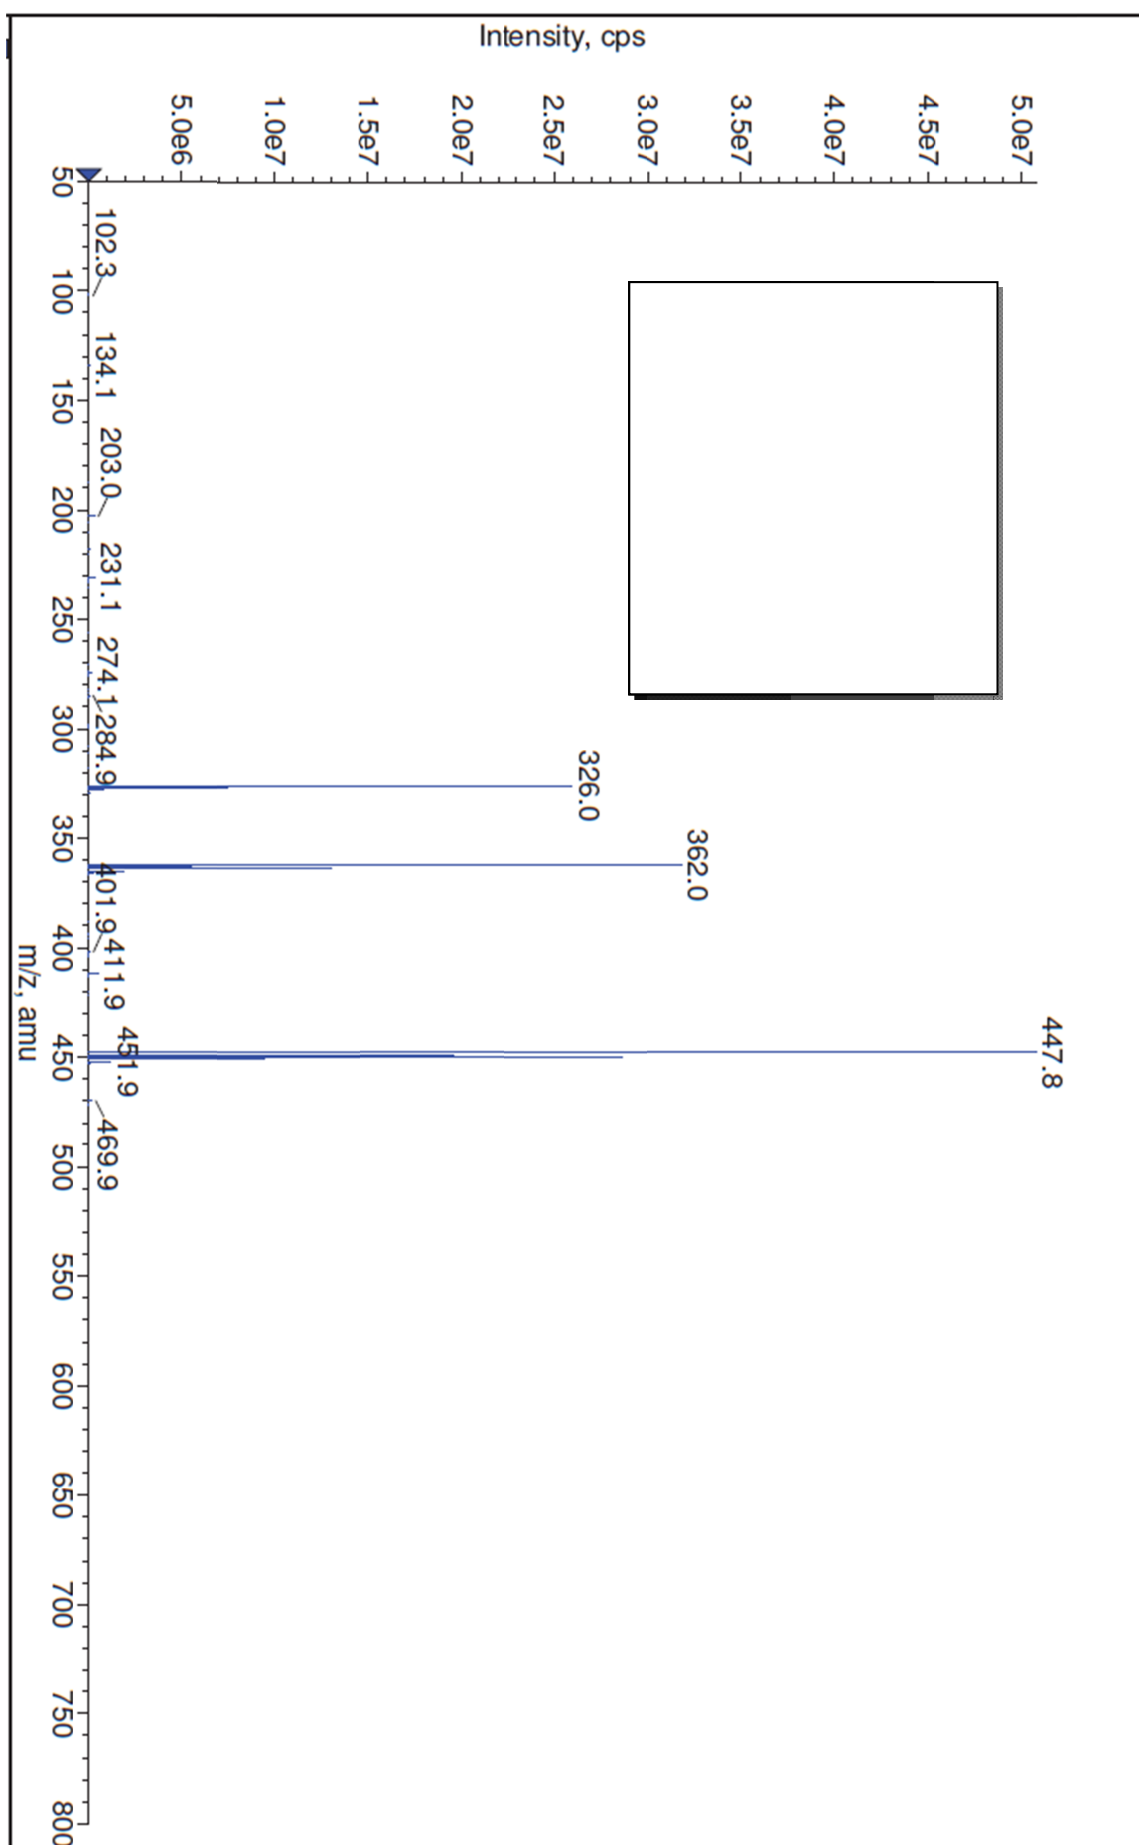

IR/4a/KBr

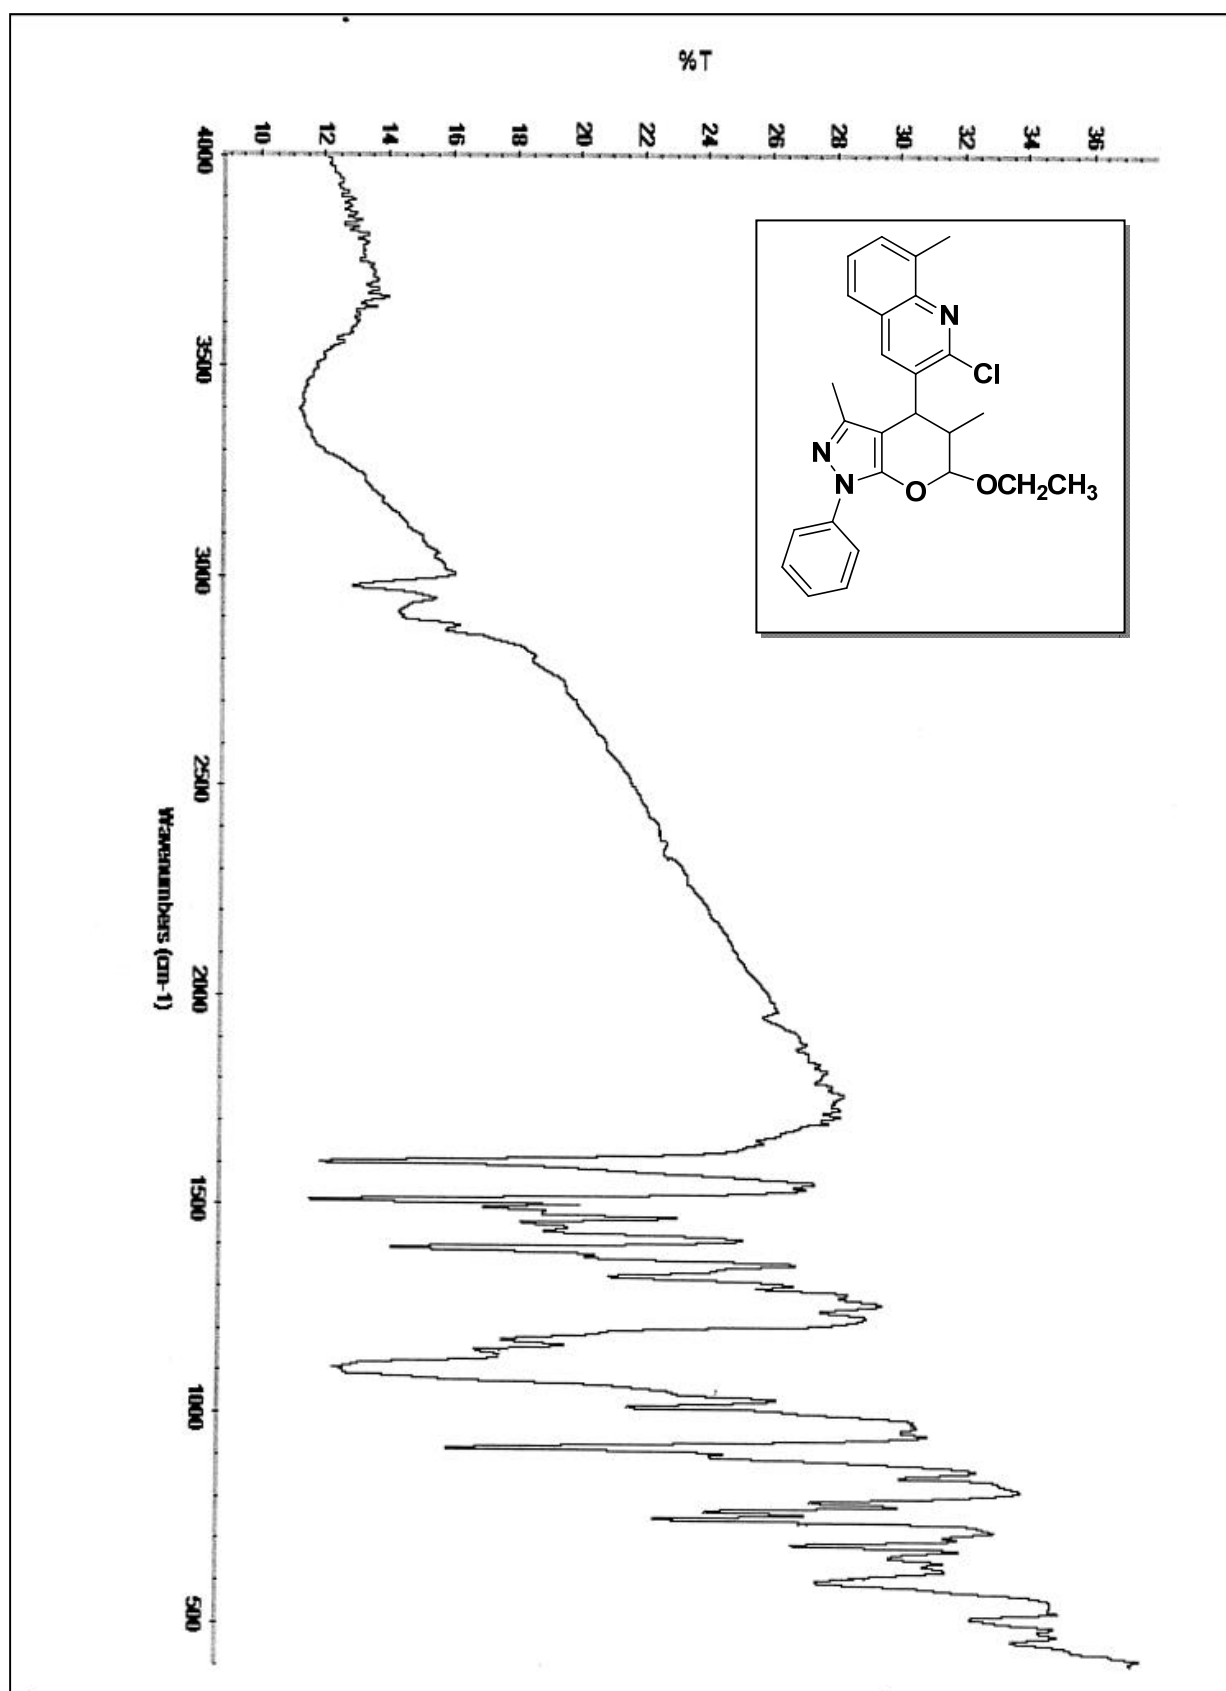

$^1\text{H-NMR}/5\text{a}/\text{CDCl}_3$

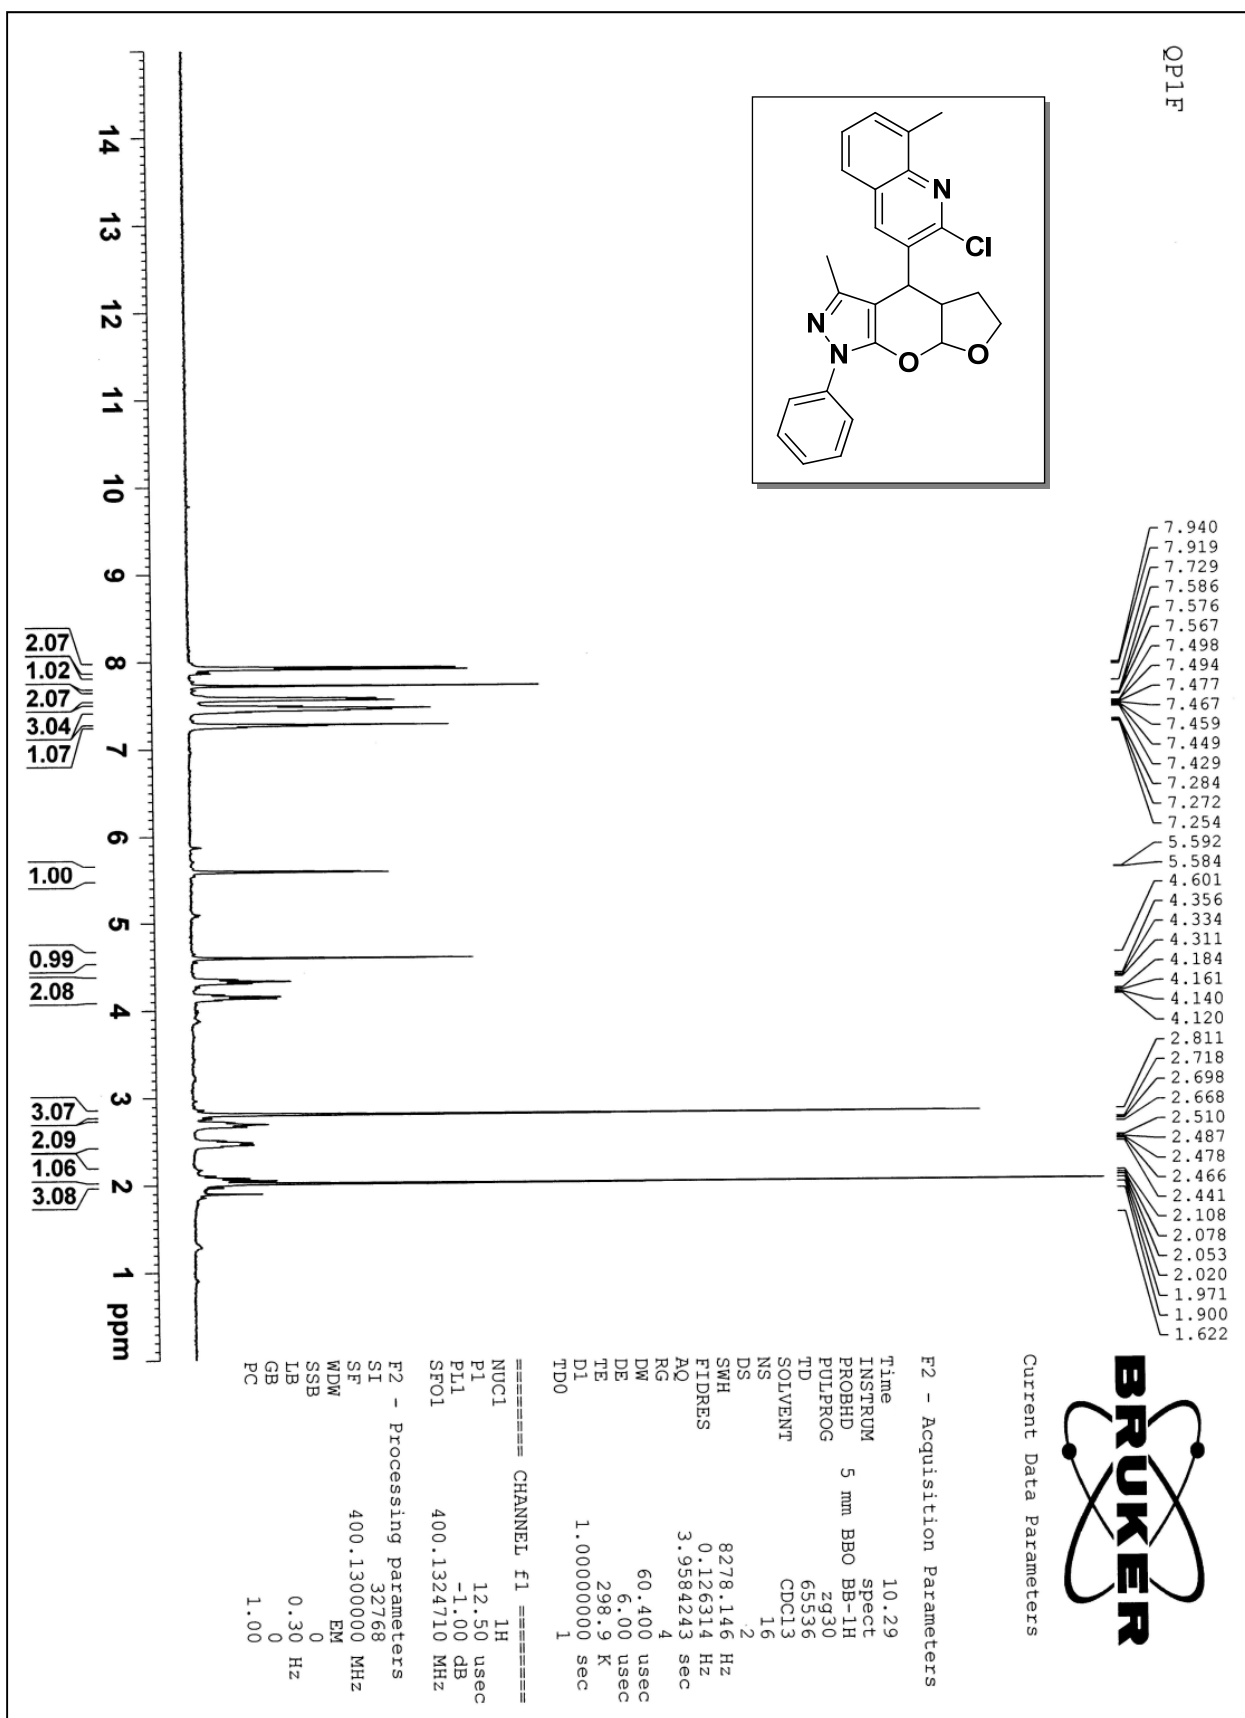

<sup>13</sup>C-NMR (DEPT-135)/ **5a**/ CDCl<sub>3</sub>

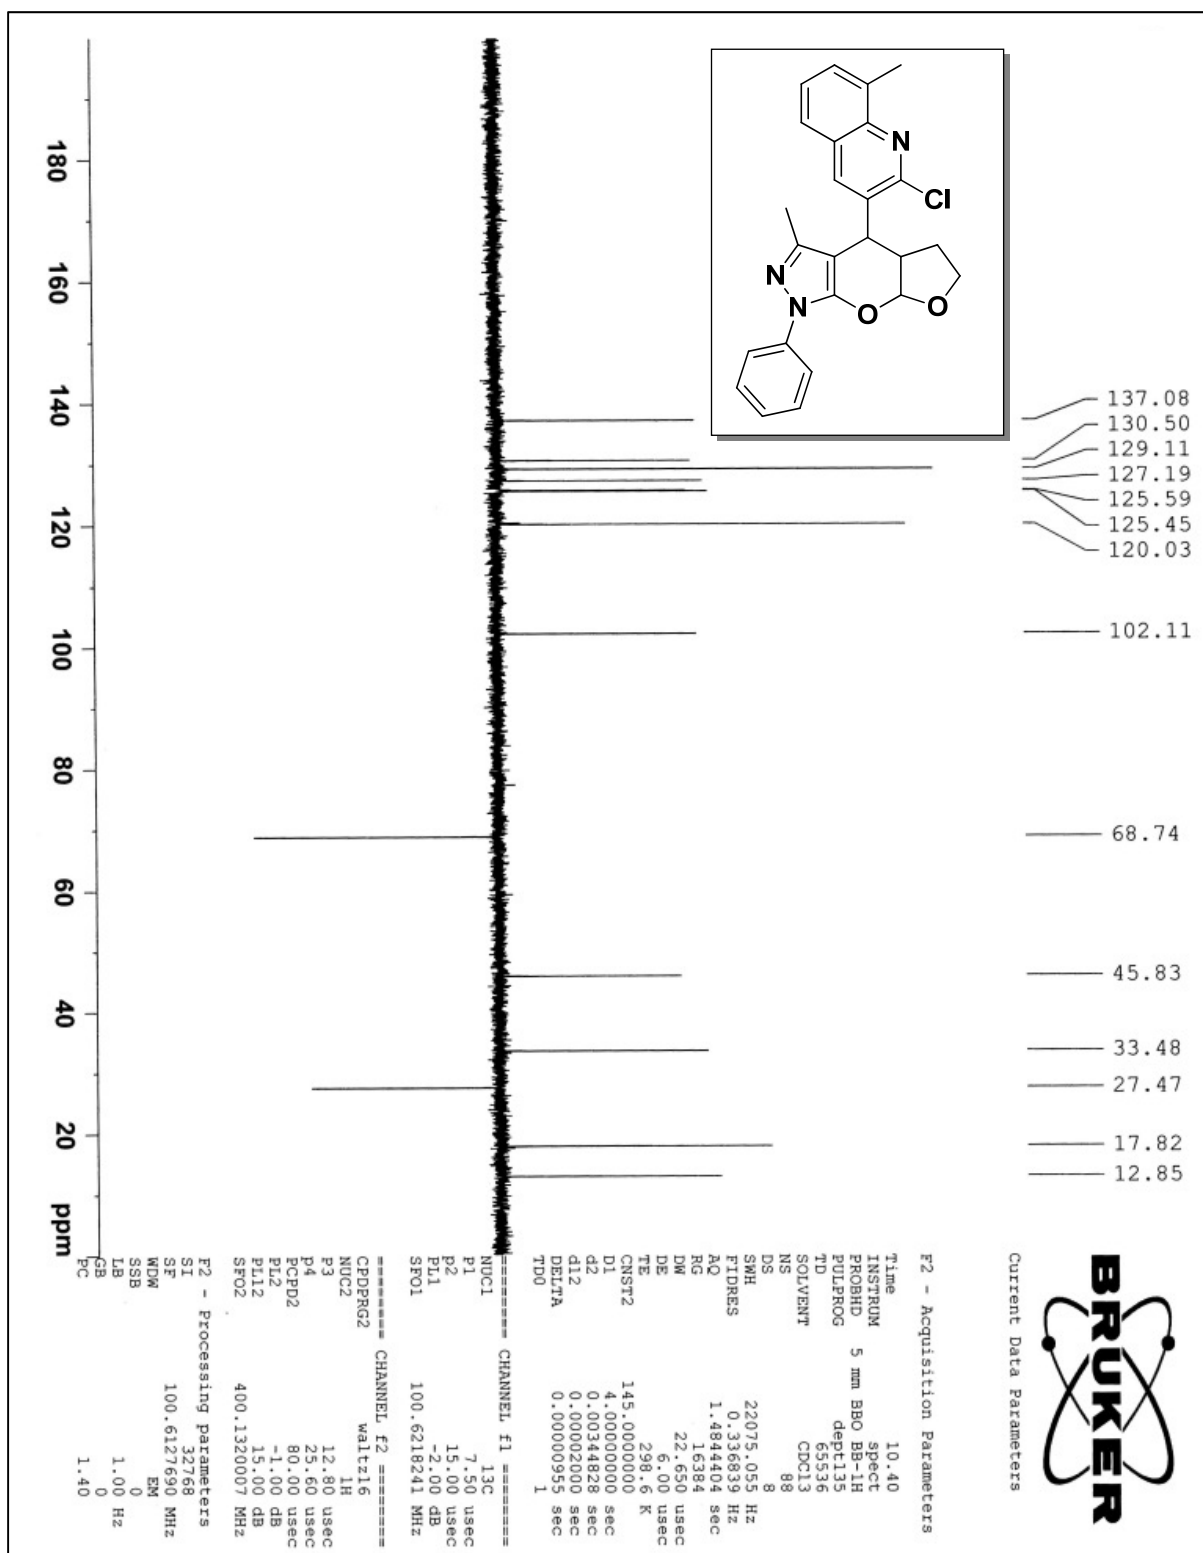

$^{13}\text{C-NMR}/5\text{a}/\text{CDCl}_3$

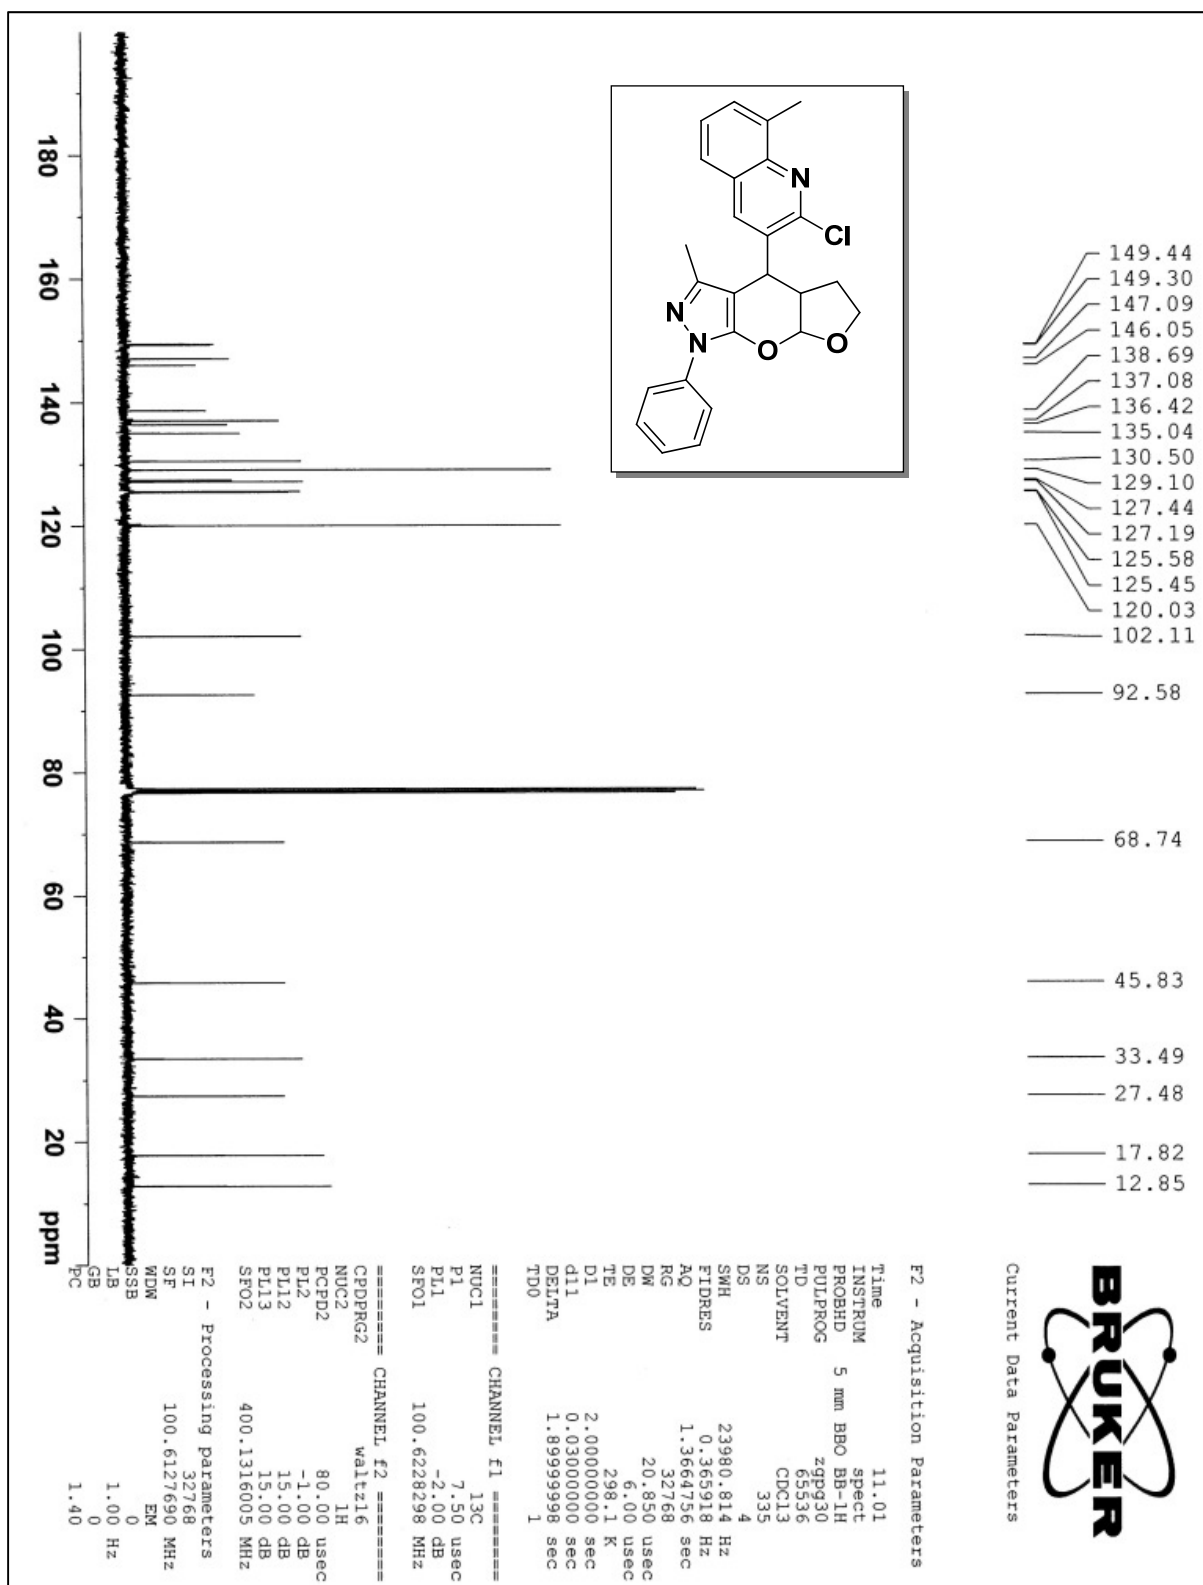

### MS/5a

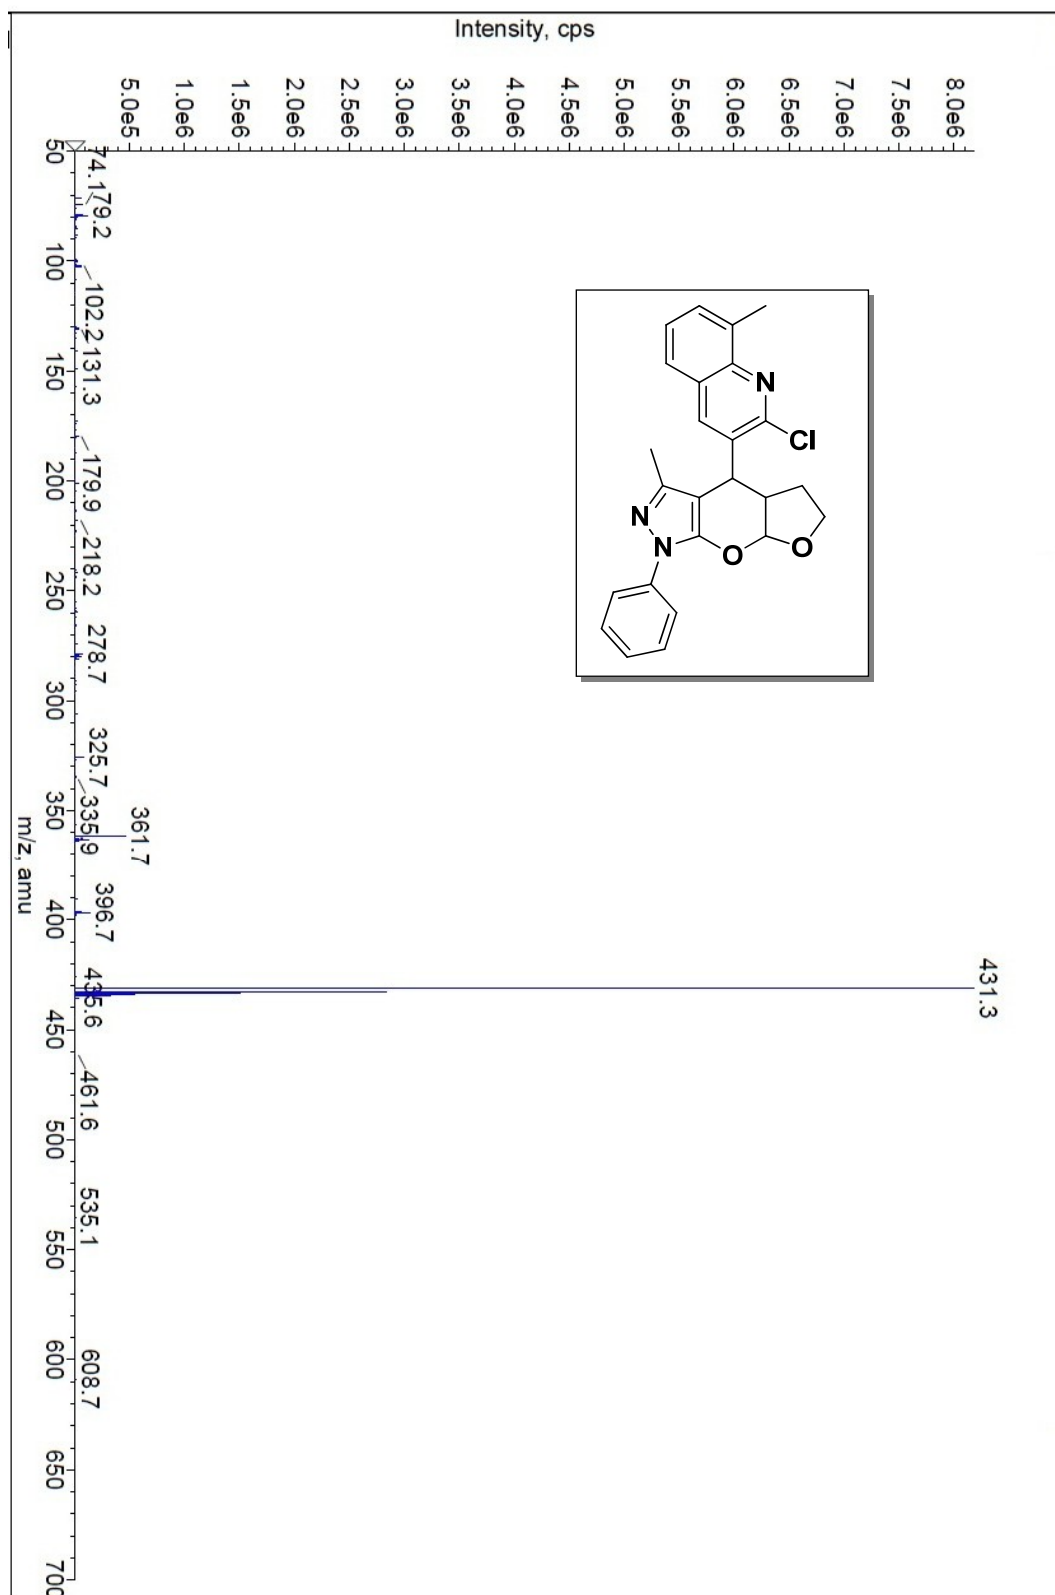

IR/5a/KBr

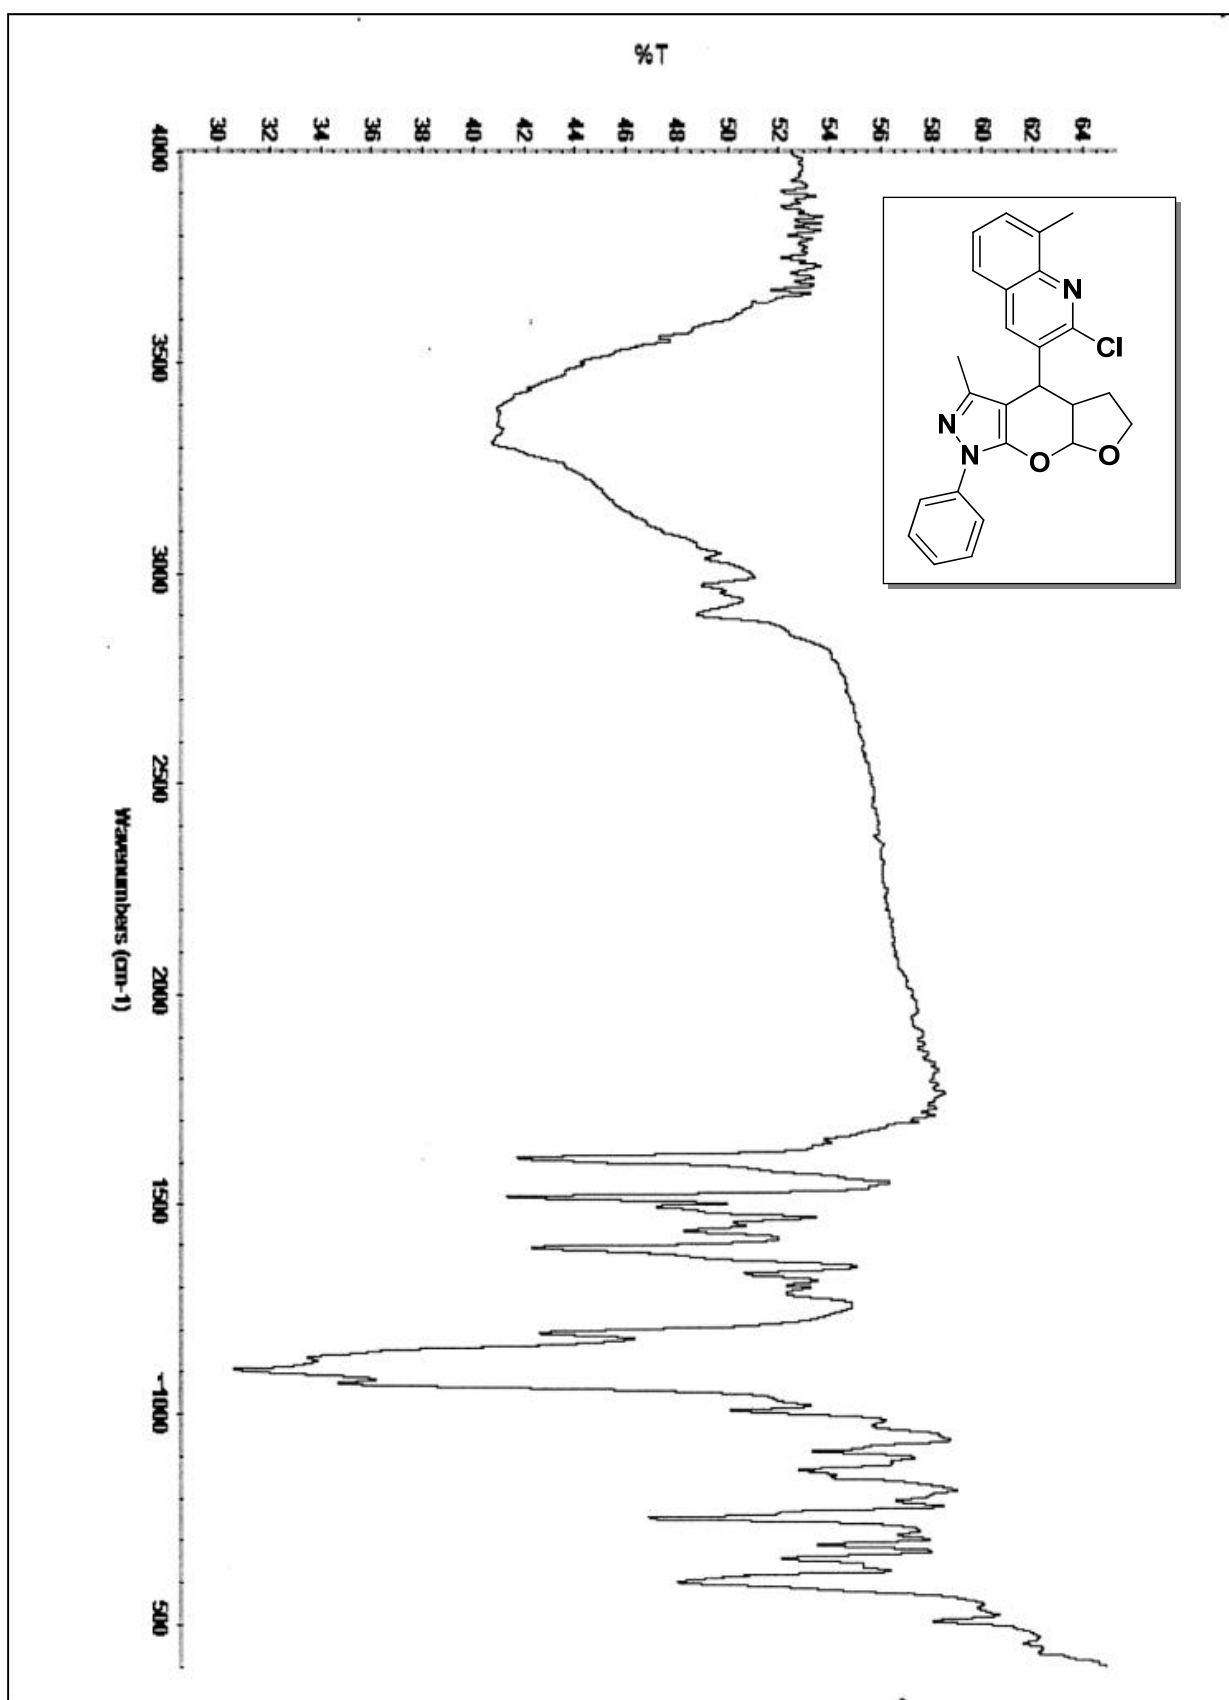

$^1\text{H-NMR}/5\text{c}/\text{CDCl}_3$

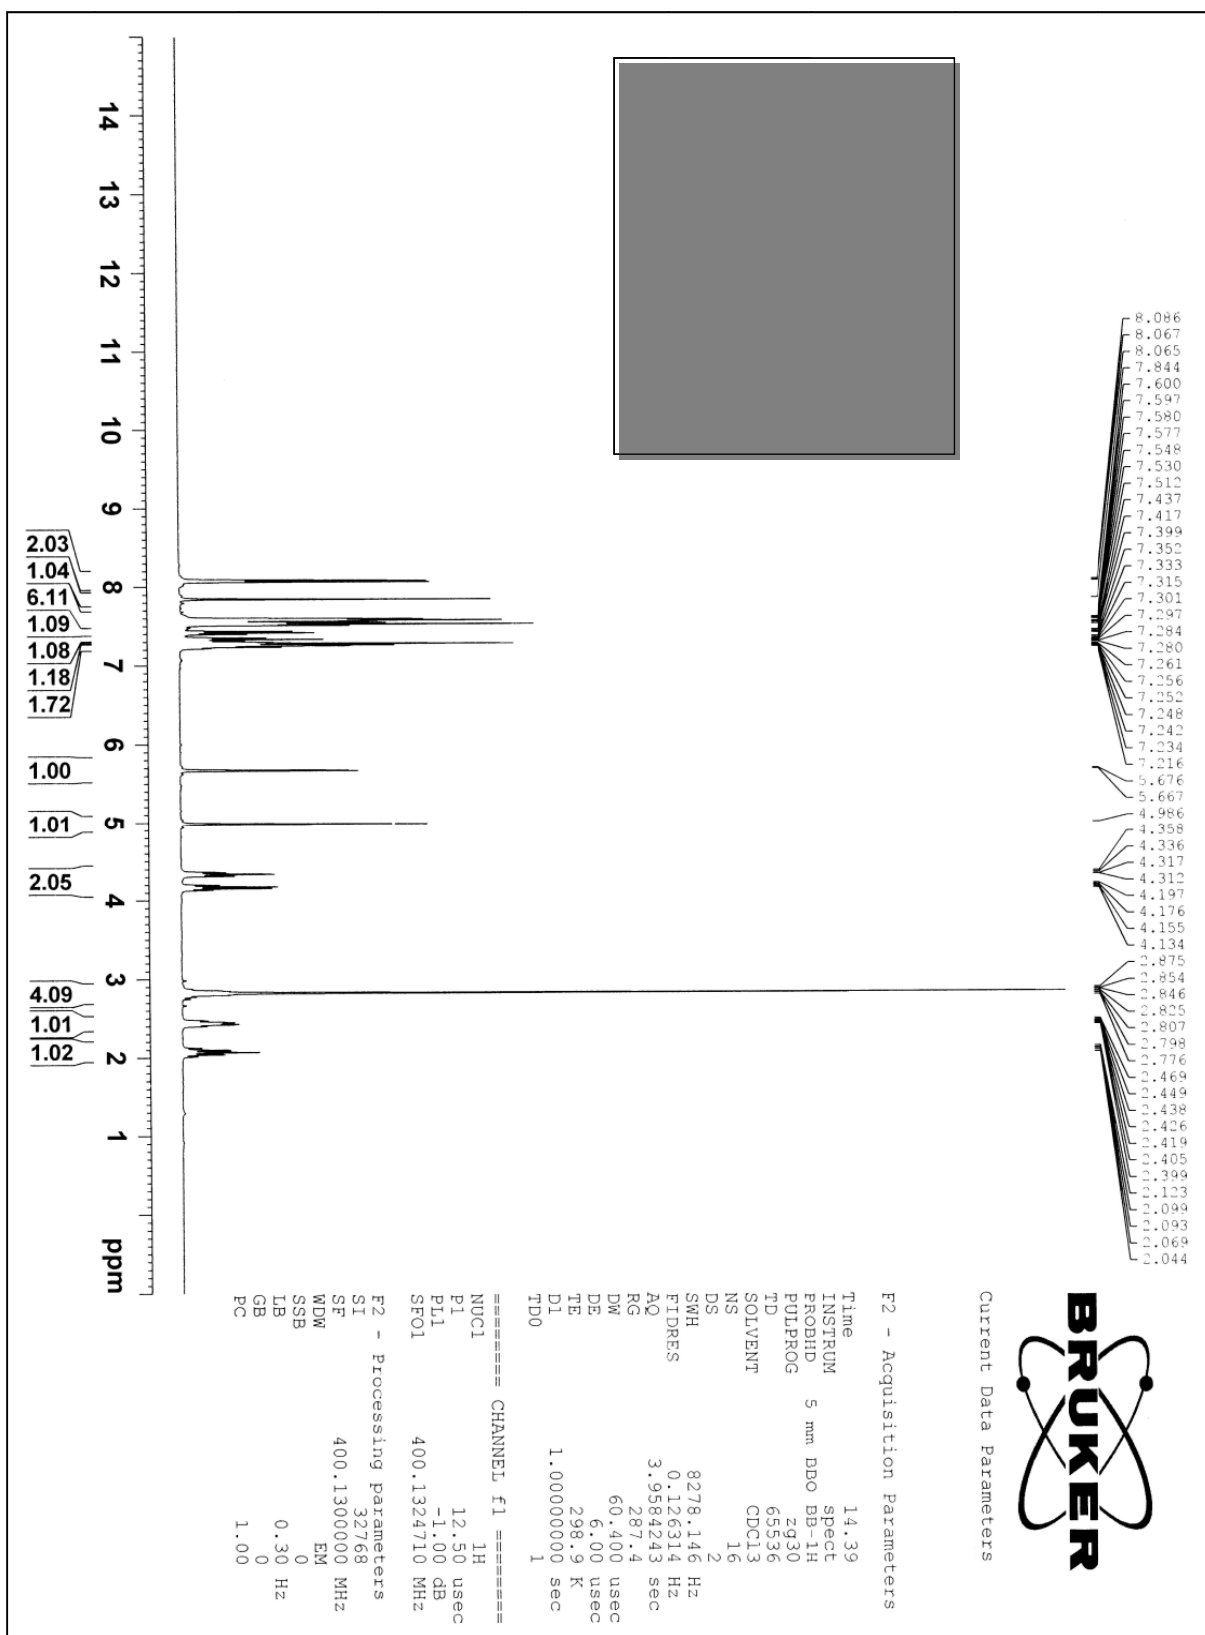



<sup>13</sup>C-NMR (DEPT-135)/5c/ CDCl<sub>3</sub>

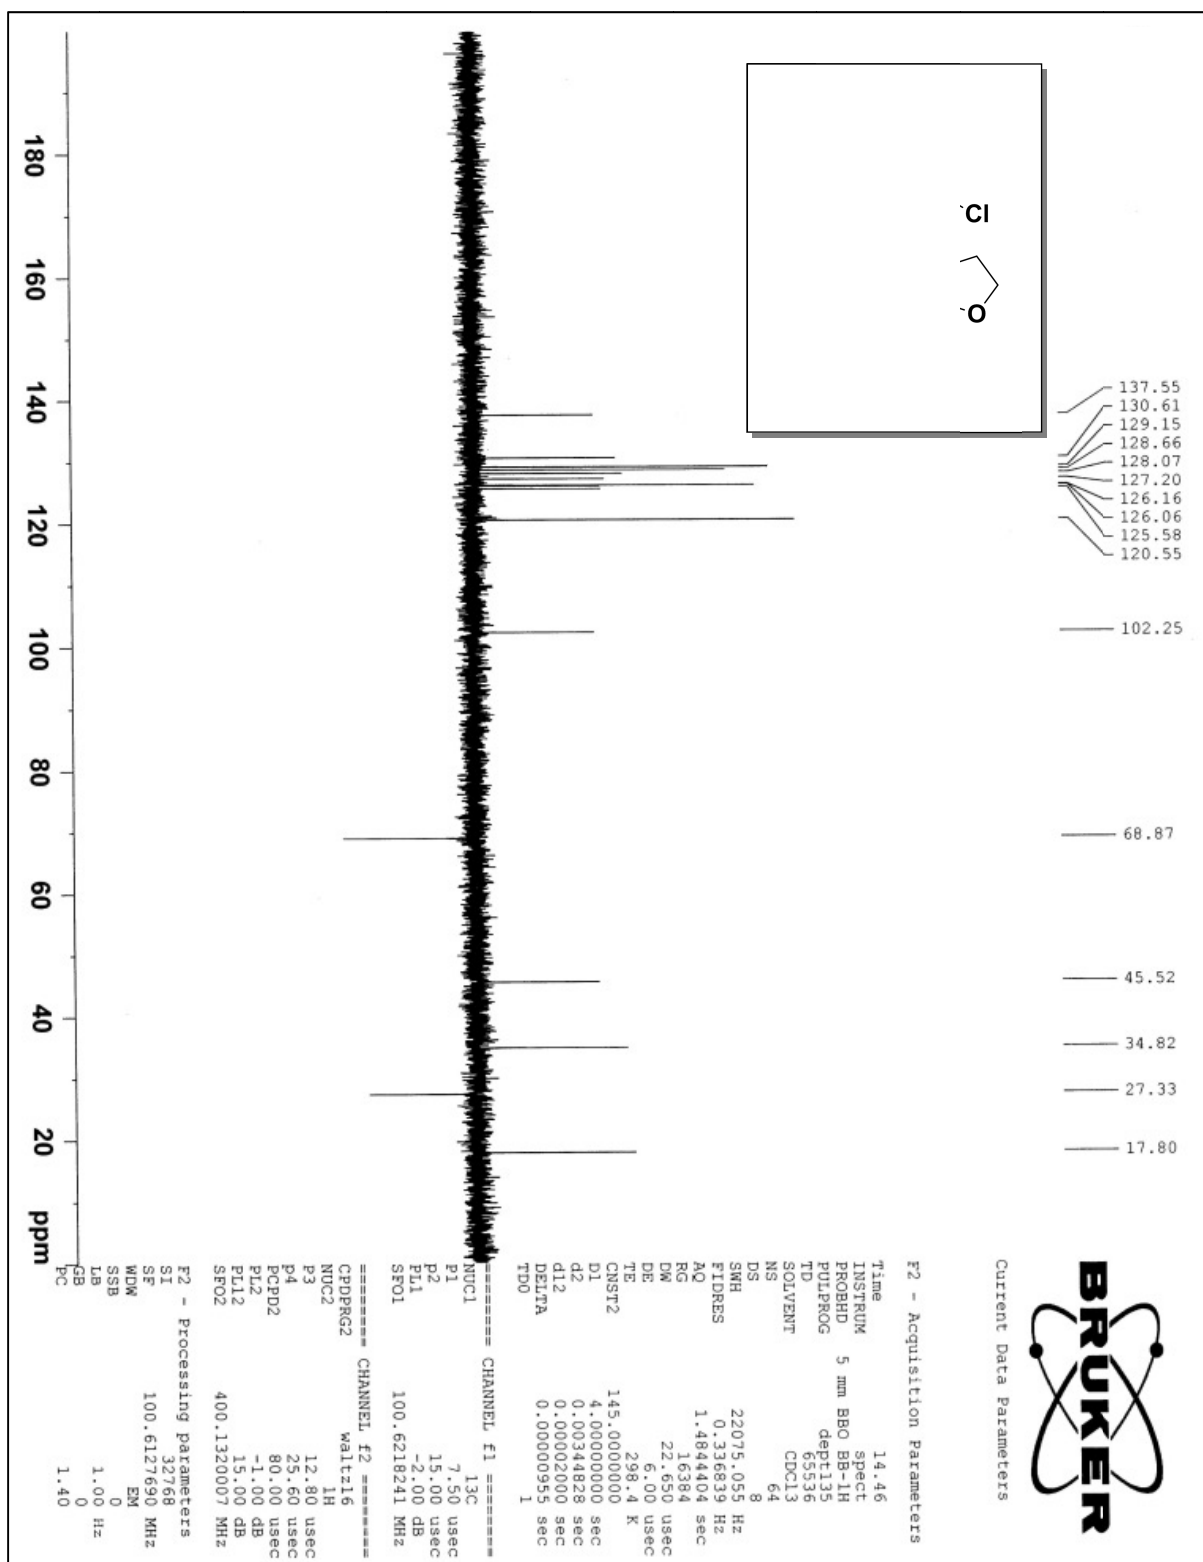

$^{13}\text{C-NMR}/5\text{c}/\text{CDCl}_3$

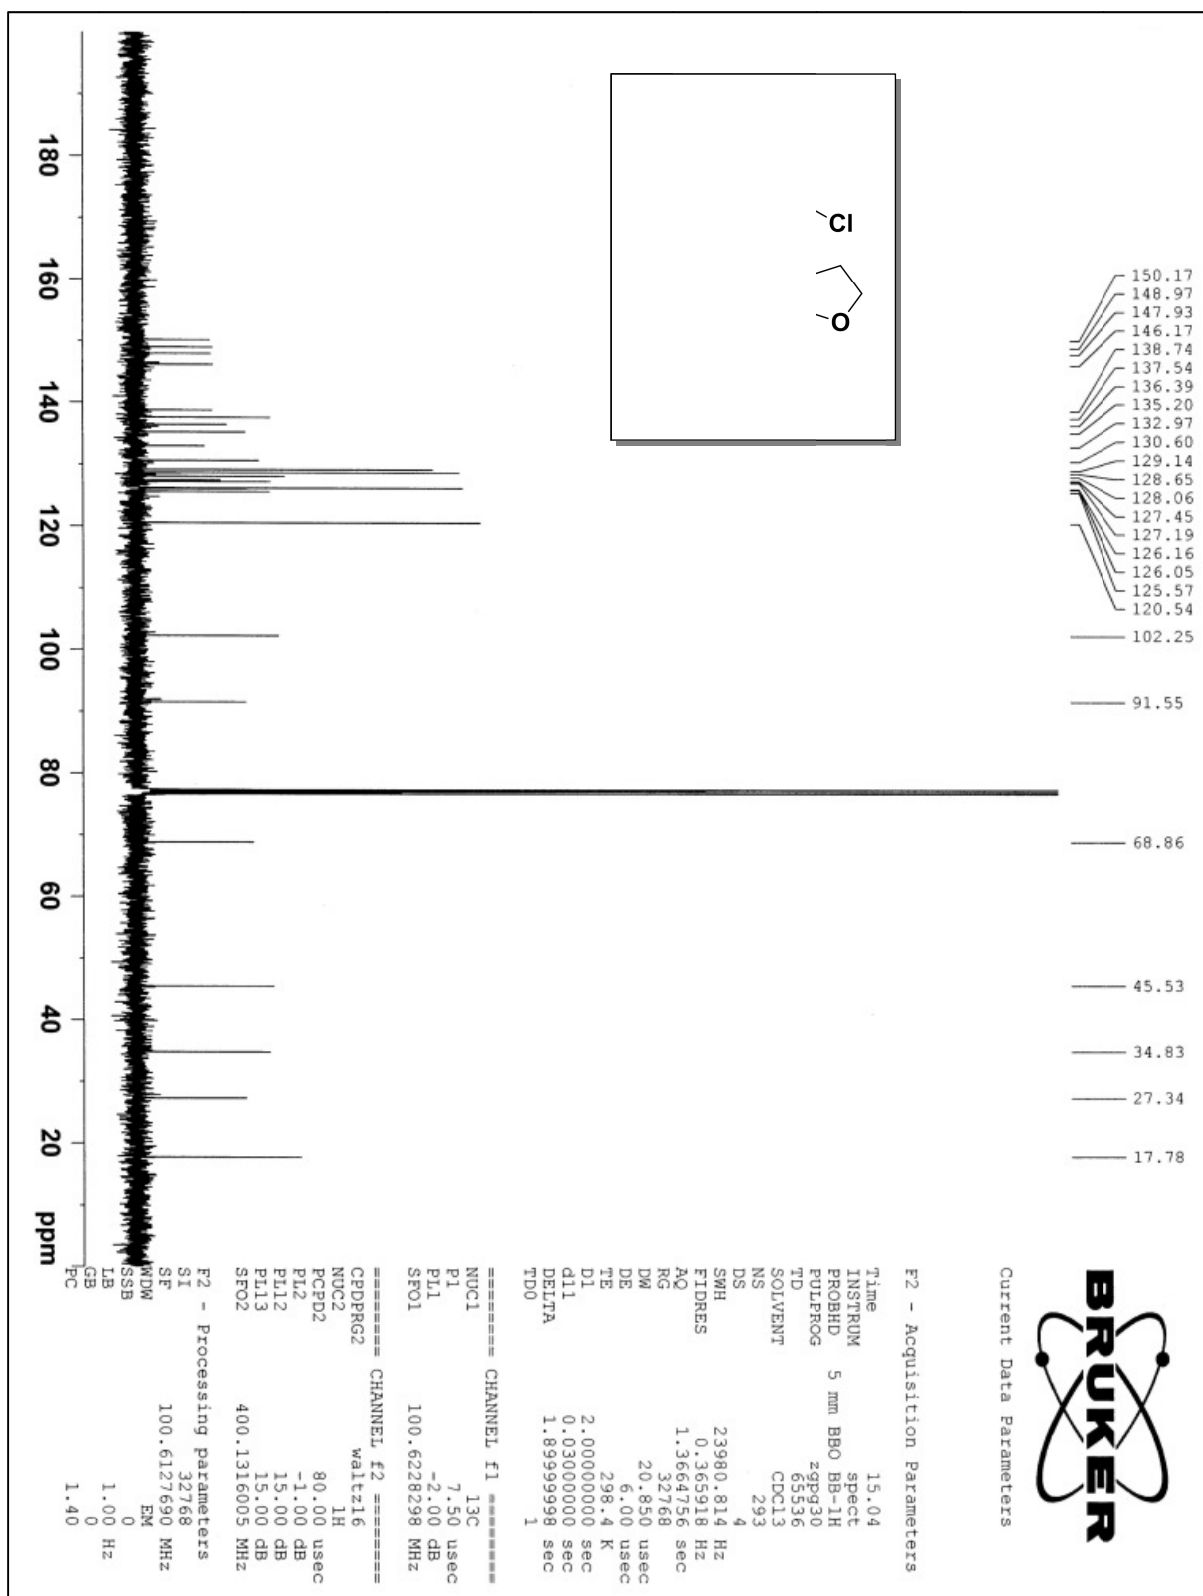

IR/5c/ KBr

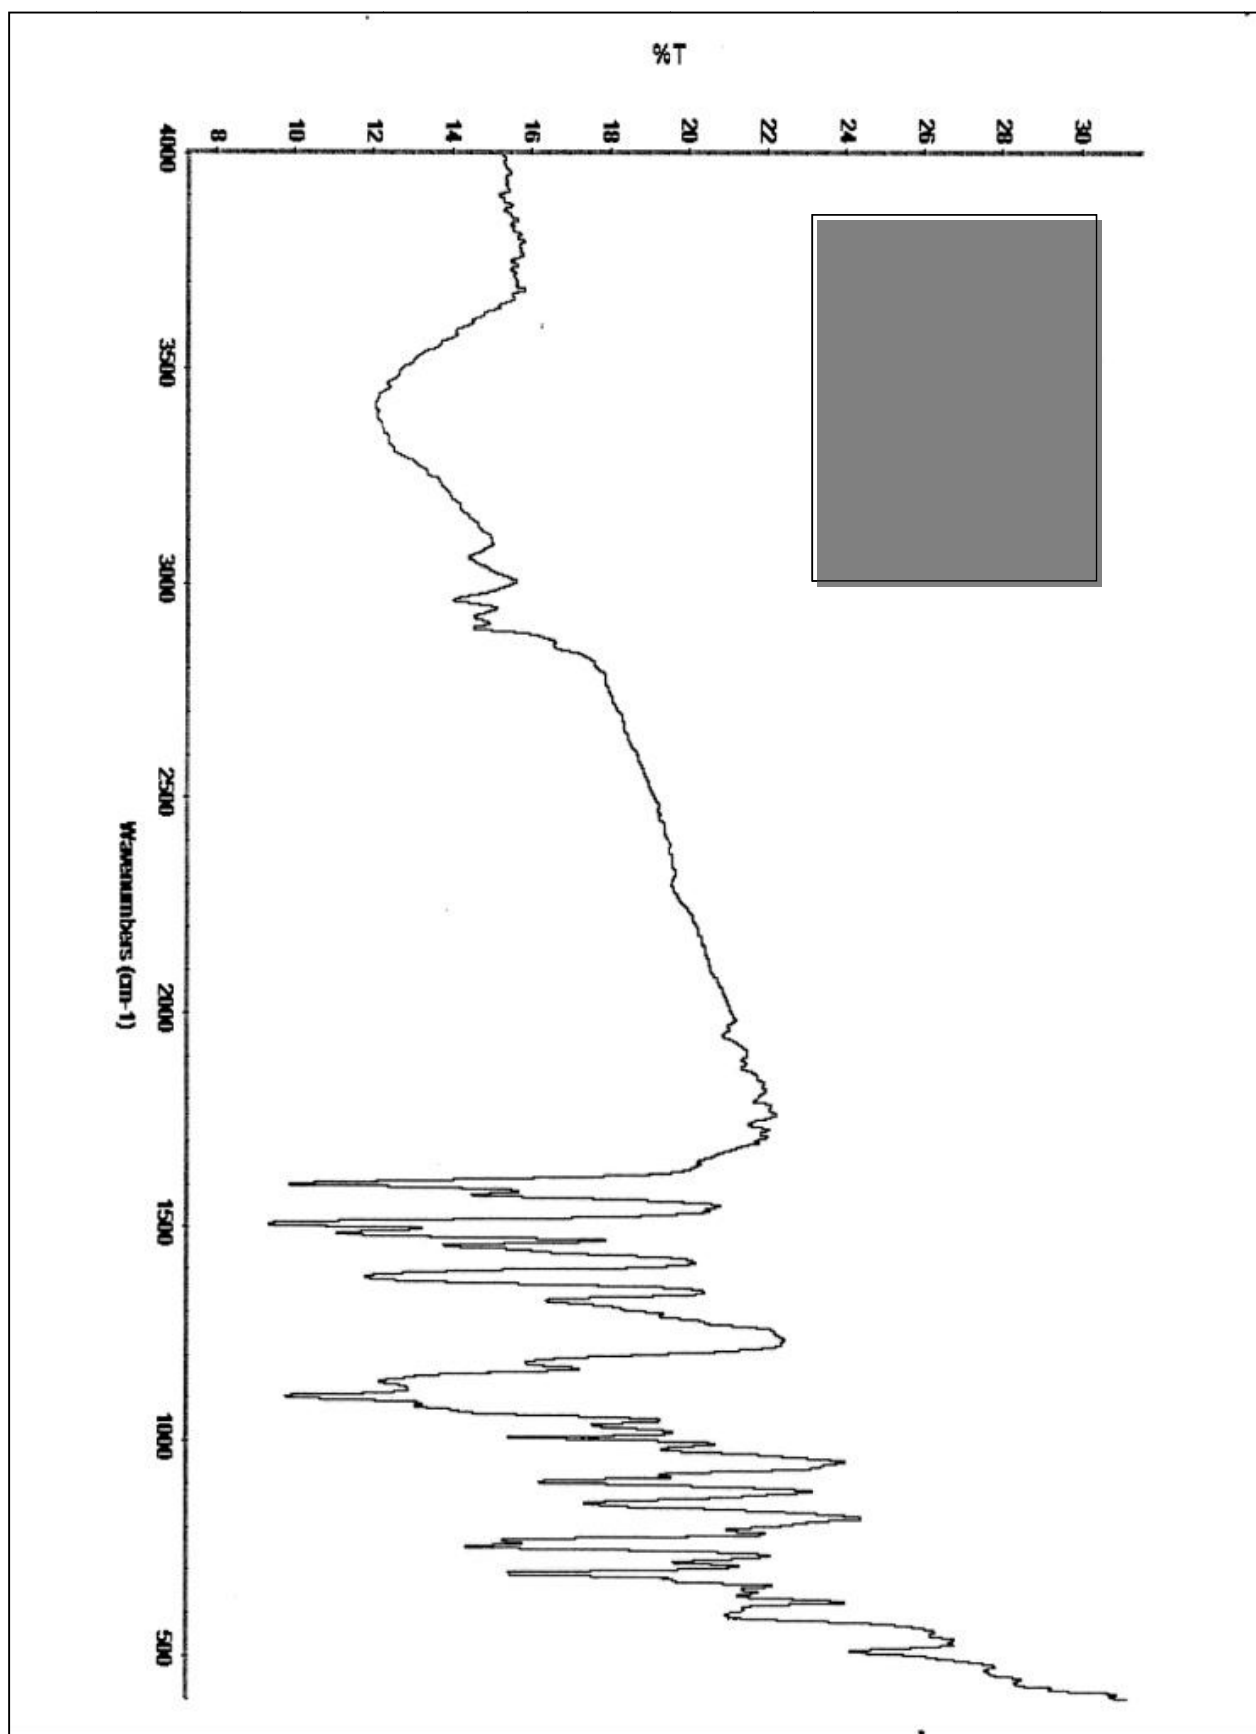

<sup>1</sup>H-NMR/7a/CDCI<sub>3</sub>

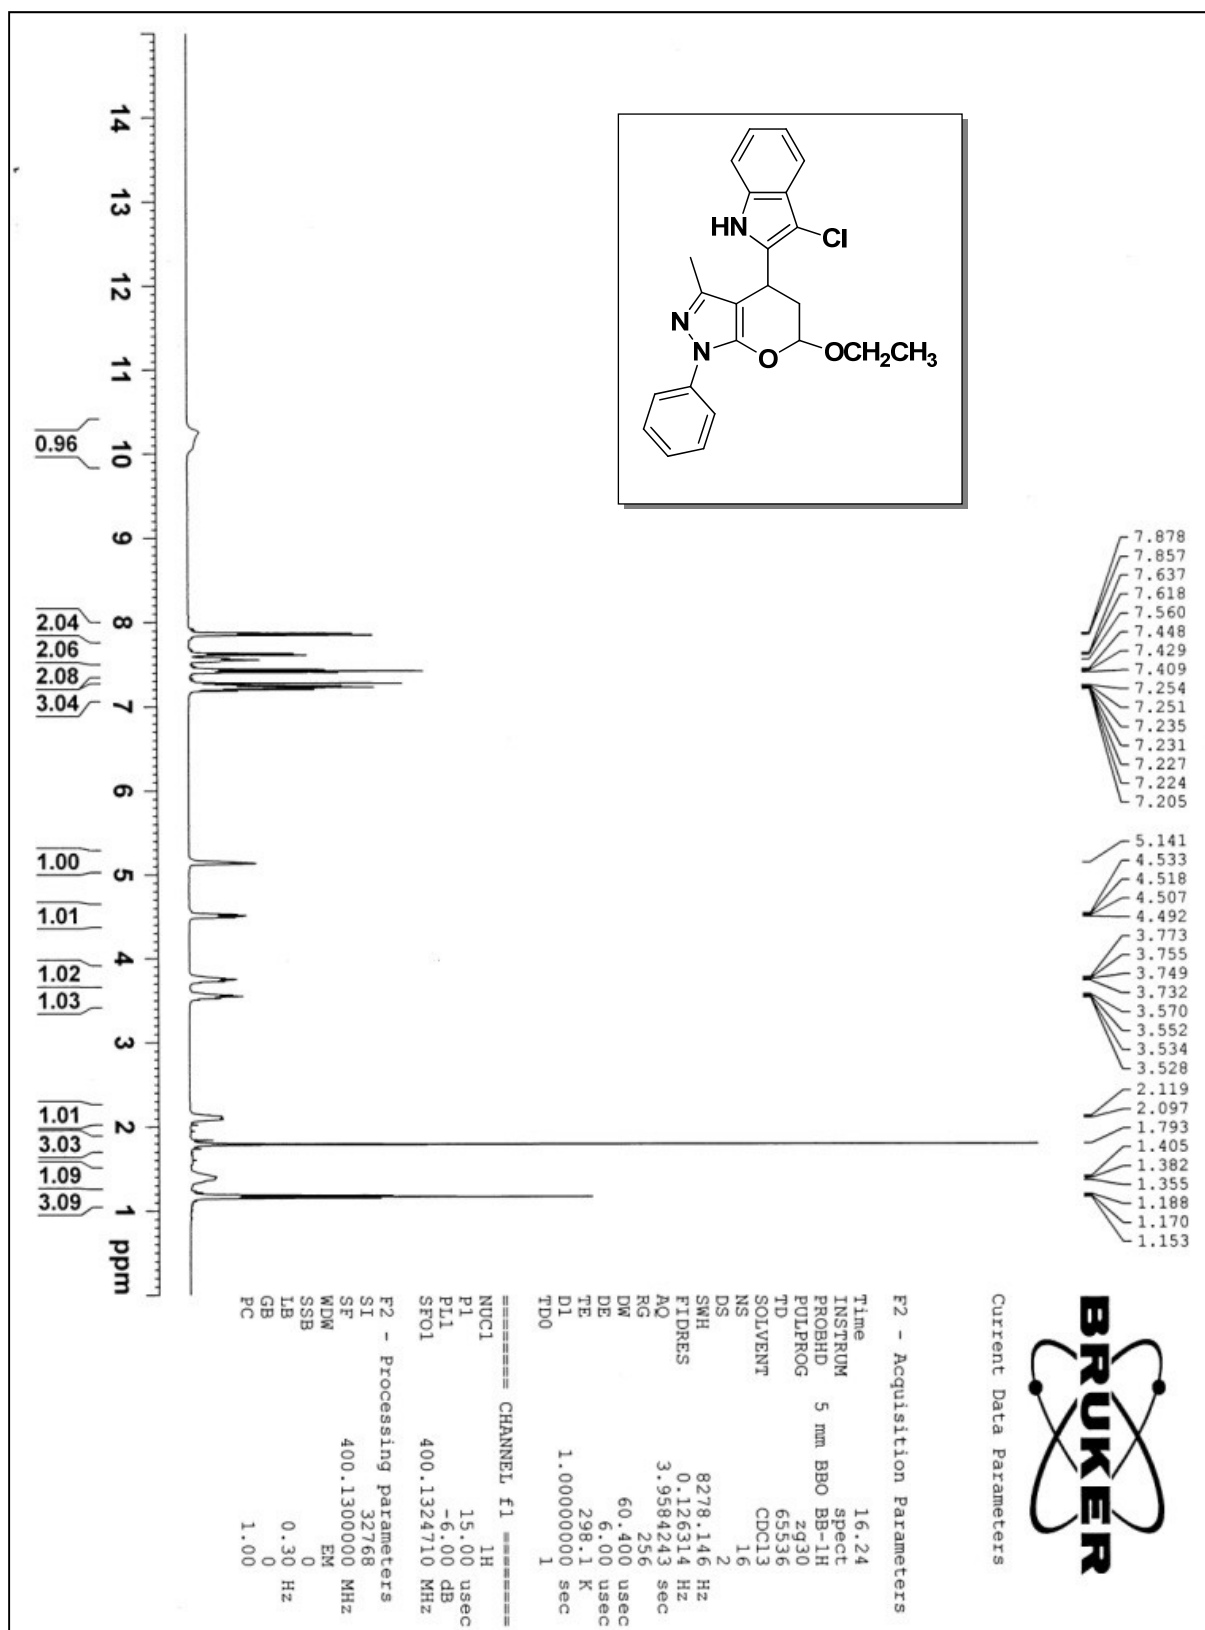

2D NOE for 7a

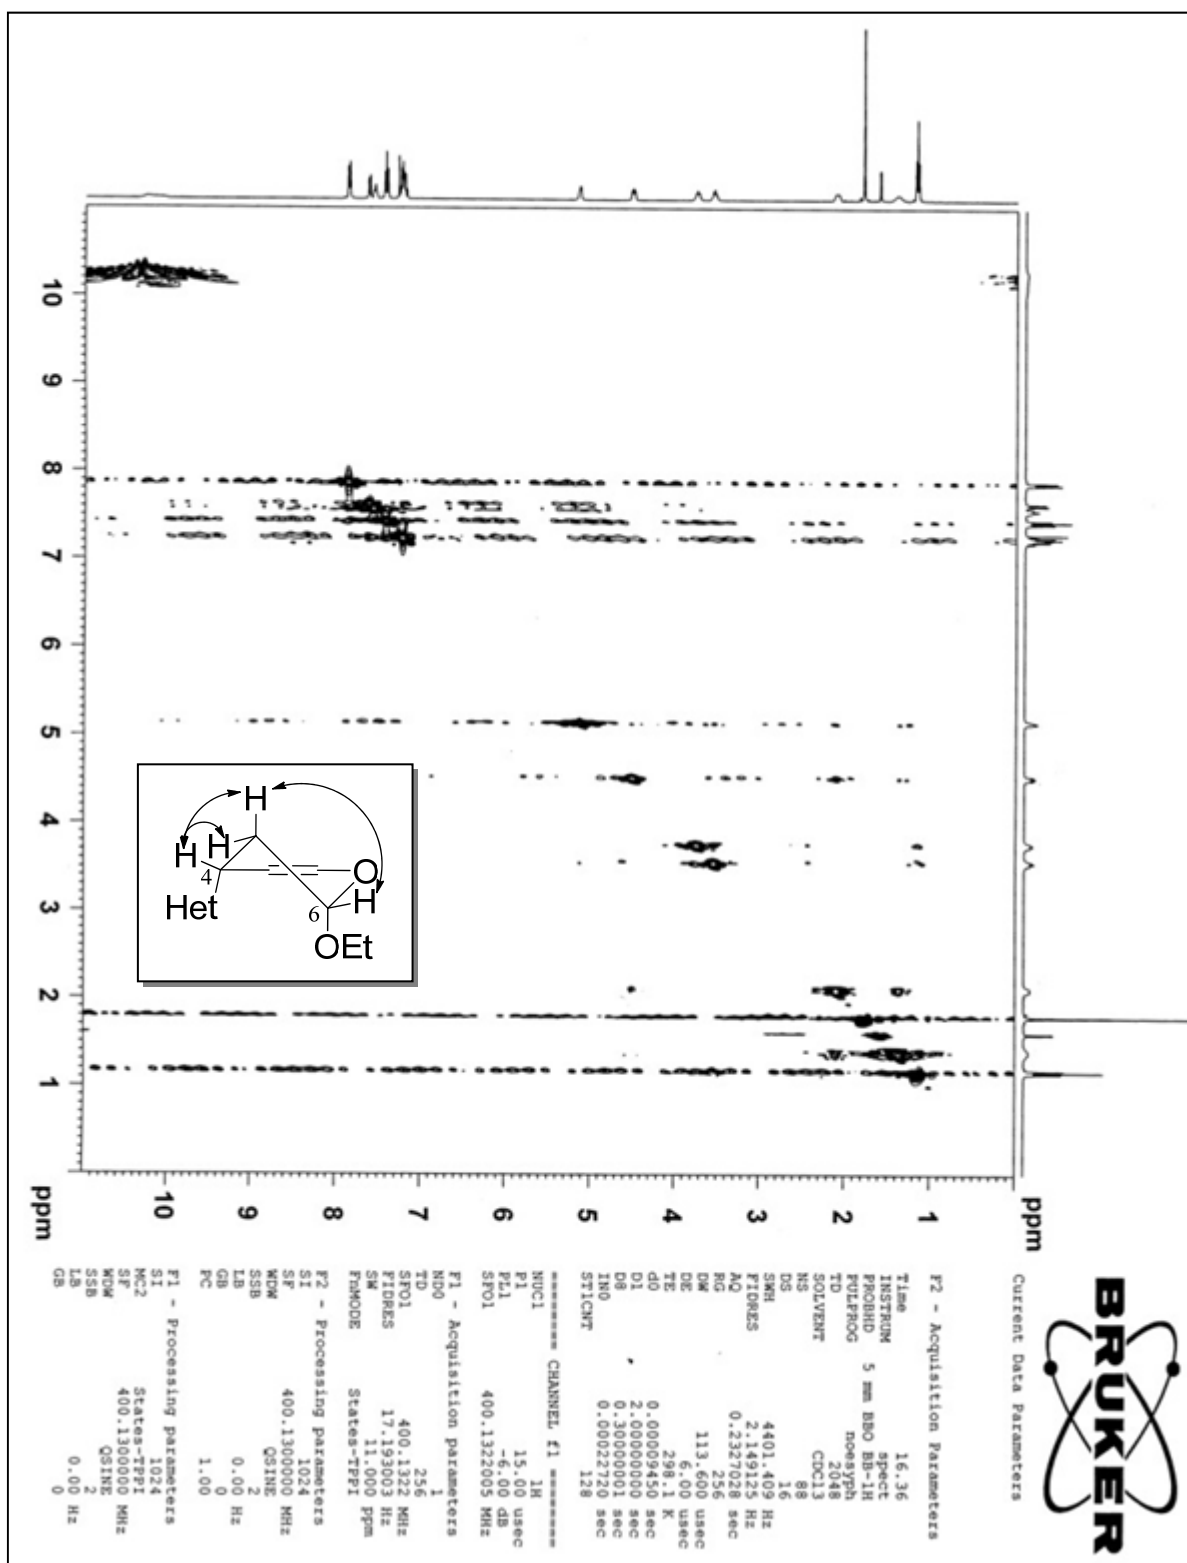

$^1\text{H-NMR}/7\text{b}/\text{CDCl}_3$

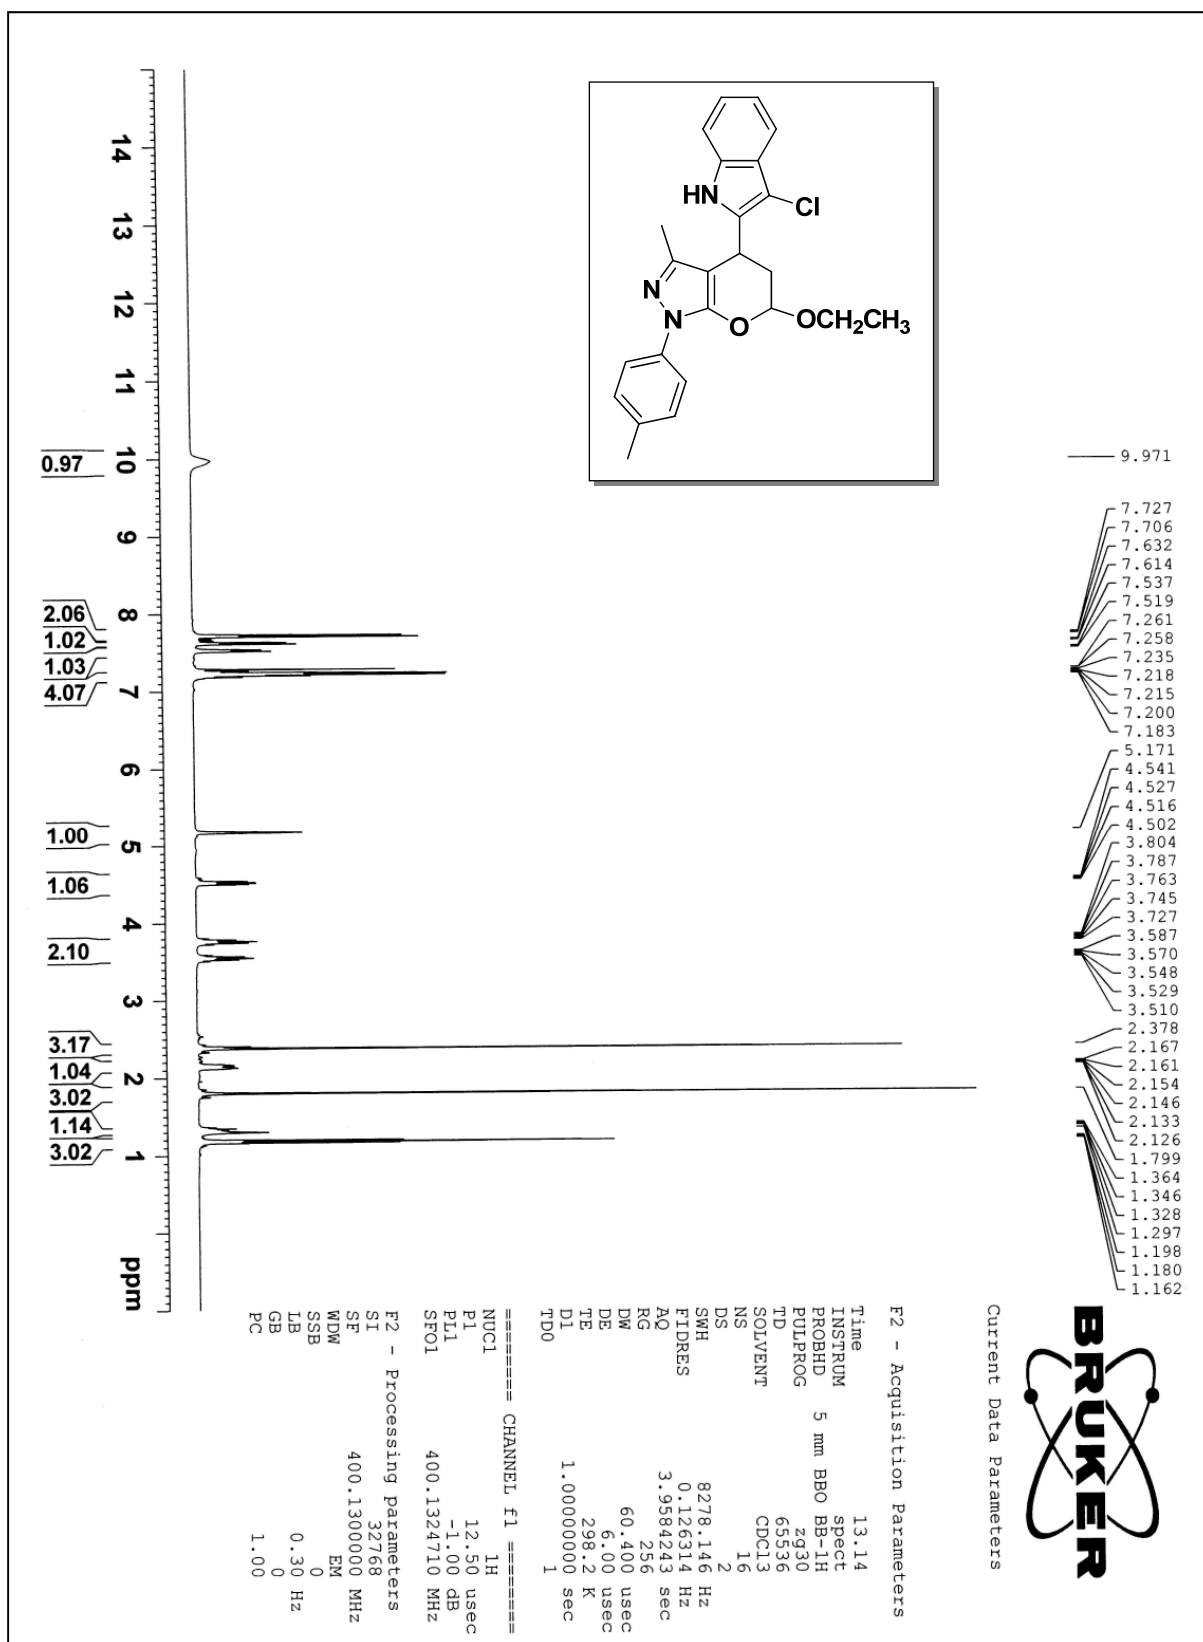

<sup>13</sup>C-NMR (DEPT-135)/ **7b**/ CDCl<sub>3</sub>

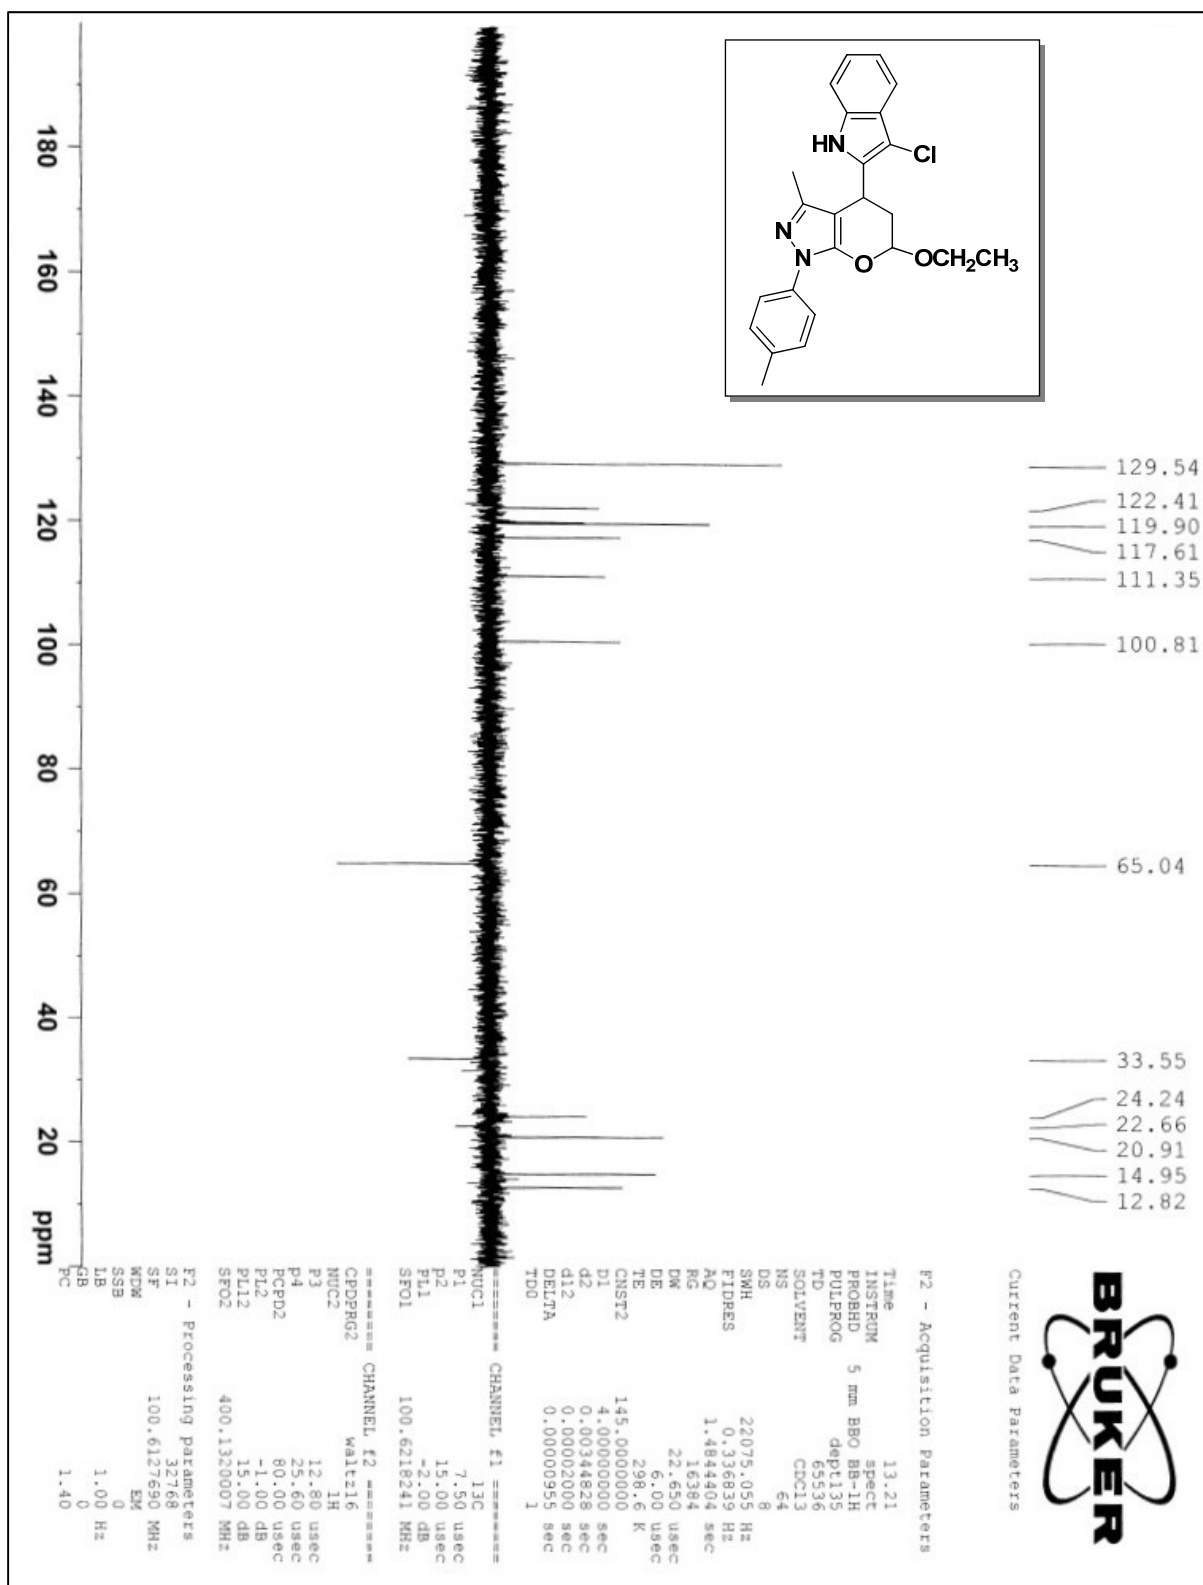

<sup>13</sup>C-NMR/7b/ CDCl<sub>3</sub>

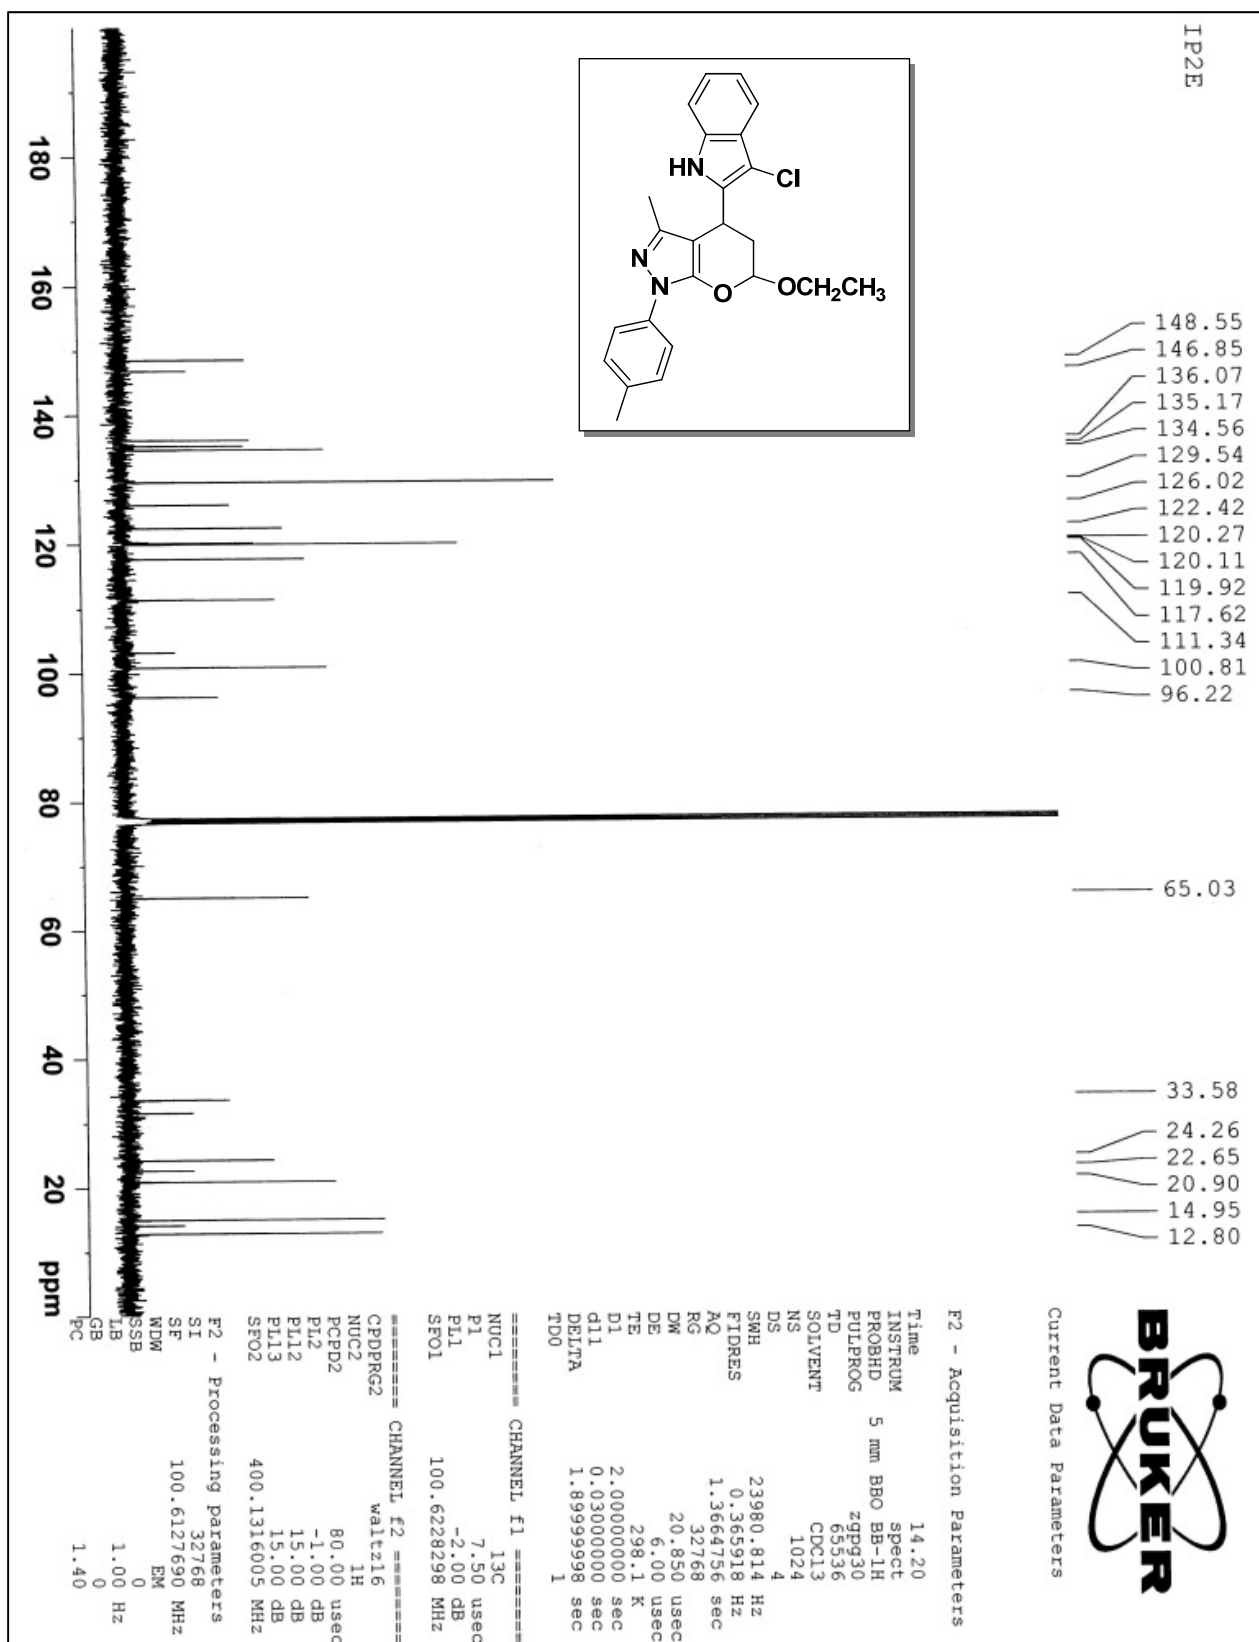



IR/7b/ KBr

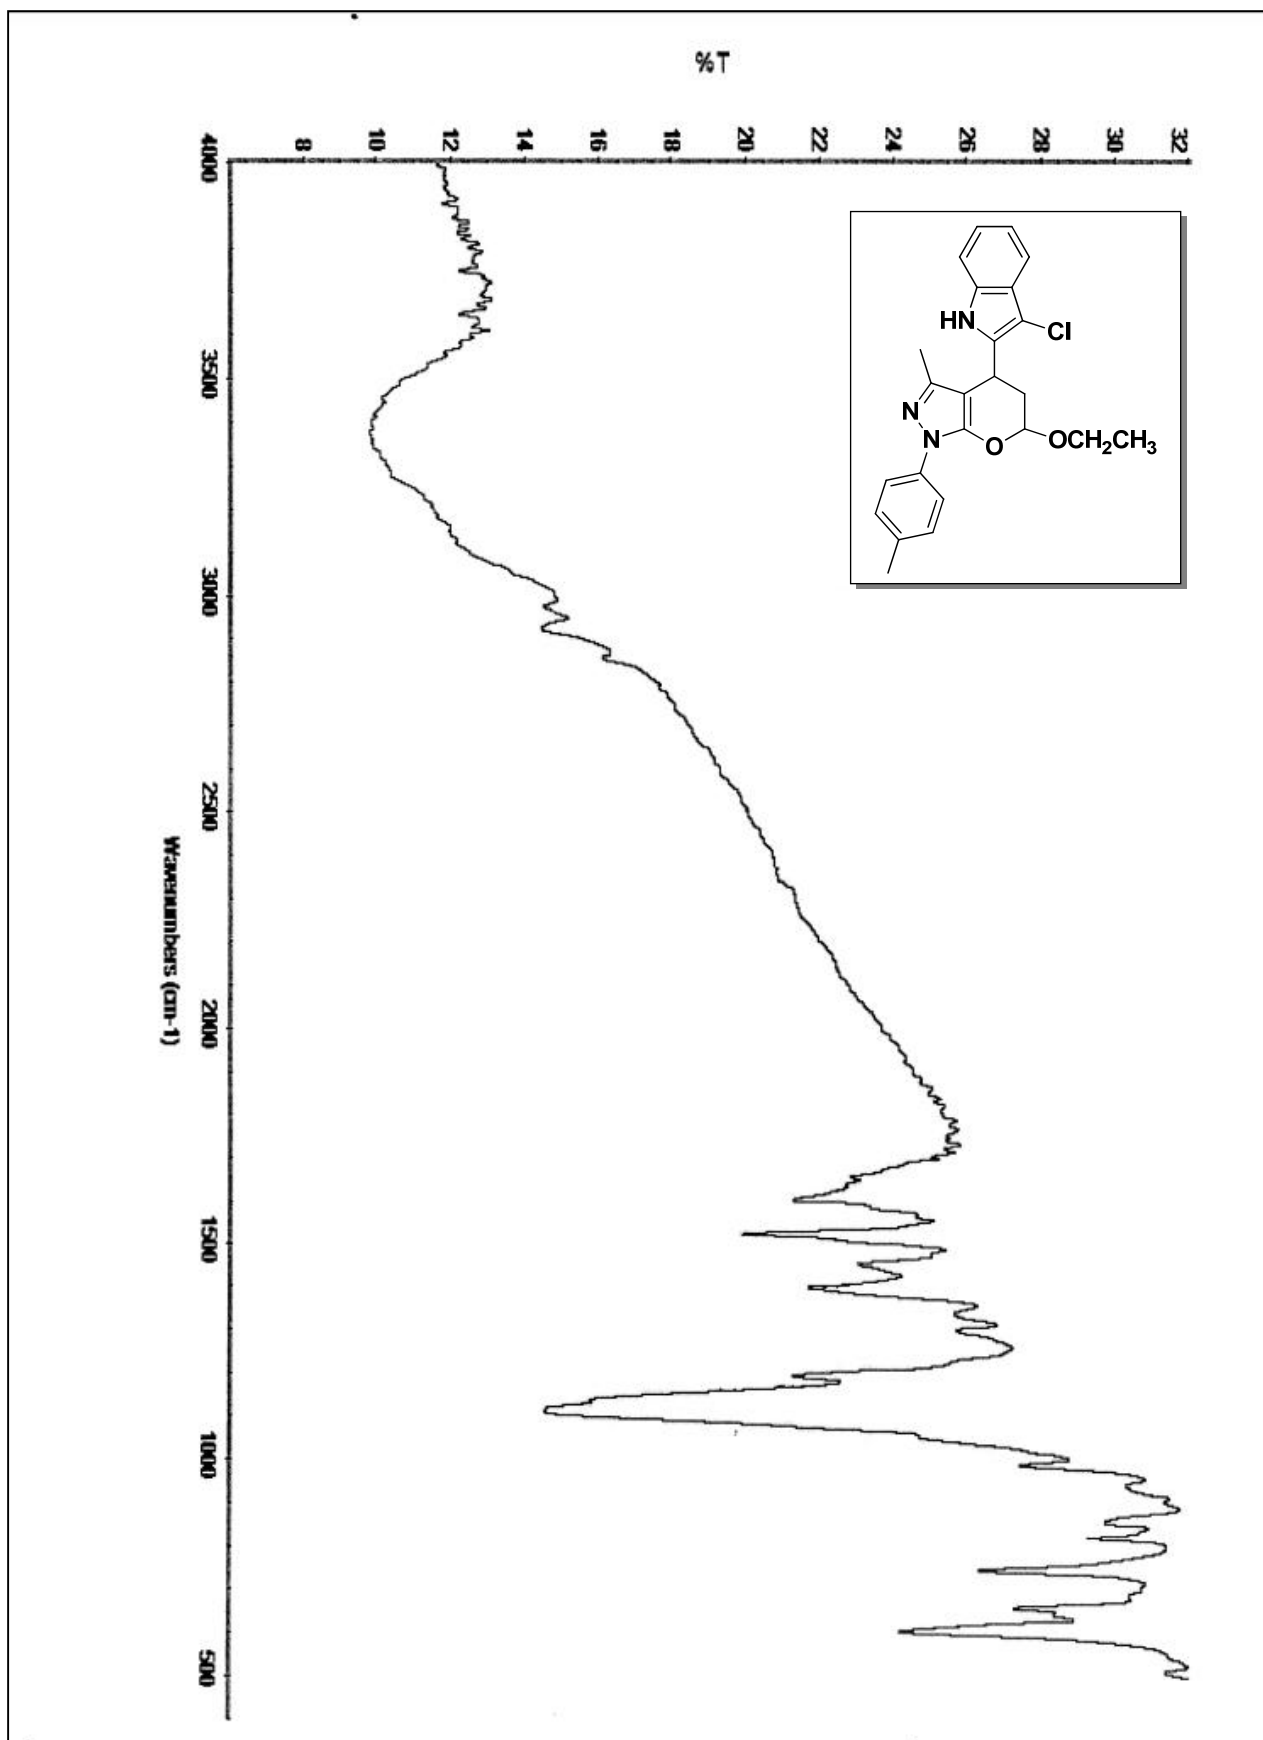

<sup>1</sup>H-NMR/7c/CDCl<sub>3</sub>

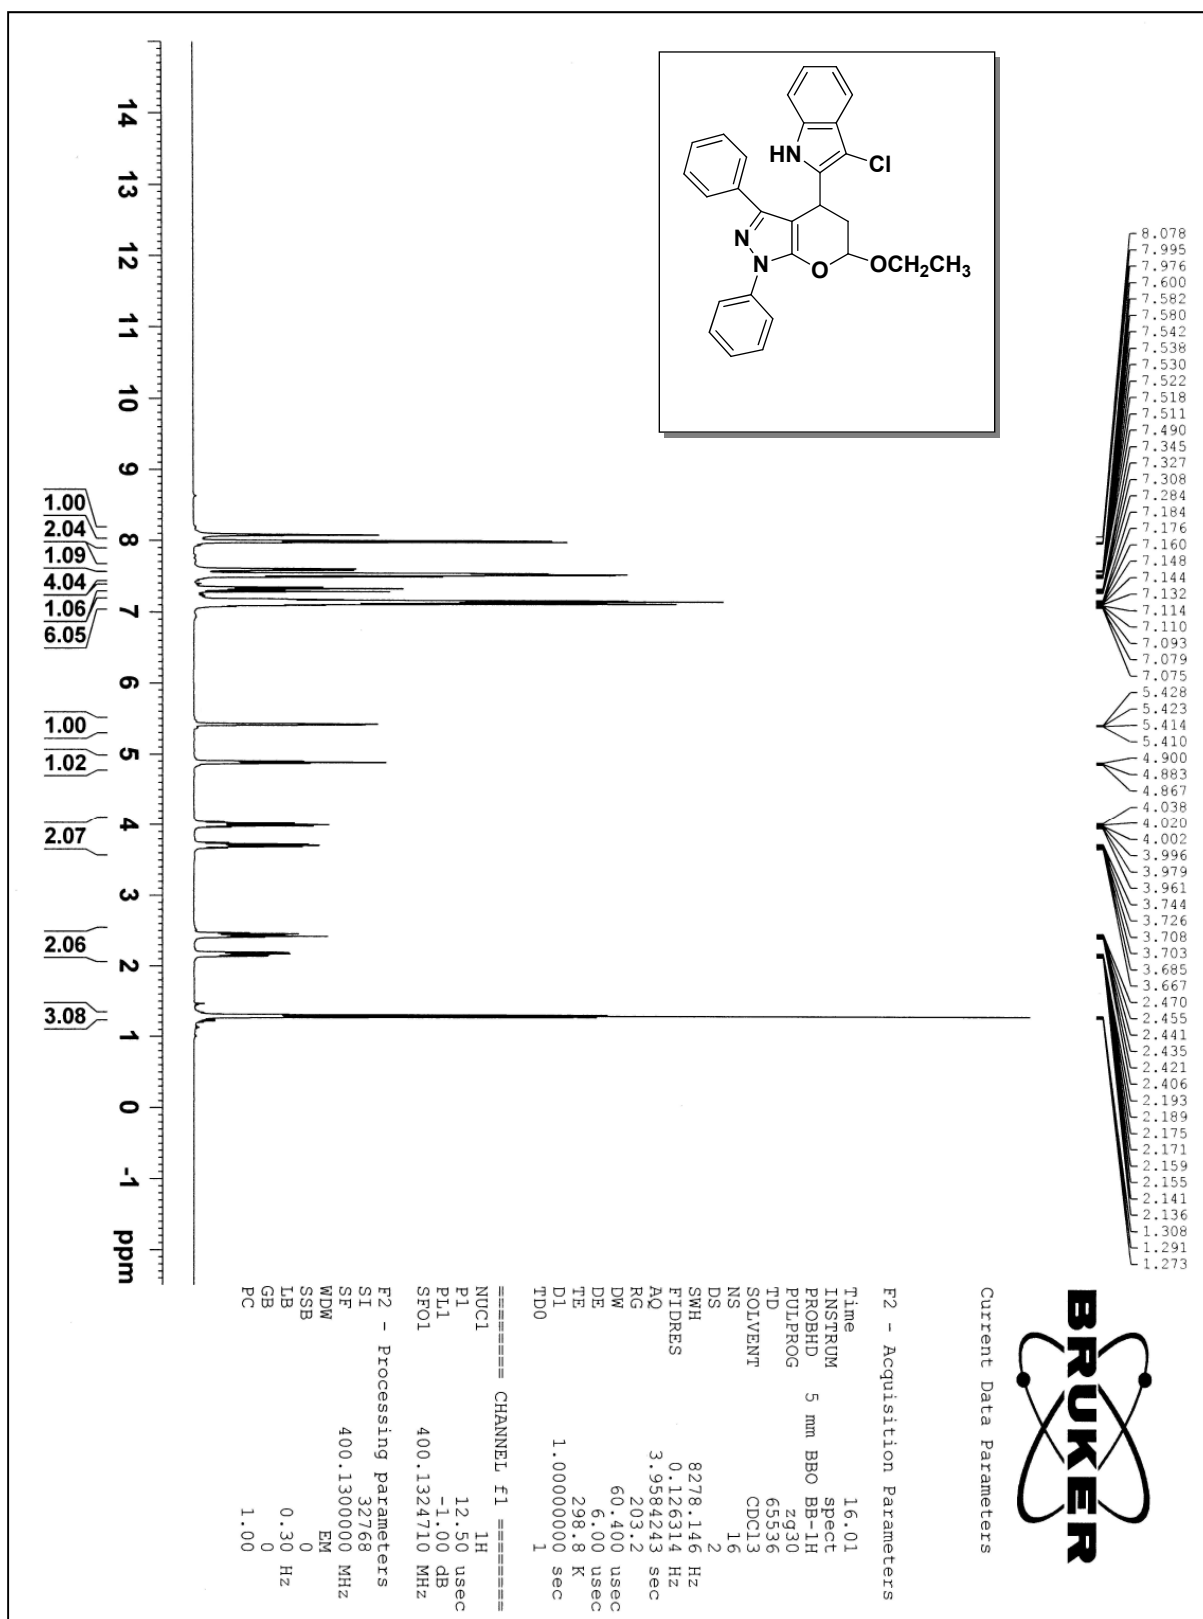

<sup>13</sup>C-NMR (DEPT-135)/ **7c**/ CDCl<sub>3</sub>

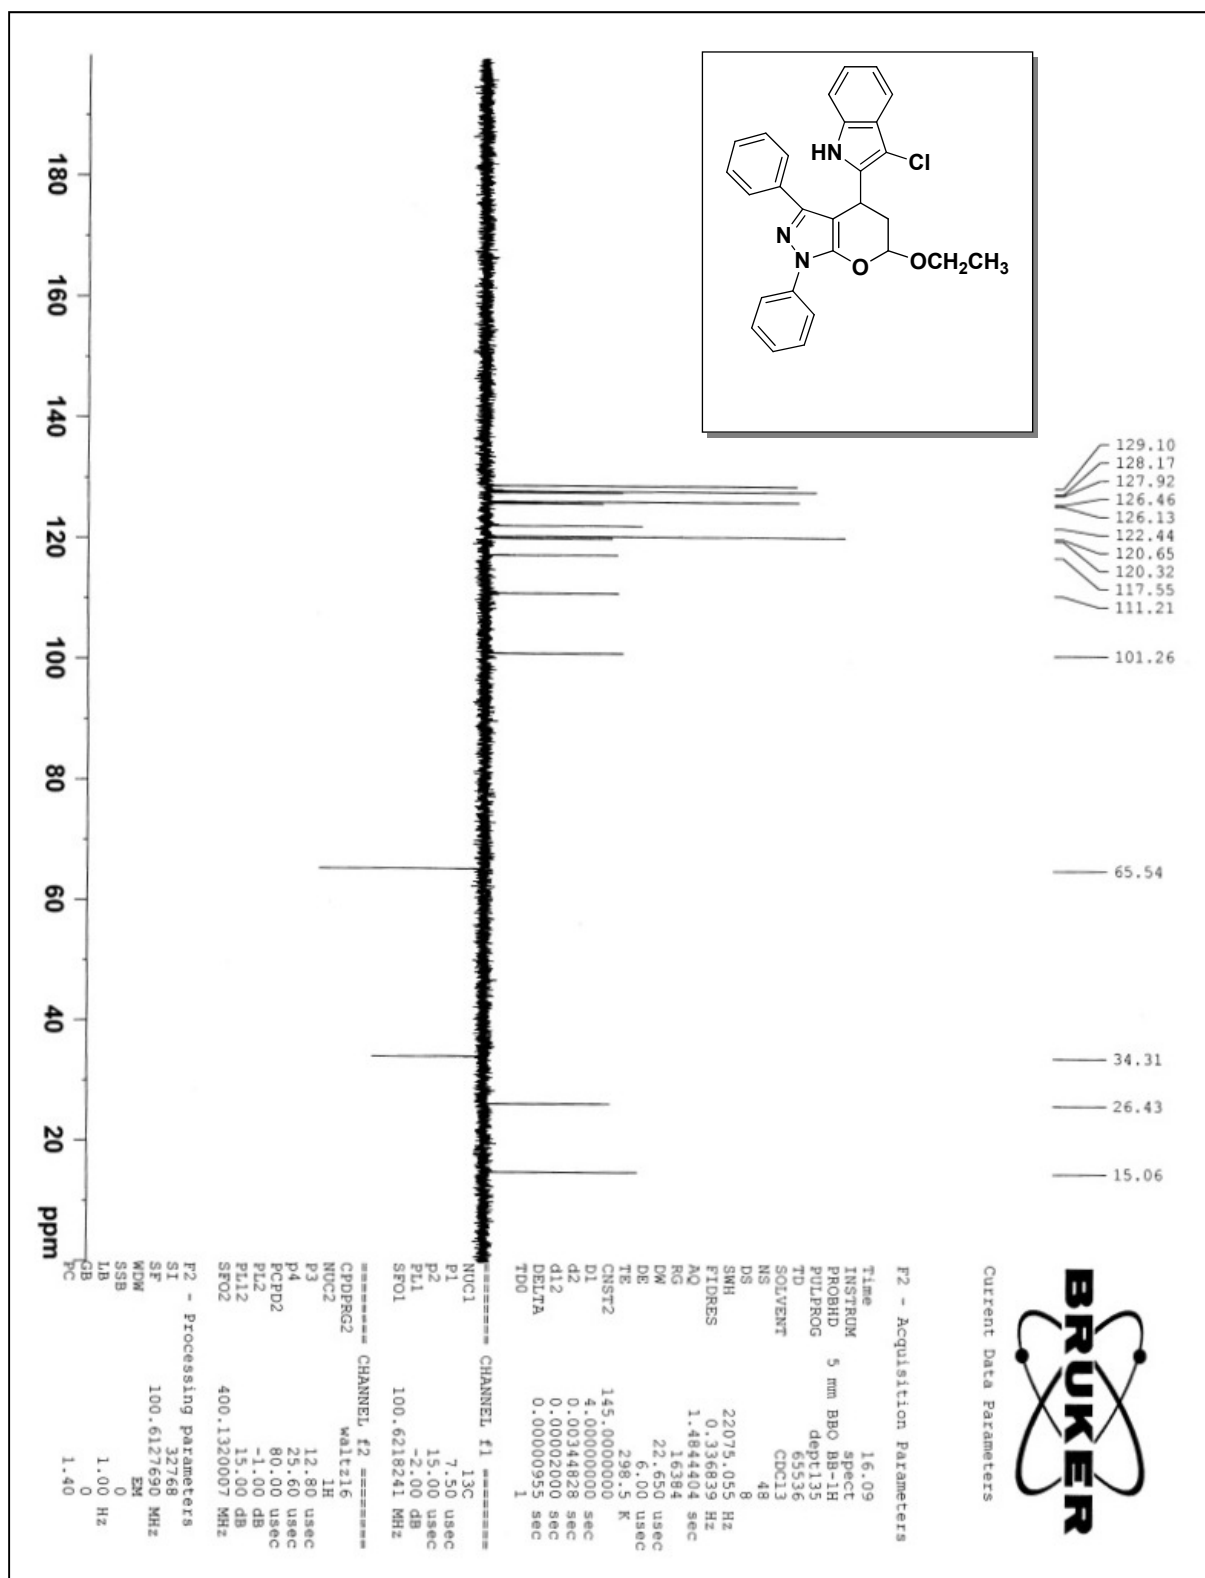

$^{13}\text{C-NMR}/7\text{c}/\text{CDCl}_3$

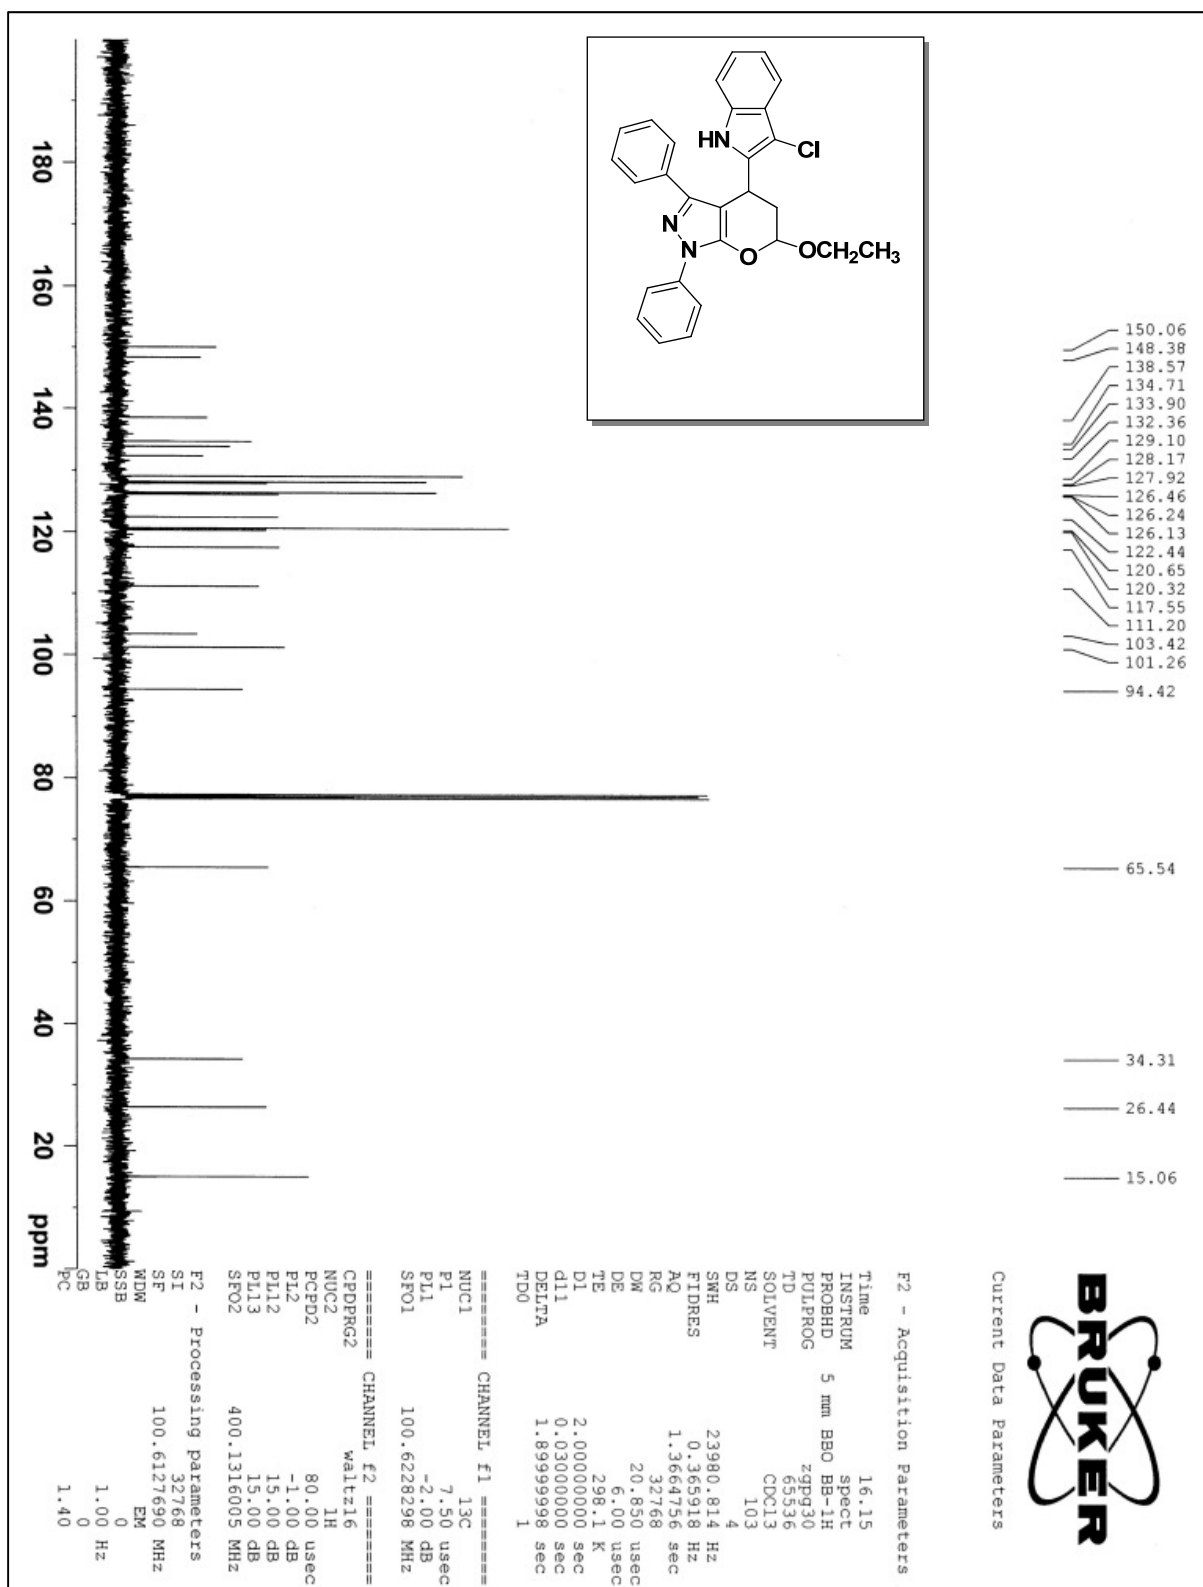

### MS/7c

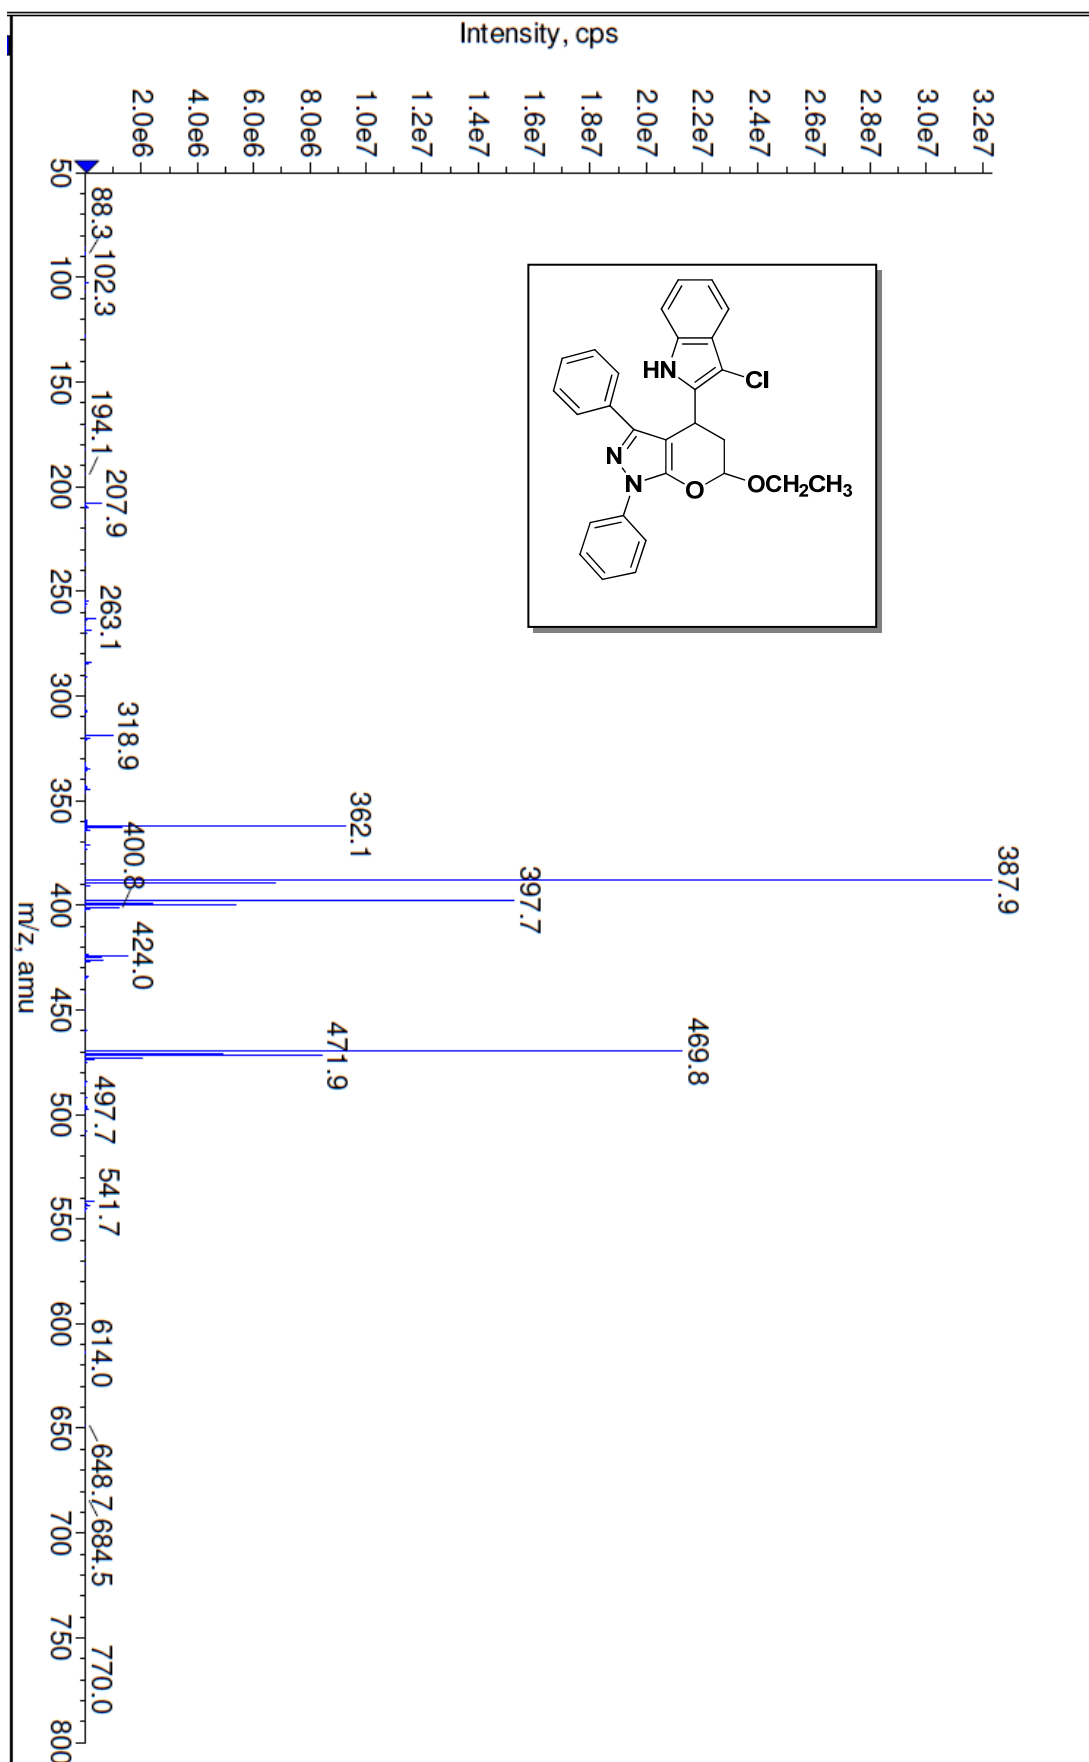

IR/7c/ KBr

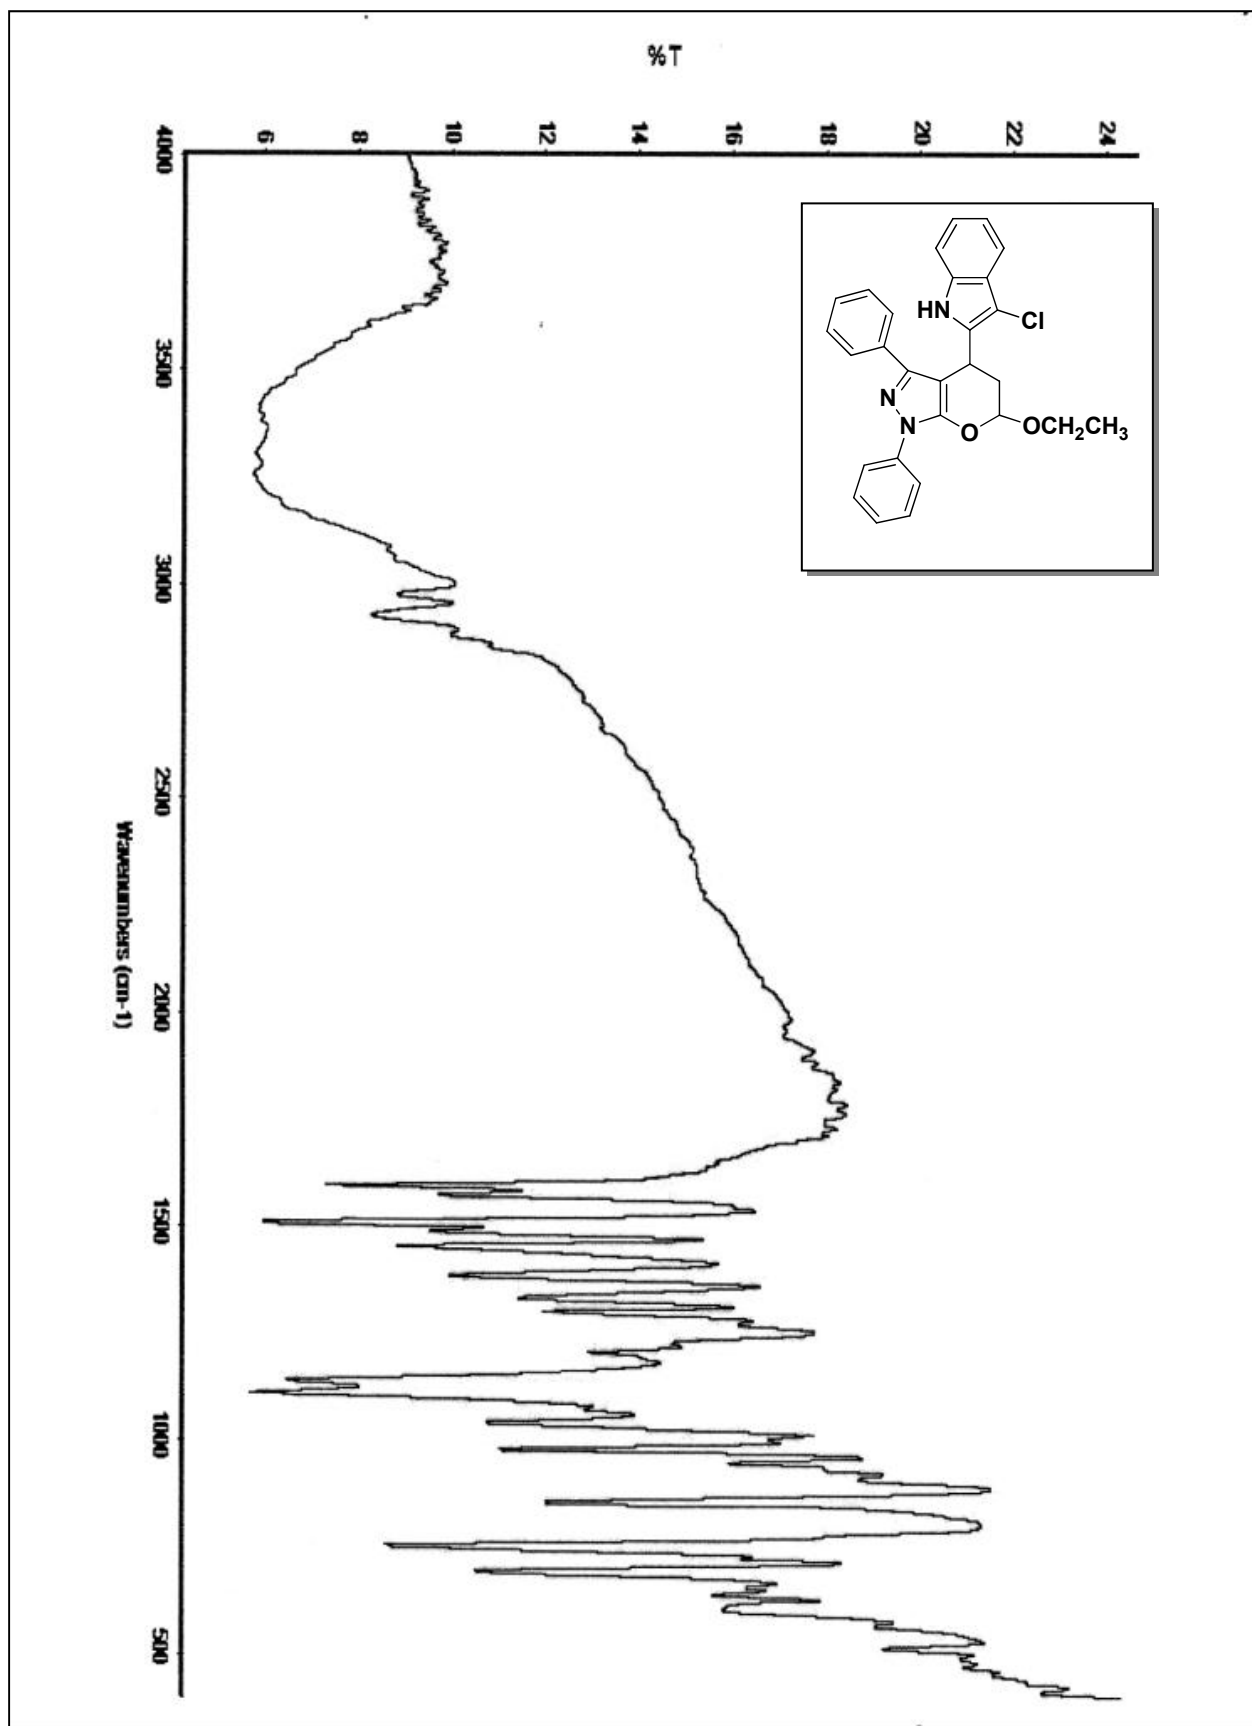

$^1\text{H-NMR}/\mathbf{8a}/\text{CDCl}_3$

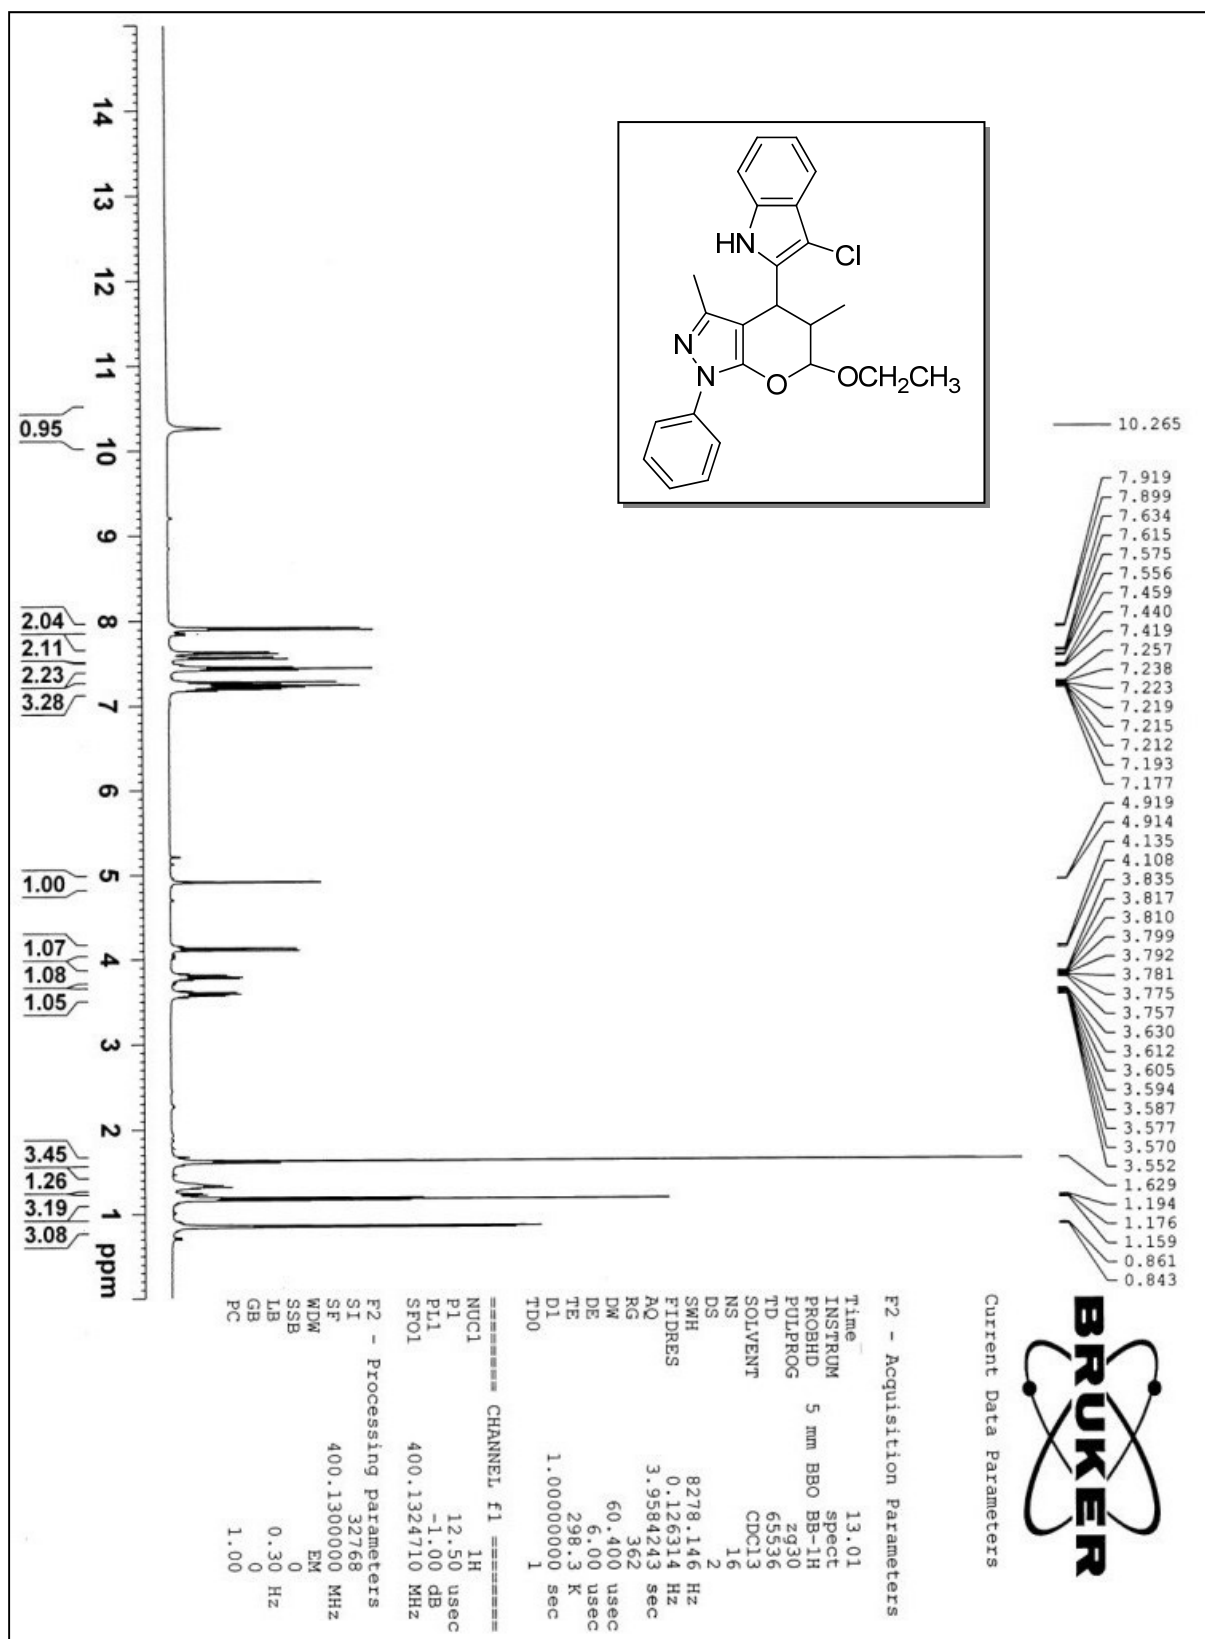

<sup>13</sup>C-NMR (APT)/ **8a**/ CDCl<sub>3</sub>

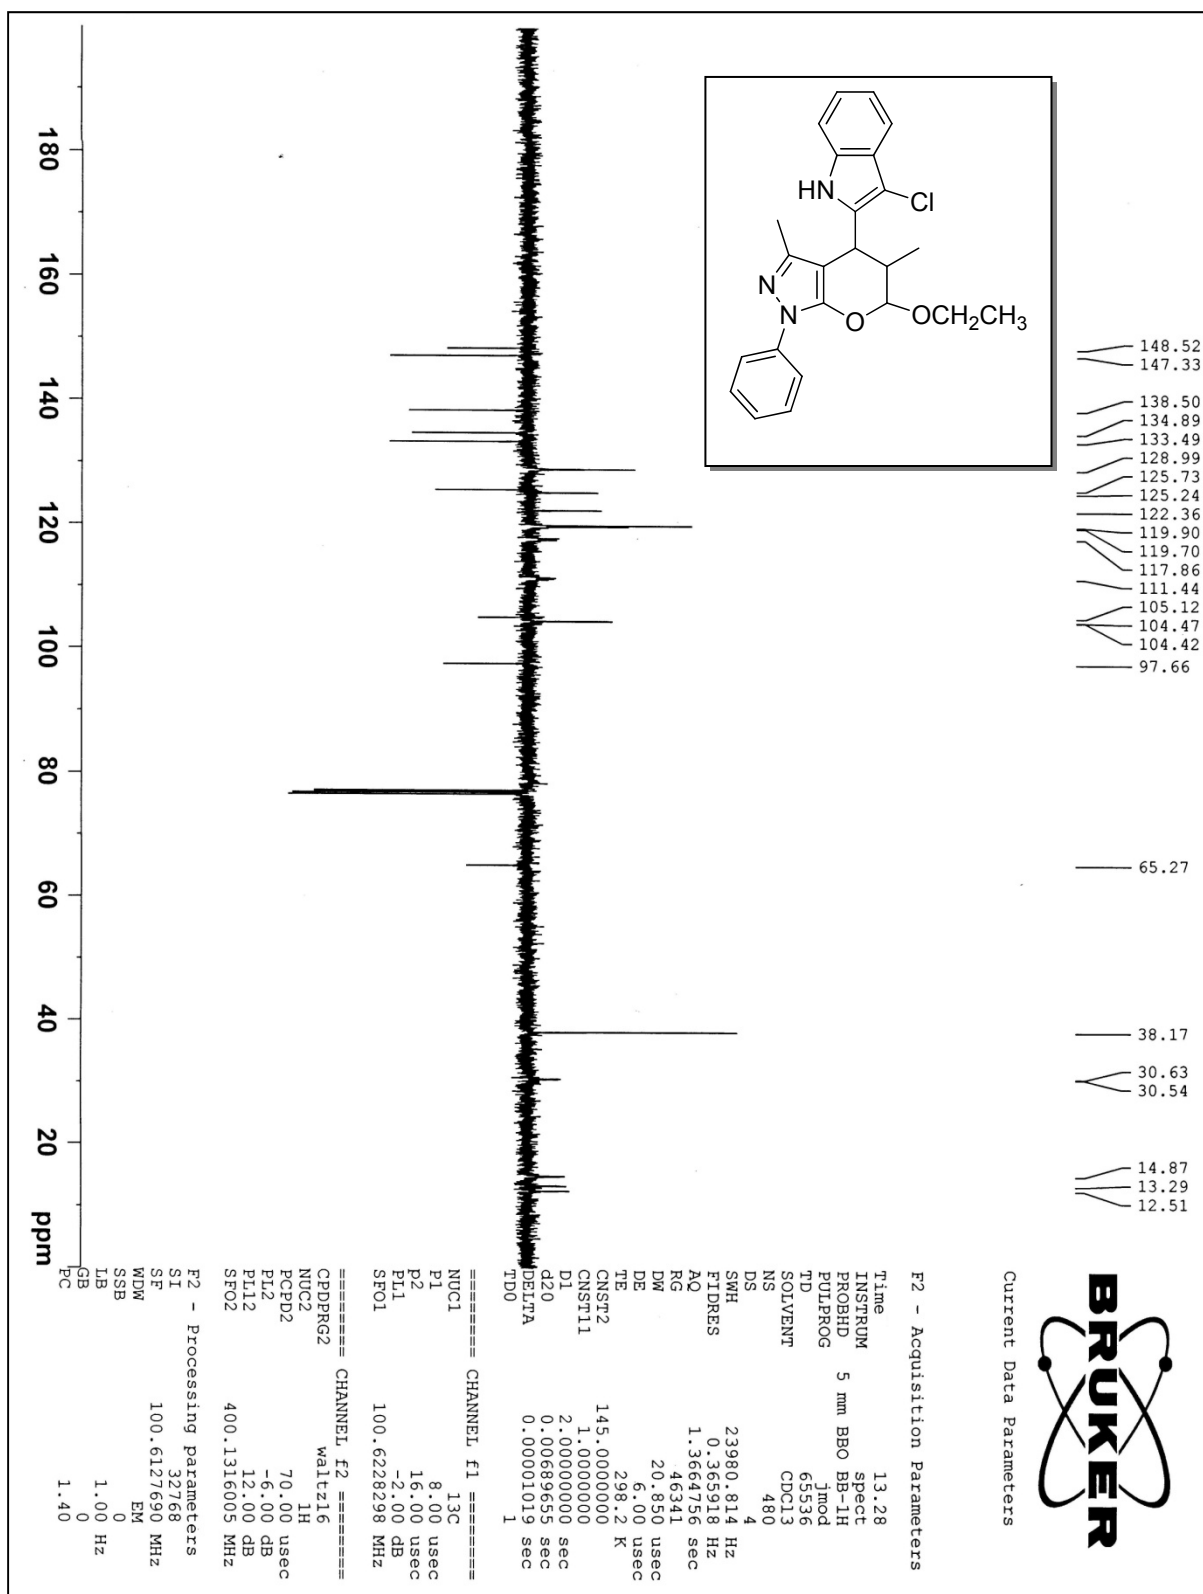



IR/8a/KBr

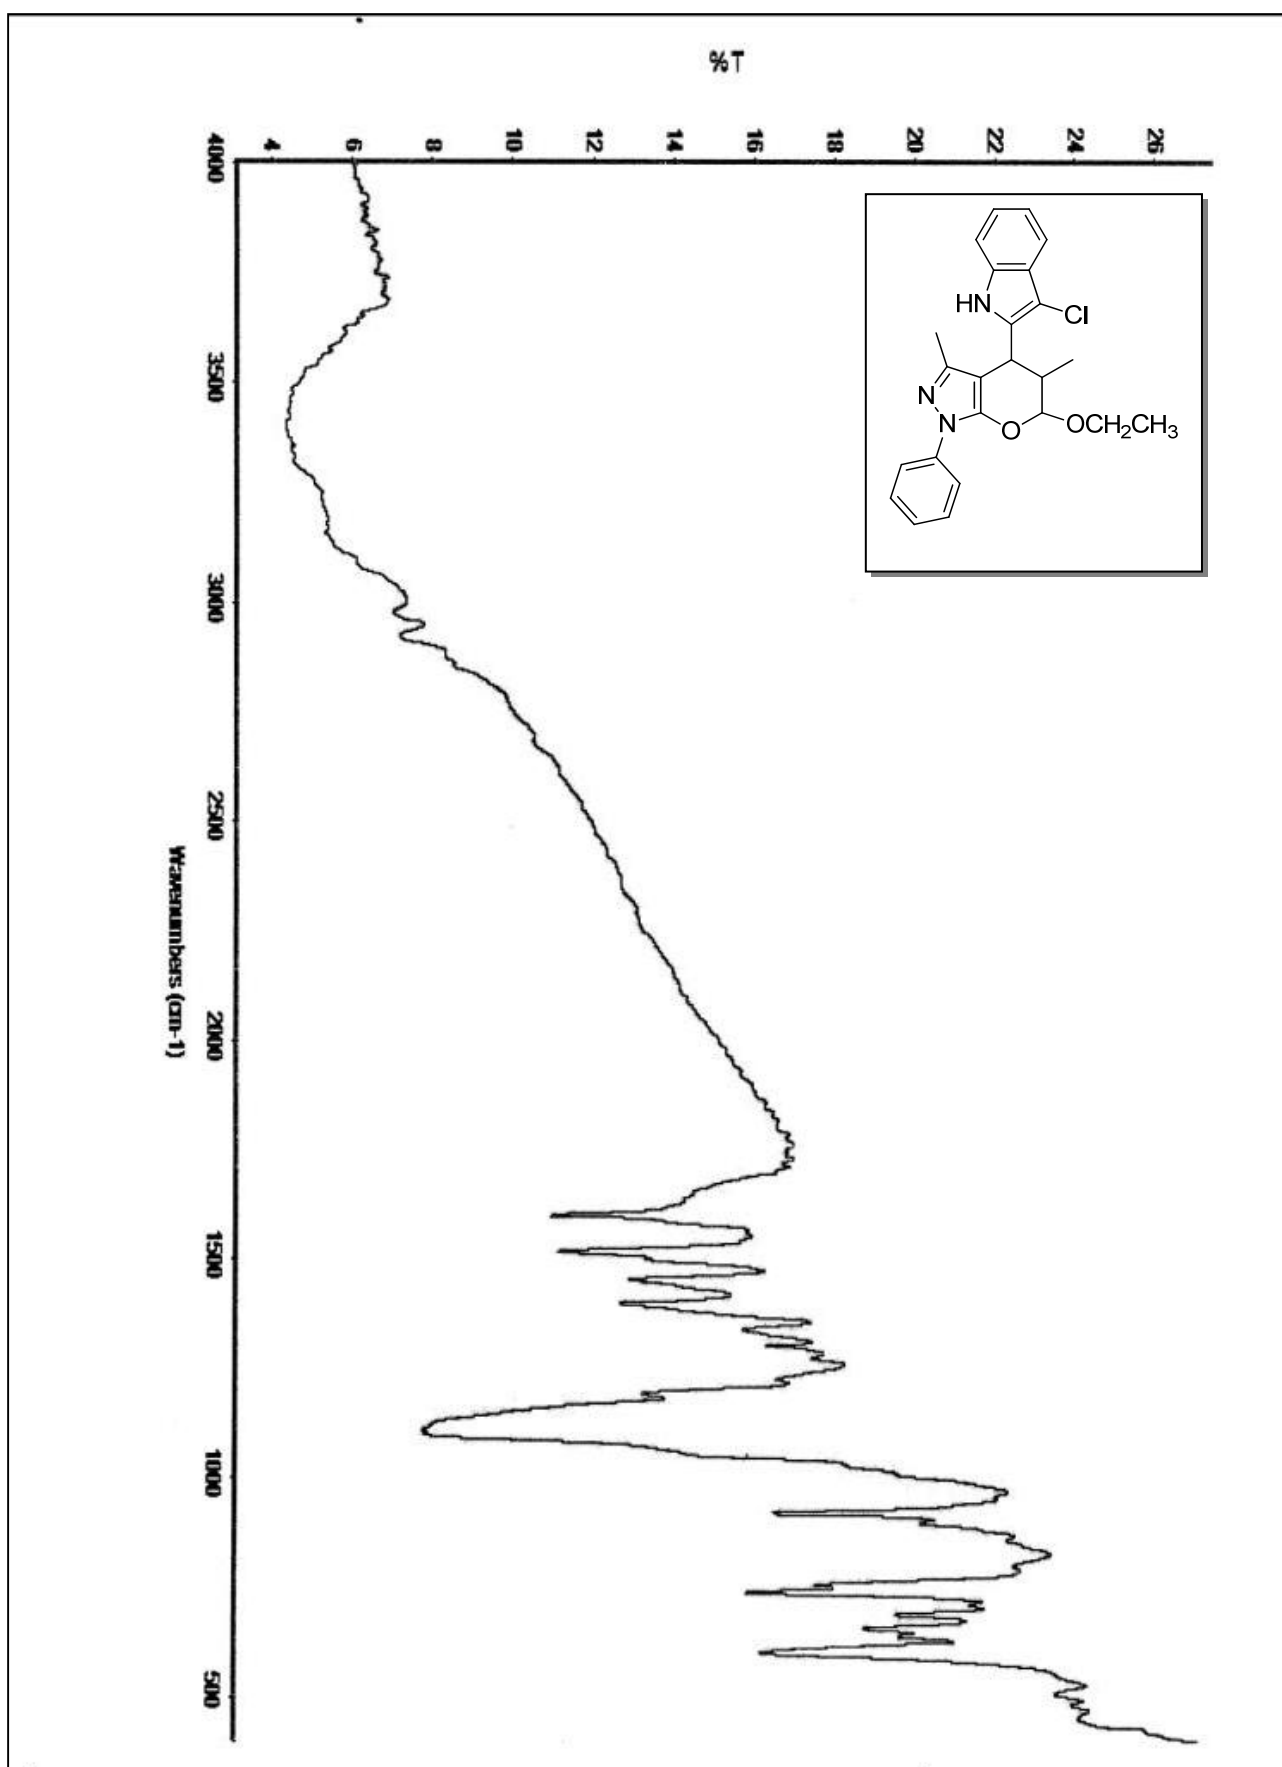

$^1\text{H-NMR}/\mathbf{9a}/\text{CDCl}_3$

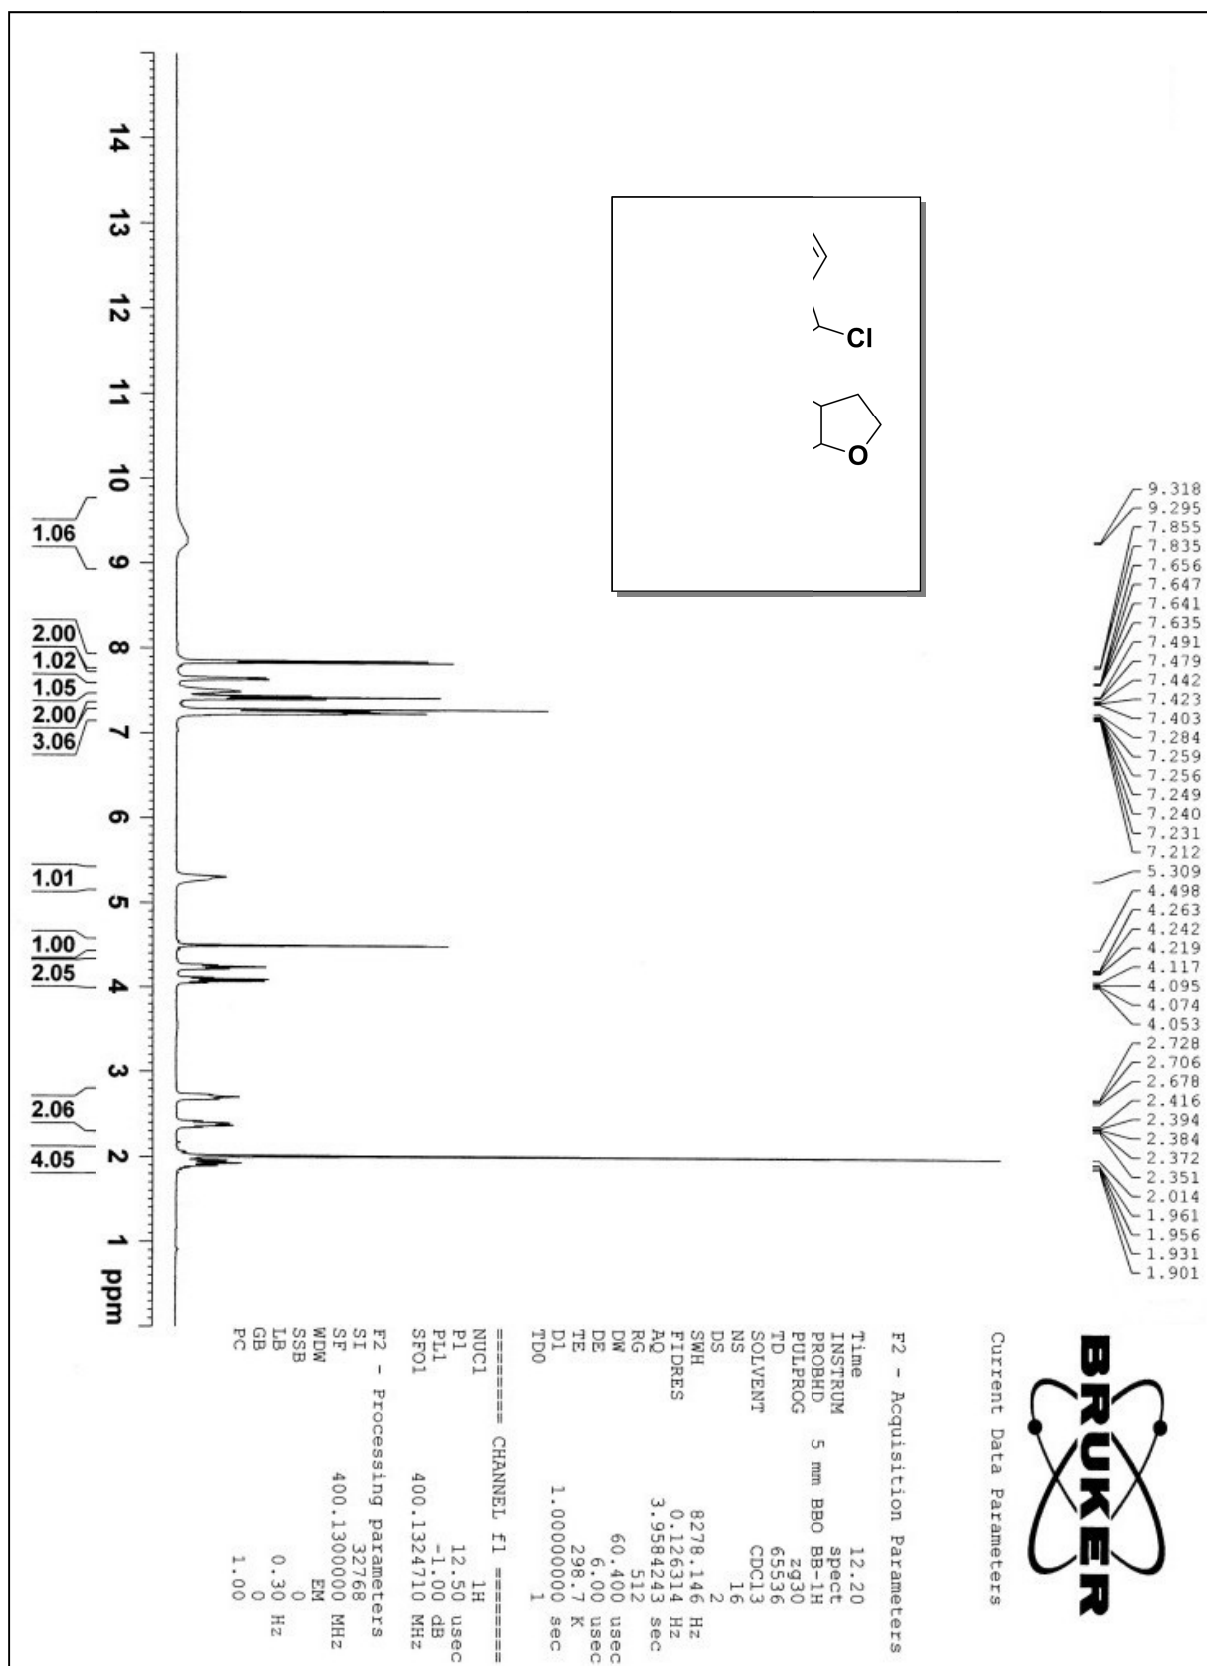

<sup>13</sup>C-NMR (DEPT-135)/ **9a**/ CDCl<sub>3</sub>

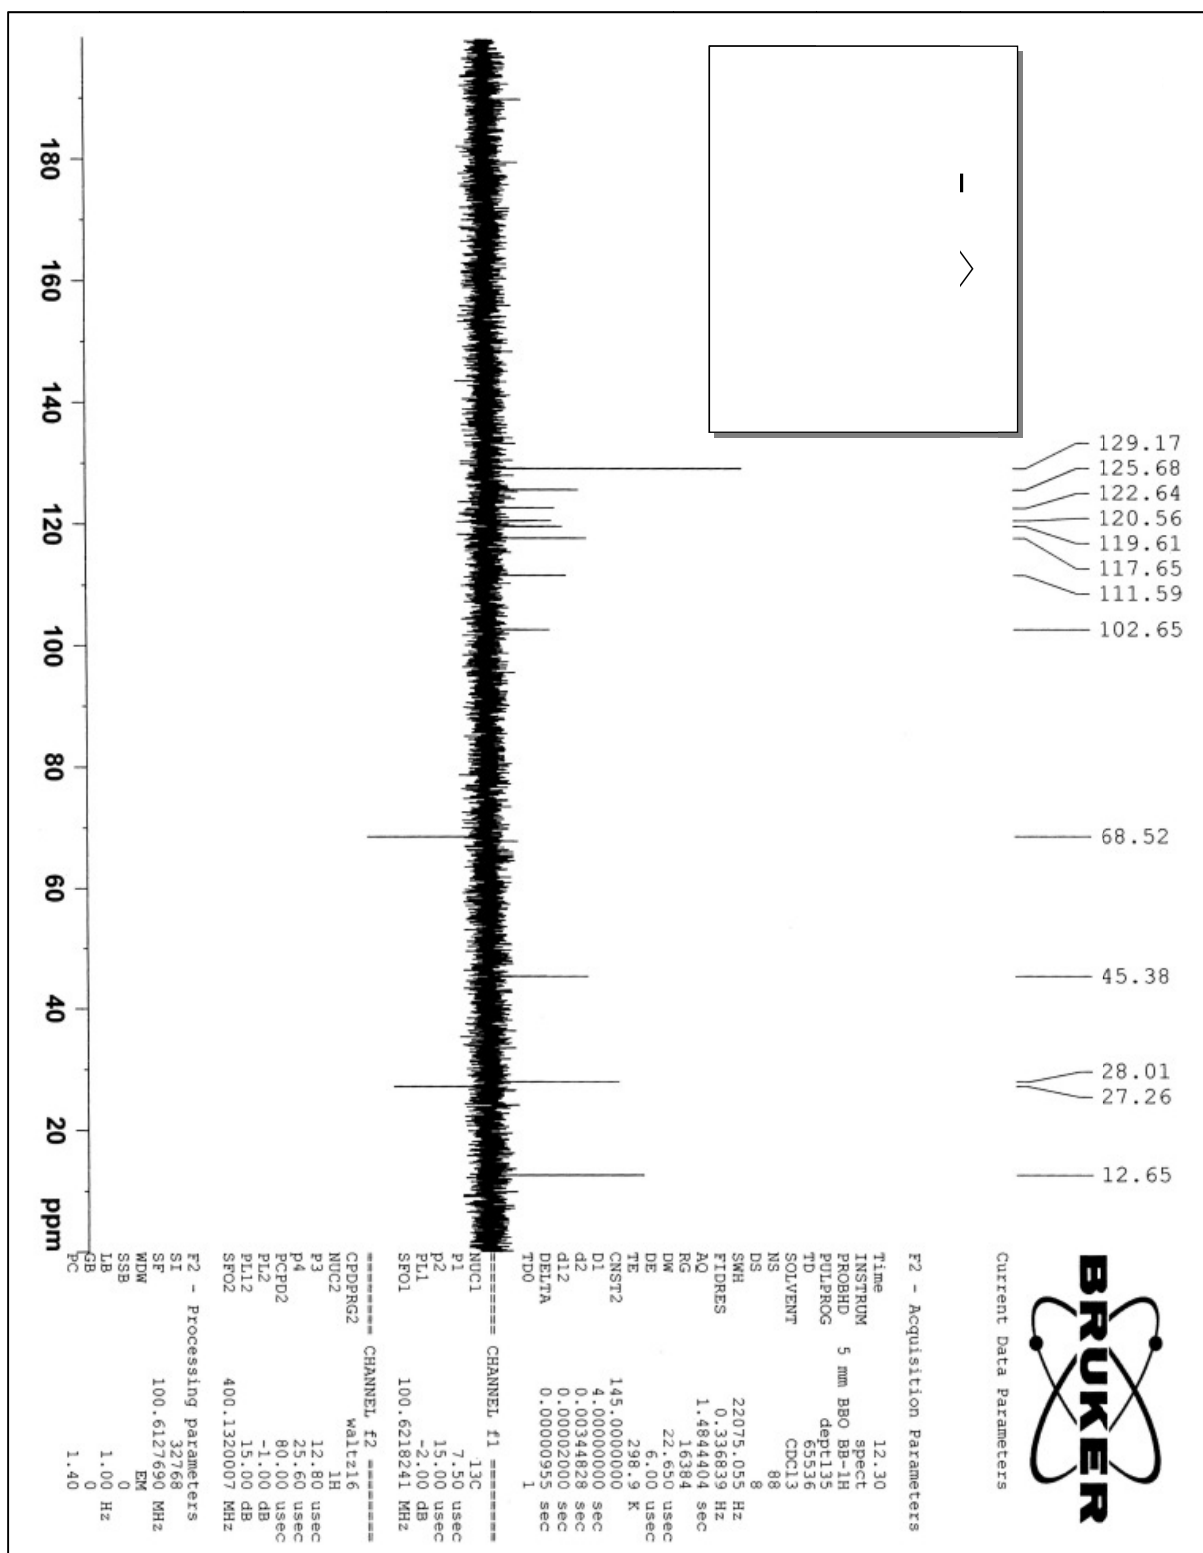

<sup>13</sup>C-NMR/9a/ CDCl<sub>3</sub>

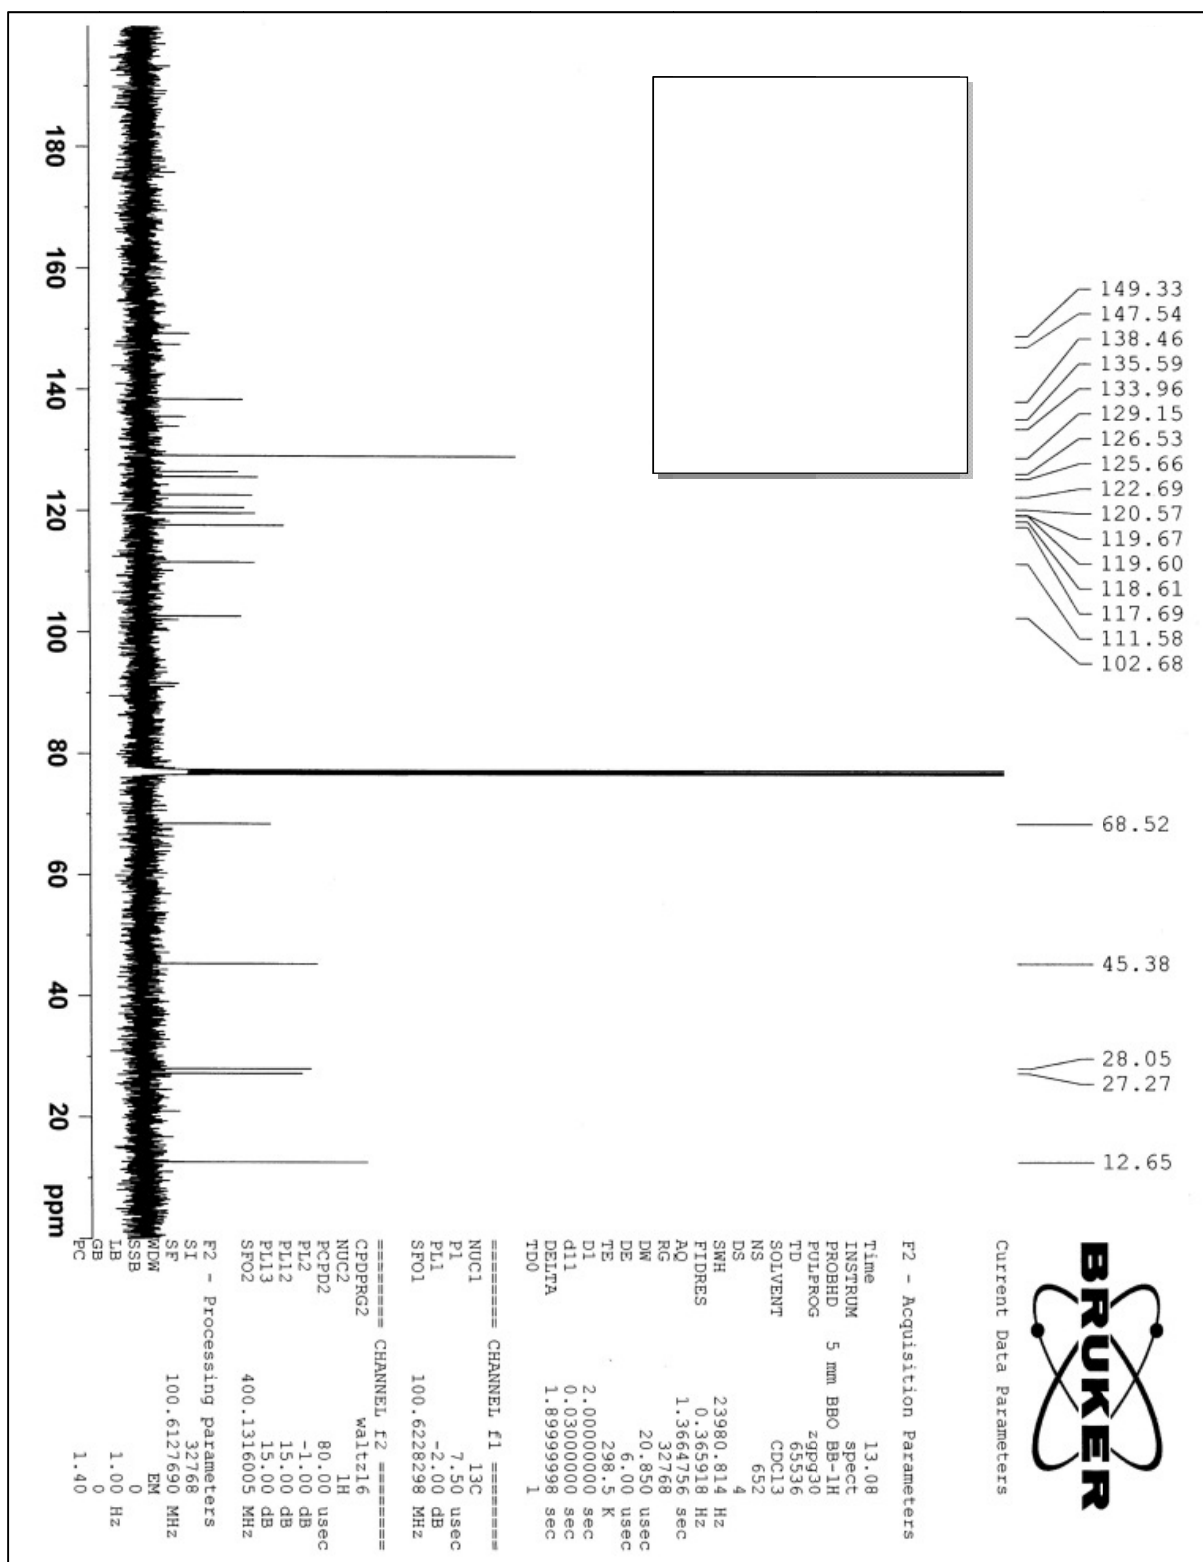

### MS/9a

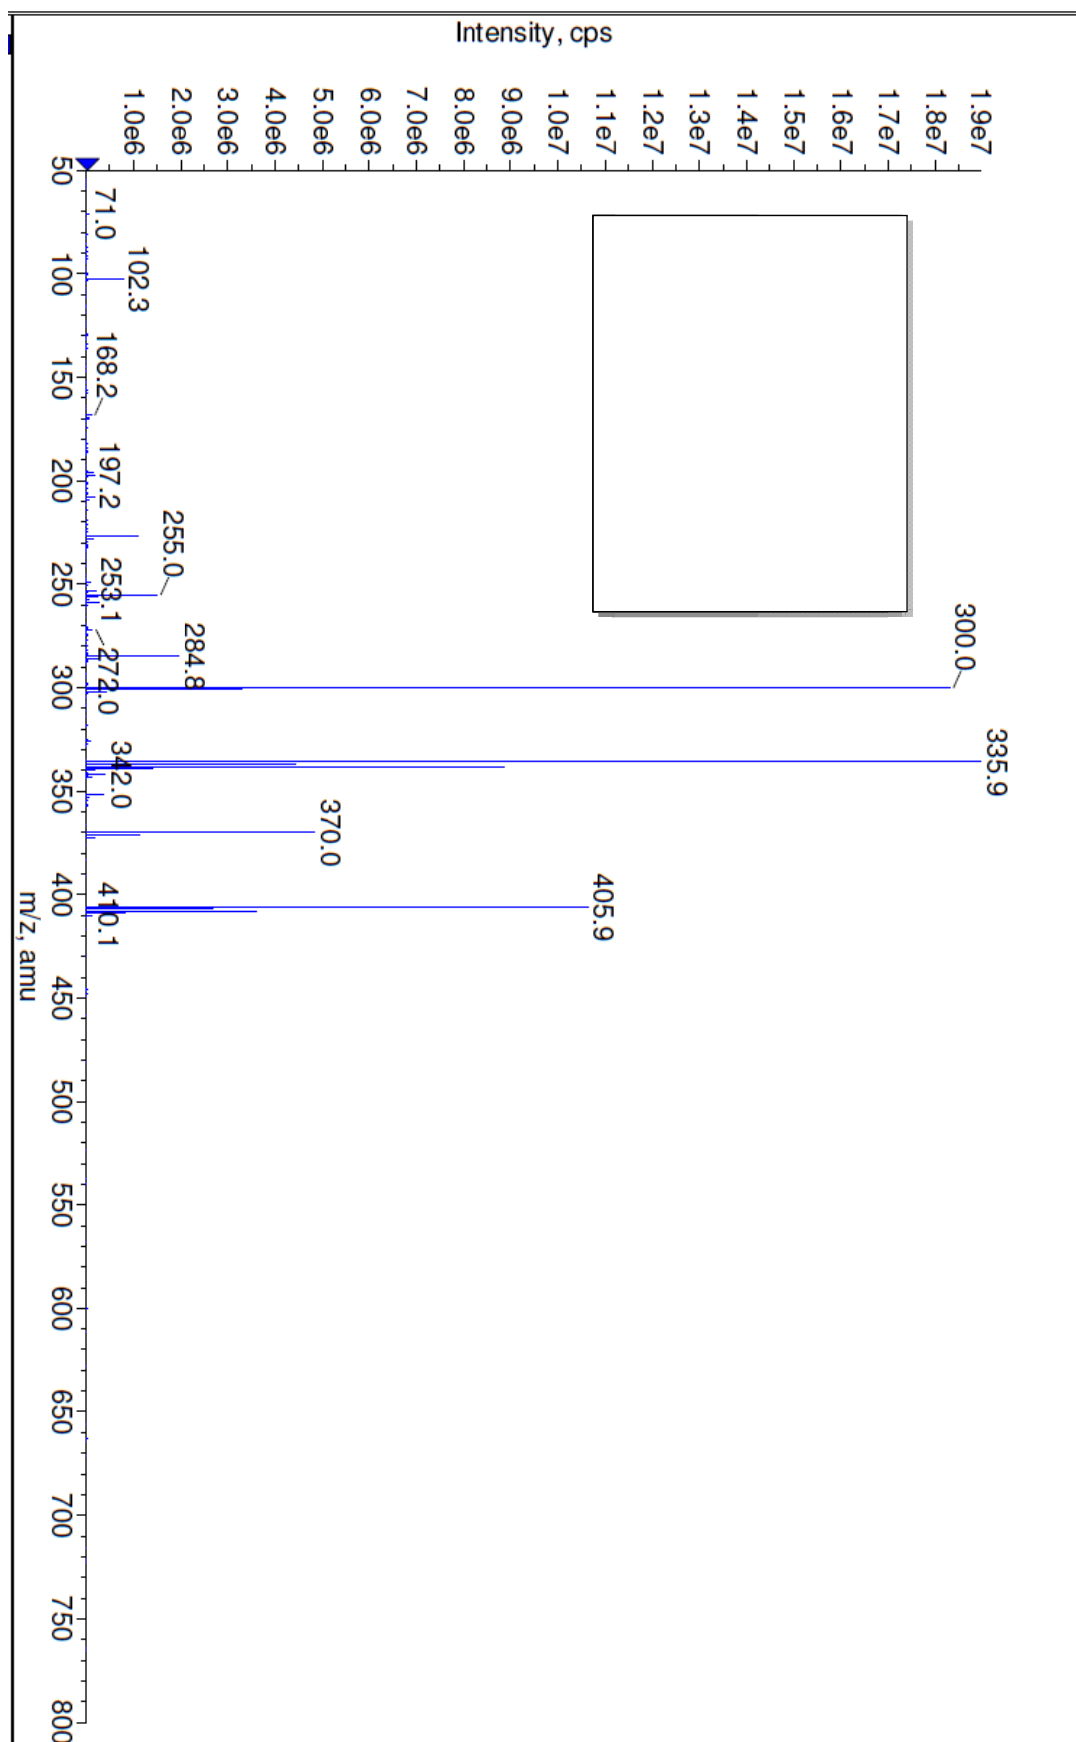

IR/9a/ KBr

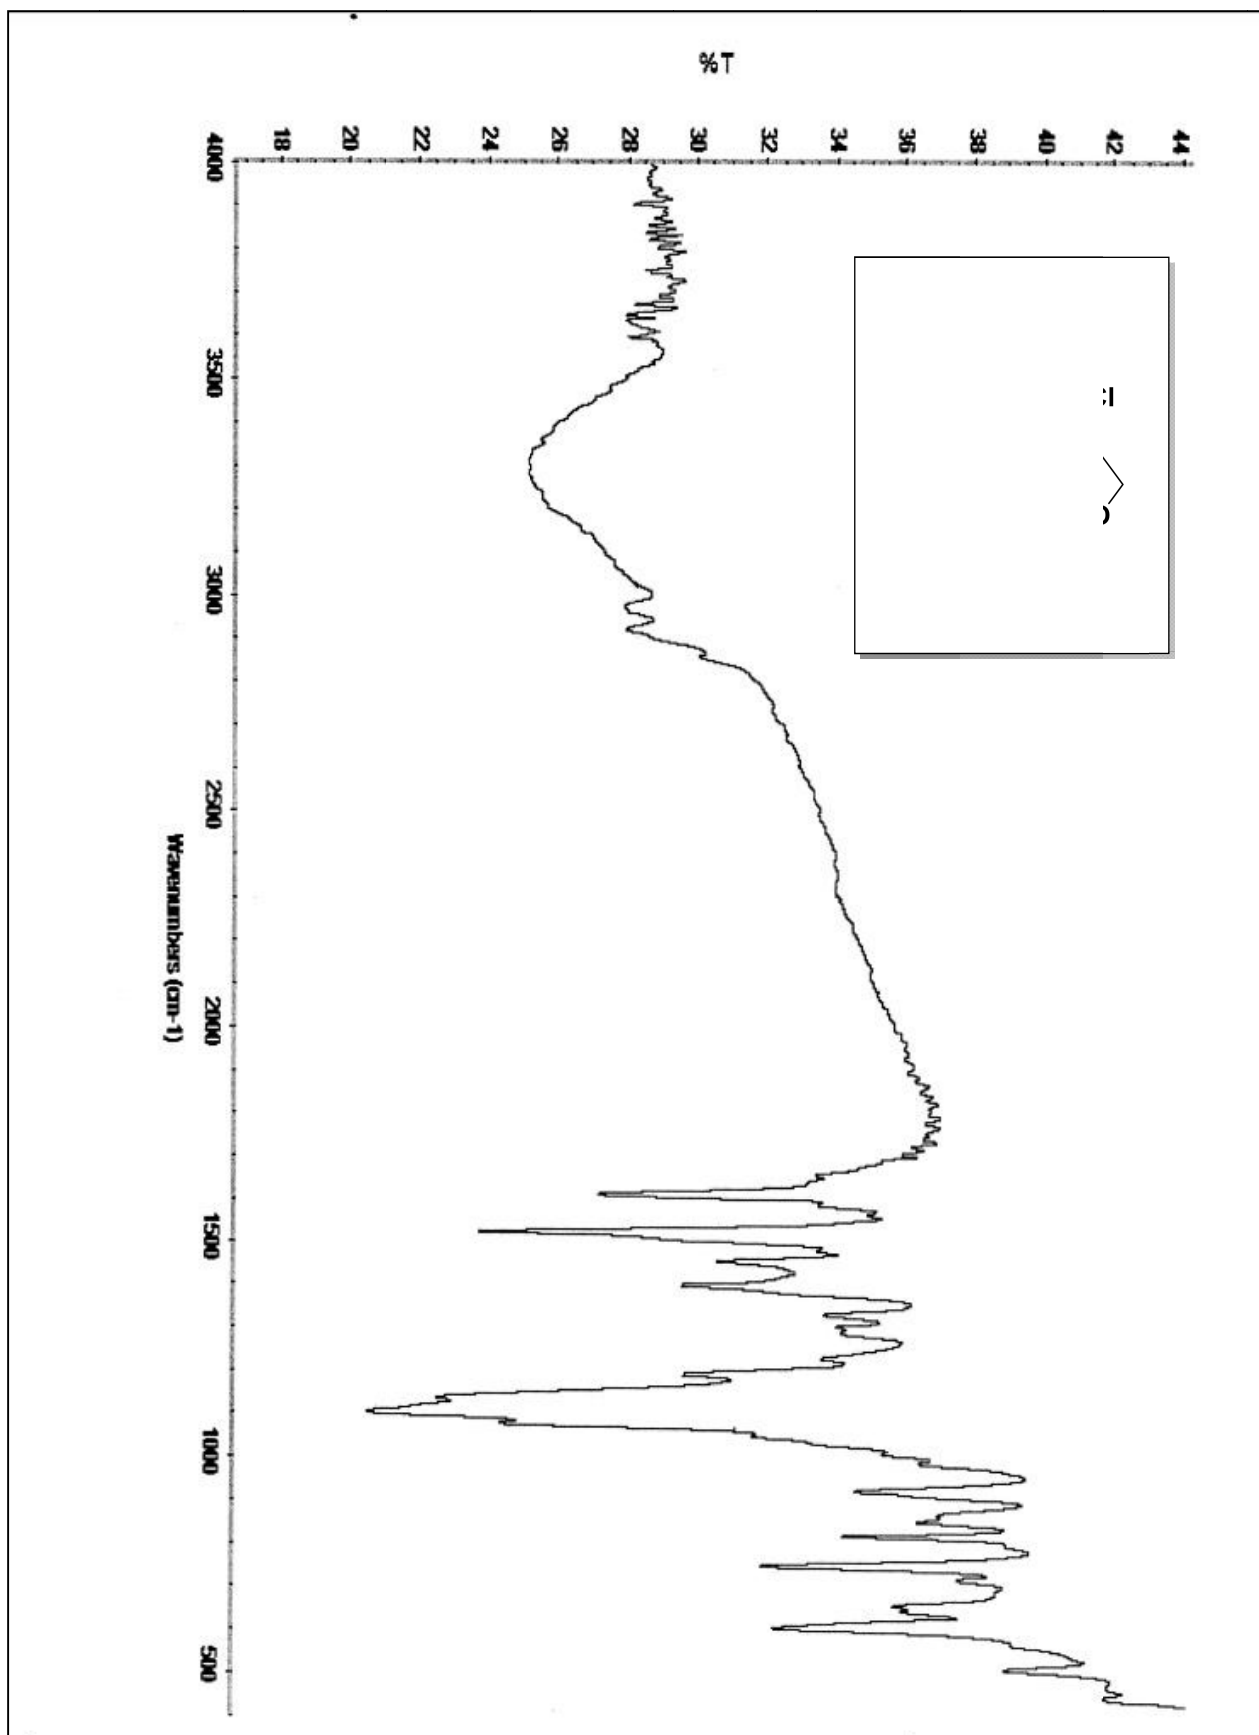

<sup>1</sup>H-NMR/9c/CDCl<sub>3</sub>

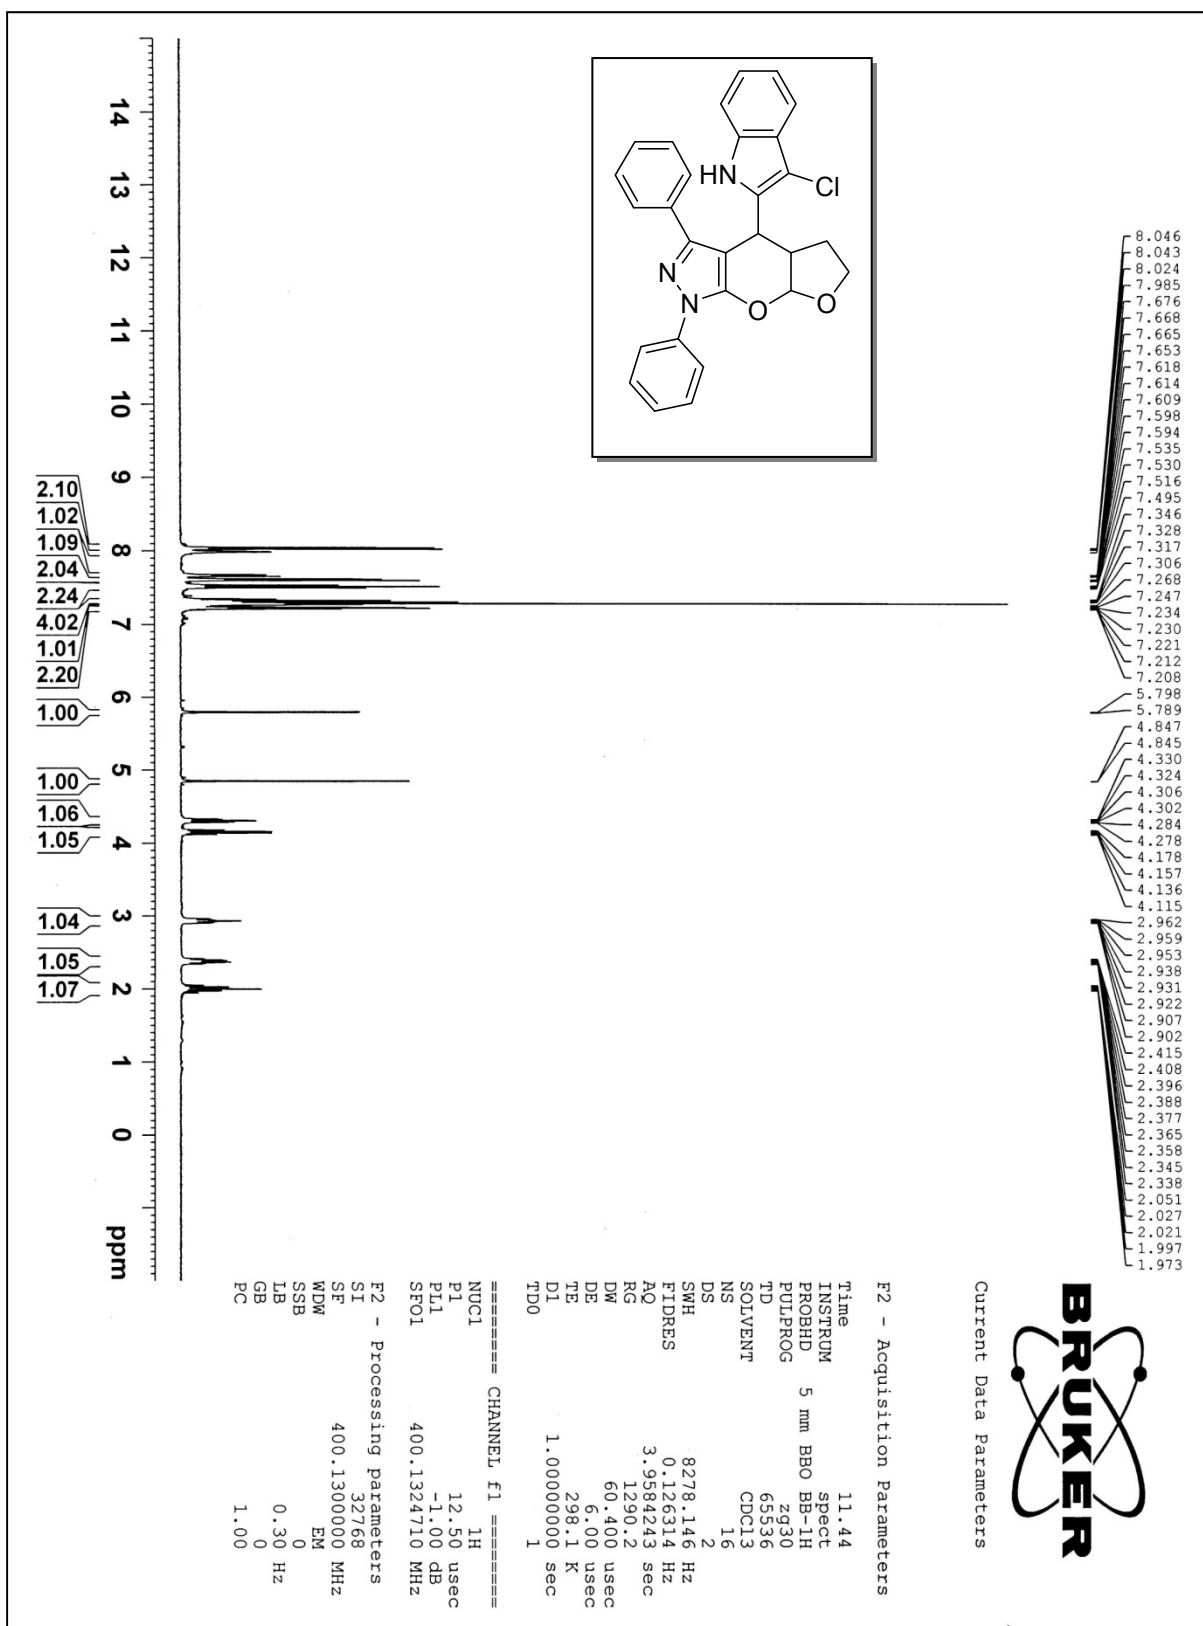

<sup>13</sup>C-NMR (APT)/9c/ CDCl<sub>3</sub>

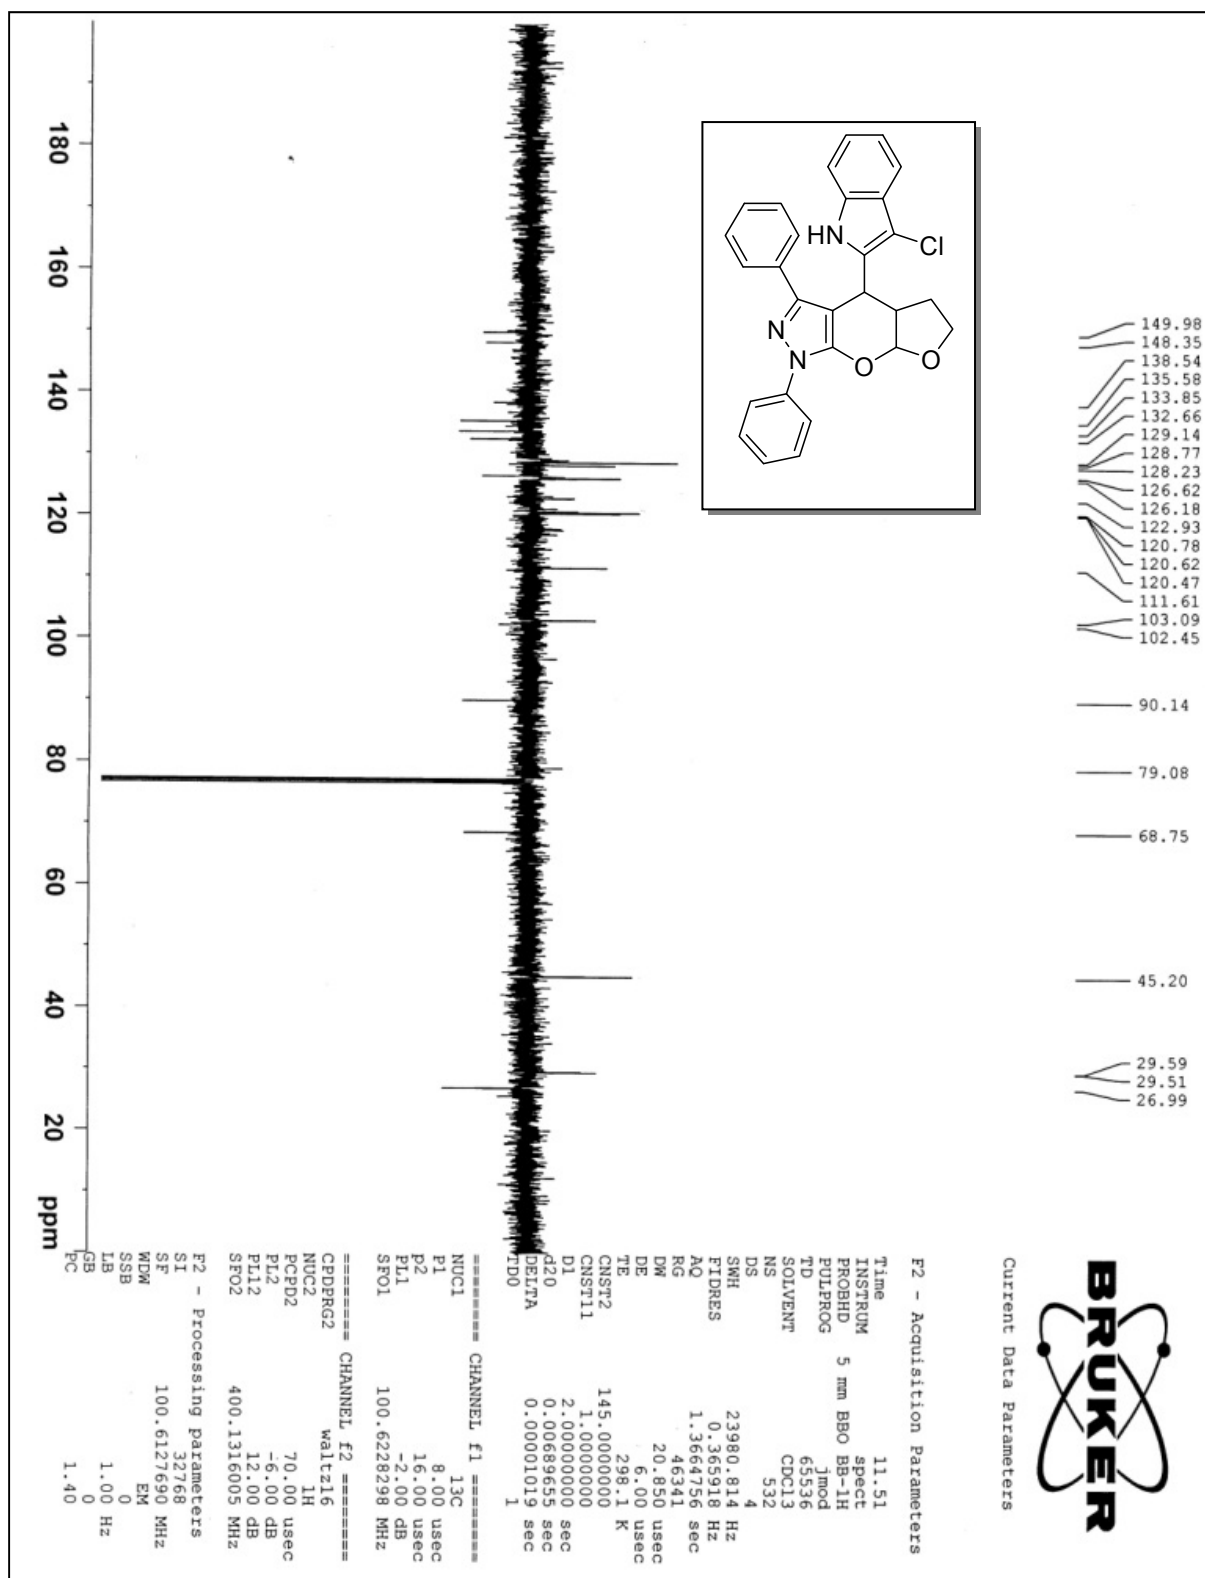



IR/9c/ KBr

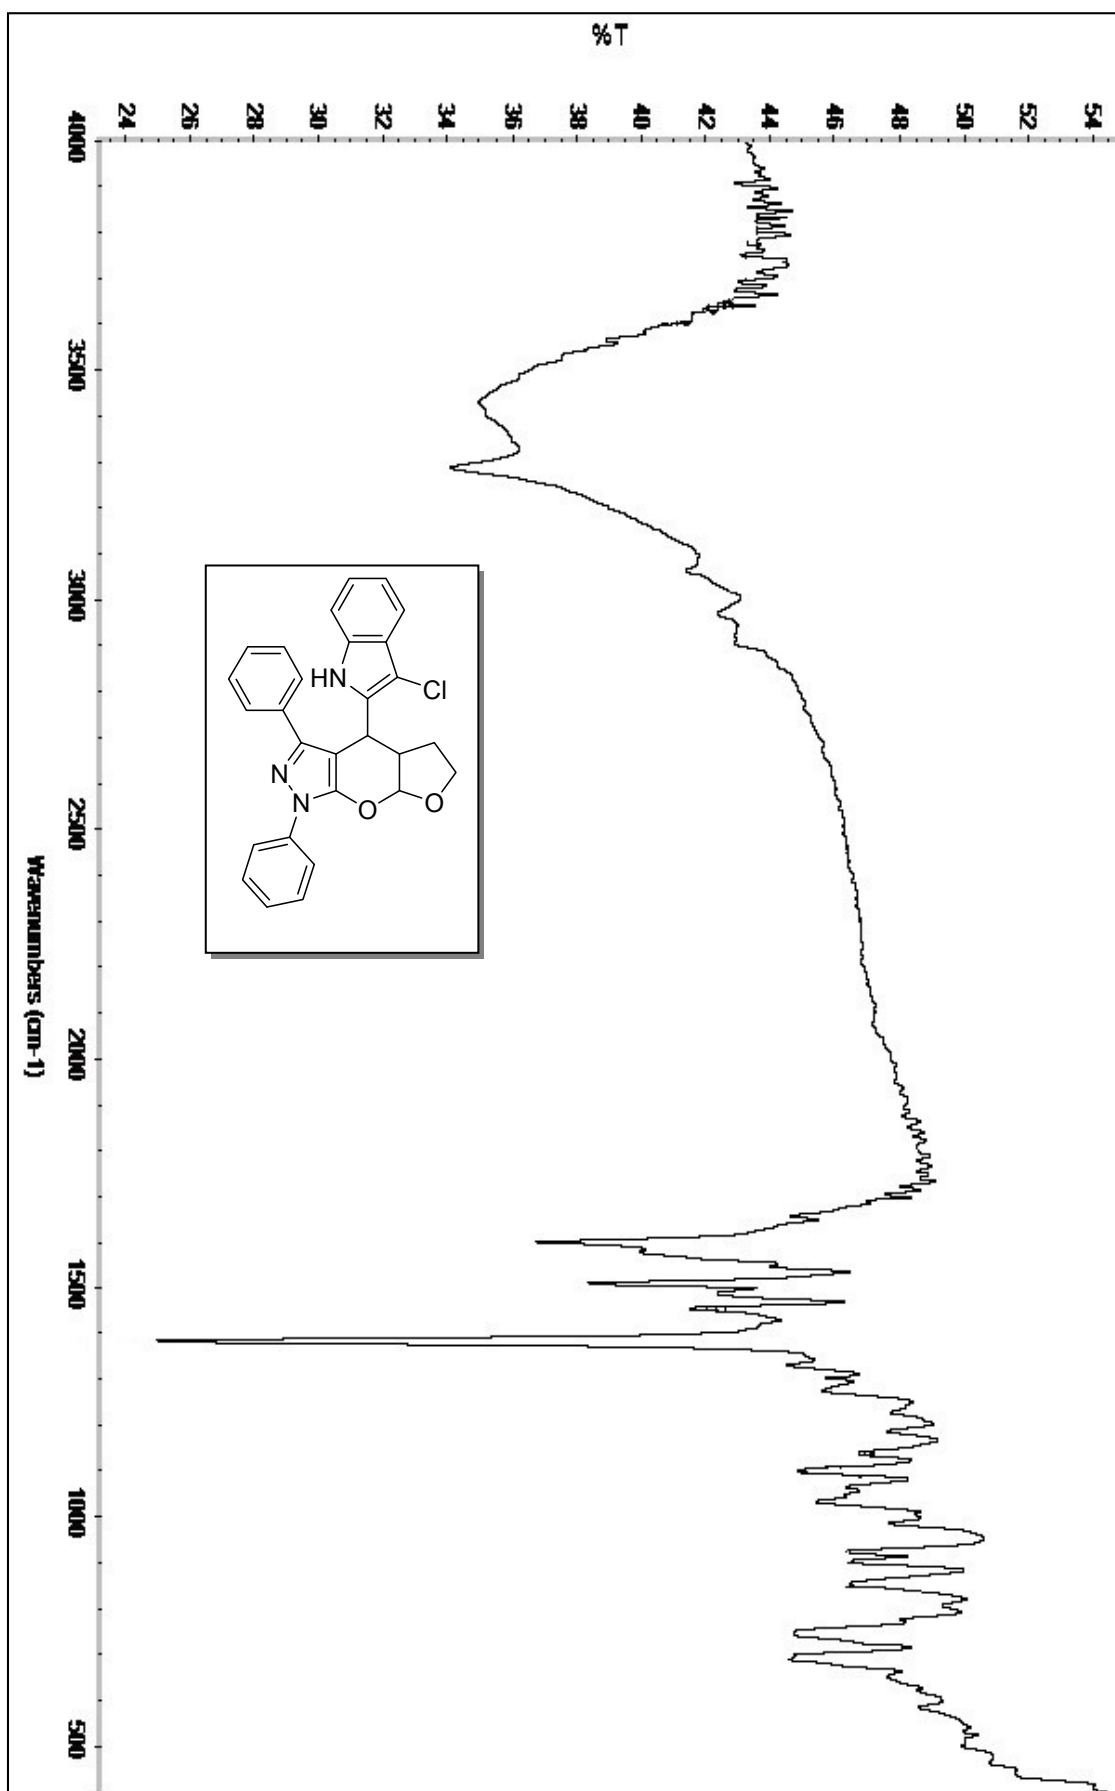

Supplement: c3ra00068k.pdf [file c3ra00068k.pdf]
